# Supplementary material
Source: ML conference proceedings conference paper supplement (https://proceedings.mlr.press/v139/plassier21a.html)
Supplement: Supplementary file 9 [file plassier21a-supp.zip]

---

## Supplementary material

# DG-LMC: A Turn-key and Scalable Synchronous Distributed MCMC Algorithm via Langevin Monte Carlo within Gibbs

---

Vincent Plassier<sup>1 2 \*</sup> Maxime Vono<sup>2 \*</sup> Alain Durmus<sup>3 \*</sup> Eric Moulines<sup>1</sup>

**Notations and conventions.** We denote by  $\mathcal{B}(\mathbb{R}^d)$  the Borel  $\sigma$ -field of  $\mathbb{R}^d$ ,  $\mathbb{M}(\mathbb{R}^d)$  the set of all Borel measurable functions  $f$  on  $\mathbb{R}^d$ ,  $\|f\|_\infty = \sup_{\mathbf{x} \in \mathbb{R}^d} |f(\mathbf{x})|$  and  $\|\cdot\|$  the Euclidean norm on  $\mathbb{R}^d$ . For  $\mu$  a probability measure on  $(\mathbb{R}^d, \mathcal{B}(\mathbb{R}^d))$  and  $f \in \mathbb{M}(\mathbb{R}^d)$  a  $\mu$ -integrable function, denote by  $\mu(f)$  the integral of  $f$  with respect to (w.r.t.)  $\mu$ . Let  $\mu$  and  $\nu$  be two sigma-finite measures on  $(\mathbb{R}^d, \mathcal{B}(\mathbb{R}^d))$ . Denote by  $\mu \ll \nu$  if  $\mu$  is absolutely continuous w.r.t.  $\nu$  and  $d\mu/d\nu$  the associated density. Let  $\mu, \nu$  be two probability measures on  $(\mathbb{R}^d, \mathcal{B}(\mathbb{R}^d))$ . Define the Kullback-Leibler (KL) divergence of  $\mu$  from  $\nu$  by

$$\text{KL}(\mu|\nu) = \begin{cases} \int_{\mathbb{R}^d} \frac{d\mu}{d\nu}(\mathbf{x}) \log \left( \frac{d\mu}{d\nu}(\mathbf{x}) \right) d\nu(\mathbf{x}), & \text{if } \mu \ll \nu \\ +\infty & \text{otherwise.} \end{cases}$$

In addition, define the Pearson  $\chi^2$ -divergence of  $\mu$  from  $\nu$  by

$$\chi^2(\mu|\nu) = \begin{cases} \int_{\mathbb{R}^d} \left( \frac{d\mu}{d\nu}(\mathbf{x}) - 1 \right)^2 d\nu(\mathbf{x}), & \text{if } \mu \ll \nu \\ +\infty & \text{otherwise.} \end{cases}$$

We say that  $\zeta$  is a transference plan of  $\mu$  and  $\nu$  if it is a probability measure on  $(\mathbb{R}^d \times \mathbb{R}^d, \mathcal{B}(\mathbb{R}^d \times \mathbb{R}^d))$  such that for all measurable set  $A$  of  $\mathbb{R}^d$ ,  $\zeta(A \times \mathbb{R}^d) = \mu(A)$  and  $\zeta(\mathbb{R}^d \times A) = \nu(A)$ . We denote by  $\mathcal{T}(\mu, \nu)$  the set of transference plans of  $\mu$  and  $\nu$ . In addition, we say that a couple of  $\mathbb{R}^d$ -random variables  $(X, Y)$  is a coupling of  $\mu$  and  $\nu$  if there exists  $\zeta \in \mathcal{T}(\mu, \nu)$  such that  $(X, Y)$  are distributed according to  $\zeta$ . Let  $\mathbf{M}$  be a  $d \times d$  symmetric positive definite matrix. Denote  $\langle \cdot, \cdot \rangle_{\mathbf{M}}$  the scalar product corresponding to  $\mathbf{M}$ , defined for any  $\mathbf{x}, \mathbf{y} \in \mathbb{R}^d$  by  $\langle \mathbf{x}, \mathbf{y} \rangle_{\mathbf{M}} = \mathbf{x}^\top \mathbf{M} \mathbf{y}$ . Denote  $\|\cdot\|_{\mathbf{M}}$  the corresponding norm. We denote by  $\mathcal{P}_2(\mathbb{R}^d)$  the set of probability measures with finite 2-moment: for all  $\mu \in \mathcal{P}_2(\mathbb{R}^d)$ ,  $\int_{\mathbb{R}^d} \|\mathbf{x}\|^2 d\mu(\mathbf{x}) < \infty$ . We define the Wasserstein distance of order 2 associated with  $\|\cdot\|_{\mathbf{M}}$  for any probability measures  $\mu, \nu \in \mathcal{P}_2(\mathbb{R}^d)$  by

$$W_{\mathbf{M}}^2(\mu, \nu) = \inf_{\zeta \in \mathcal{T}(\mu, \nu)} \int_{\mathbb{R}^d \times \mathbb{R}^d} \|\mathbf{x} - \mathbf{y}\|_{\mathbf{M}}^2 d\zeta(\mathbf{x}, \mathbf{y}).$$

In the case when  $\mathbf{M} = \mathbf{I}_d$ , we will denote the Wasserstein distance of order 2 by  $W_2$ . By Villani (2008, Theorem 4.1), for all  $\mu, \nu$  probability measures on  $\mathbb{R}^d$ , there exists a transference plan  $\zeta^* \in \mathcal{T}(\mu, \nu)$  such that for any coupling  $(X, Y)$  distributed according to  $\zeta^*$ ,  $W_{\mathbf{M}}(\mu, \nu) = \mathbb{E}[\|\mathbf{x} - \mathbf{y}\|_{\mathbf{M}}^2]^{1/2}$ . This kind of transference plan (respectively coupling) will be called an optimal transference plan (respectively optimal coupling) associated with  $W_{\mathbf{M}}$ . By Villani (2008, Theorem 6.16),  $\mathcal{P}_2(\mathbb{R}^d)$  equipped with the Wasserstein distance  $W_{\mathbf{M}}$  is a complete separable metric space. The total variation norm between two probability measures  $\mu$  and  $\nu$  on  $(\mathbb{R}^d, \mathcal{B}(\mathbb{R}^d))$  is defined by

$$\|\mu - \nu\|_{\text{TV}} = \sup_{f \in \mathbb{M}(\mathbb{R}^d), \|f\|_\infty \leq 1} \left| \int_{\mathbb{R}^d} f(\mathbf{x}) d\mu(\mathbf{x}) - \int_{\mathbb{R}^d} f(\mathbf{x}) d\nu(\mathbf{x}) \right|.$$

---

<sup>\*</sup>Equal contribution <sup>1</sup>CMAP, Ecole Polytechnique, Université Paris-Saclay, Palaiseau, France <sup>2</sup>Lagrange Mathematical and Computing Research Center, Huawei, Paris, France <sup>3</sup>Ecole Normale Supérieure Paris-Saclay, Cachan, France. Correspondence to: Vincent Plassier <vincent.plassier@huawei.com>.

For the sake of simplicity, with little abuse, we shall use the same notations for a probability distribution and its associated probability density function. For a Markov chain with transition kernel  $P$  on  $\mathbb{R}^d$  and invariant distribution  $\pi$ , we define the  $\varepsilon$ -mixing time associated to a statistical distance  $D$ , precision  $\varepsilon > 0$  and initial distribution  $\nu$ , by

$$t_{\text{mix}}(\varepsilon; \nu) = \min \left\{ t \geq 0 \mid D(\nu P^t, \pi) \leq \varepsilon \right\},$$

which stands for the minimum number of steps of the Markov chain such that its distribution is at most at an  $\varepsilon$   $D$ -distance from the invariant distribution  $\pi$ . For  $n \geq 1$ , we refer to the set of integers between 1 and  $n$  with the notation  $[n]$ . The  $d$ -multidimensional Gaussian probability distribution with mean  $\boldsymbol{\mu}$  and covariance matrix  $\boldsymbol{\Sigma}$  is denoted by  $N(\boldsymbol{\mu}, \boldsymbol{\Sigma})$ . When  $\boldsymbol{\mu} = \mathbf{0}_d$  and  $\boldsymbol{\Sigma} = \mathbf{I}_d$ , the associated probability density function is denoted by  $\phi_d$ . Let  $F : \mathbb{R}^d \rightarrow \mathbb{R}$  be a twice continuously differentiable function, denote  $\bar{\Delta}$  the vector Laplacian of  $F$  defined, for all  $x \in \mathbb{R}^d$ , by  $\bar{\Delta}F(x) = \{\sum_{k=1}^d (\partial^2 F_k)(x) / \partial x_k^2\}_{k=1}^d$ . For  $0 \leq i < j$ , we use the notation  $\mathbf{u}_{i:j}$  to refer to the vector  $[\mathbf{u}_i^\top, \dots, \mathbf{u}_j^\top]^\top$  built by stacking  $j - i + 1$  vectors  $(\mathbf{u}_k; k \in \{i, \dots, j\})$ . For a given matrix  $\mathbf{M} \in \mathbb{R}^{d \times d}$ , we denote its smallest and largest eigenvalues by  $\lambda_{\min}(\mathbf{M})$  and  $\lambda_{\max}(\mathbf{M})$ , respectively. Fix  $b \in \mathbb{N}^*$  and let  $\mathbf{M}_1, \dots, \mathbf{M}_b$  be  $d$ -dimensional matrices. We denote  $\prod_{\ell=i}^j \mathbf{M}_\ell = \mathbf{M}_j \dots \mathbf{M}_i$  if  $i \leq j$  and with the convention  $\prod_{\ell=i}^j \mathbf{M}_\ell = \mathbf{I}_d$  if  $i > j$ . For any  $b \in \mathbb{N}^*$ ,  $(d_i)_{i \in [b]} \in (\mathbb{N}^*)^b$  and  $(\mathbf{M}_i)_{i \in [b]} \in \otimes_{i \in [b]} \mathbb{R}^{d_i \times d_i}$ , we denote  $\text{diag}(\mathbf{M}_1, \dots, \mathbf{M}_b)$  the unique matrix  $\mathbf{M} \in \mathbb{R}^{(\sum_i d_i) \times (\sum_i d_i)}$  satisfying for any  $\mathbf{u} = (\mathbf{u}_1, \dots, \mathbf{u}_b) \in \mathbb{R}^{d_1} \times \dots \times \mathbb{R}^{d_b}$ ,  $\mathbf{M}\mathbf{u} = \sum_{i=1}^b \mathbf{M}_i \mathbf{u}_i$  which corresponds to

$$\mathbf{M} = \begin{pmatrix} \mathbf{M}_1 & \mathbf{0}_{d_1, d_2} & \cdots & \mathbf{0}_{d_1, d_b} \\ \mathbf{0}_{d_2, d_1} & \ddots & \ddots & \vdots \\ \vdots & \ddots & \ddots & \mathbf{0}_{d_{b-1}, d_b} \\ \mathbf{0}_{d_b, d_1} & \cdots & \mathbf{0}_{d_b, d_{b-1}} & \mathbf{M}_b \end{pmatrix}.$$

For any  $\mathbf{v} \in \mathbb{R}^b$ , define the block diagonal matrix

$$\mathbf{D}_{\mathbf{v}} = \text{diag}(v_1 \cdot \mathbf{I}_{d_1}, \dots, v_b \cdot \mathbf{I}_{d_b}) \in \mathbb{R}^{p \times p}. \quad (\text{S1})$$

For any symmetric matrices  $\mathbf{S}_1, \mathbf{S}_2 \in \mathbb{R}^{p \times p}$ , we note  $\mathbf{S}_1 \preceq \mathbf{S}_2$  if and only if, for any  $\mathbf{u} \in \mathbb{R}^p$ , we have  $\mathbf{u}^\top (\mathbf{S}_2 - \mathbf{S}_1) \mathbf{u} \geq 0$ . Let  $(X, \mathcal{X})$  and  $(Y, \mathcal{Y})$  be two measurable spaces, we say that a transition probability kernel on  $(Y \times X) \times \mathcal{Y}$  is a conditional Markov kernel. One elementary step in most Gibbs samplers corresponds to a conditional Markov kernel.

## S1. Proof of Proposition 1

Let  $b' \in [b-1]$ ,  $p' = \sum_{i=b'+1}^b d_i$  and consider

$$\mathbf{B}_{b'}^\top = [\mathbf{A}_{b'+1}^\top / \rho_{b'+1}^{1/2} \cdots \mathbf{A}_b^\top / \rho_b^{1/2}] \in \mathbb{R}^{d \times p'}, \quad \bar{\mathbf{B}}_{b'} = \mathbf{B}_{b'}^\top \mathbf{B}_{b'} = \sum_{i=b'+1}^b \{\mathbf{A}_i^\top \mathbf{A}_i / \rho_i\} \in \mathbb{R}^{d \times d}. \quad (\text{S2})$$

Note that under **H1**,  $\bar{\mathbf{B}}_{b'}$  is invertible. Indeed, it is a symmetric positive definite matrix since for any  $\boldsymbol{\theta} \in \mathbb{R}^d$ ,  $\langle \bar{\mathbf{B}}_{b'} \boldsymbol{\theta}, \boldsymbol{\theta} \rangle \geq [\min_{i \in [b]} \rho_i^{-1}] \langle \sum_{i=b'+1}^b \mathbf{A}_i^\top \mathbf{A}_i \boldsymbol{\theta}, \boldsymbol{\theta} \rangle > 0$  using that  $\sum_{i=b'+1}^b \mathbf{A}_i^\top \mathbf{A}_i$  is invertible. Define the orthogonal projection onto the range of  $\mathbf{B}_{b'}$  and the diagonal matrix:

$$\mathbf{P}_{b'} = \mathbf{B}_{b'} \bar{\mathbf{B}}_{b'}^{-1} \mathbf{B}_{b'}^\top, \quad \tilde{\mathbf{D}}_{b'} = \text{diag}(\mathbf{I}_{d_{b'+1}} / \rho_{b'+1}, \dots, \mathbf{I}_{d_b} / \rho_b). \quad (\text{S3})$$

### S1.1. Technical lemma

**Lemma S1.** Assume **H1**. For any  $(\boldsymbol{\theta}, \mathbf{z}_{b'+1:b}) \in \mathbb{R}^d \times \mathbb{R}^{p'}$ , setting  $\mathbf{z} = \mathbf{z}_{b'+1:b}$ , we have

$$\begin{aligned} \sum_{i=b'+1}^b \left\{ \|\mathbf{z}_i - \mathbf{A}_i \boldsymbol{\theta}\|^2 / \rho_i \right\} &= (\tilde{\mathbf{D}}_{b'}^{1/2} \mathbf{z})^\top \{\mathbf{I}_{p'} - \mathbf{P}_{b'}\} (\tilde{\mathbf{D}}_{b'}^{1/2} \mathbf{z}) \\ &\quad + (\boldsymbol{\theta} - \bar{\mathbf{B}}_{b'}^{-1} \mathbf{B}_{b'}^\top \tilde{\mathbf{D}}_{b'}^{1/2} \mathbf{z})^\top \bar{\mathbf{B}}_{b'} (\boldsymbol{\theta} - \bar{\mathbf{B}}_{b'}^{-1} \mathbf{B}_{b'}^\top \tilde{\mathbf{D}}_{b'}^{1/2} \mathbf{z}). \end{aligned}$$

*Proof.* Setting  $\mathbf{b} = \mathbf{B}_{b'}^\top \tilde{\mathbf{D}}_{b'}^{1/2} \mathbf{z}$  and using the fact that  $\bar{\mathbf{B}}_{b'}$  is symmetric, we have

$$\begin{aligned} \sum_{i=b'+1}^b \left\{ \|\mathbf{z}_i - \mathbf{A}_i \boldsymbol{\theta}\|^2 / \rho_i \right\} &= \boldsymbol{\theta}^\top \bar{\mathbf{B}}_{b'} \boldsymbol{\theta} - 2\boldsymbol{\theta}^\top \mathbf{b} + \sum_{i=b'+1}^b \|\mathbf{z}_i\|^2 / \rho_i \\ &= \sum_{i=b'+1}^b \|\mathbf{z}_i\|^2 / \rho_i - \mathbf{b}^\top \bar{\mathbf{B}}_{b'}^{-1} \mathbf{b} + (\boldsymbol{\theta} - \bar{\mathbf{B}}_{b'}^{-1} \mathbf{b})^\top \bar{\mathbf{B}}_{b'} (\boldsymbol{\theta} - \bar{\mathbf{B}}_{b'}^{-1} \mathbf{b}). \end{aligned}$$

Using that  $\mathbf{b}^\top \bar{\mathbf{B}}_{b'}^{-1} \mathbf{b} = (\tilde{\mathbf{D}}_{b'}^{1/2} \mathbf{z})^\top \mathbf{P}_{b'} (\tilde{\mathbf{D}}_{b'}^{1/2} \mathbf{z})$  and  $\mathbf{P}_{b'}$  is a projection,  $\mathbf{P}_{b'}^2 = \mathbf{P}_{b'}$  completes the proof.  $\square$

## S1.2. Proof of Proposition 1

**Proposition S2.** Assume **H1**. Then, the function  $\psi : (\boldsymbol{\theta}, \mathbf{z}_{1:b}) \mapsto \prod_{i=1}^b \exp\{-U_i(\mathbf{z}_i) - \|\mathbf{z}_i - \mathbf{A}_i \boldsymbol{\theta}\|^2 / (2\rho_i)\}$  is integrable on  $\mathbb{R}^d \times \mathbb{R}^p$ , where  $p = \sum_{i=1}^b d_i$ .

*Proof.* Using **H1** and the Fubini theorem, there exists  $C_1 > 0$  such that:

$$\begin{aligned} & \int_{\mathbb{R}^d} \left[ \prod_{i=1}^{b'} \int_{\mathbb{R}^{d_i}} e^{-U_i(\mathbf{z}_i)} e^{-\frac{\|\mathbf{z}_i - \mathbf{A}_i \boldsymbol{\theta}\|^2}{2\rho_i}} d\mathbf{z}_i \cdot \prod_{j=b'+1}^b \int_{\mathbb{R}^{d_j}} e^{-U_j(\mathbf{z}_j)} e^{-\frac{\|\mathbf{z}_j - \mathbf{A}_j \boldsymbol{\theta}\|^2}{2\rho_j}} d\mathbf{z}_j \right] d\boldsymbol{\theta} \\ & \leq C_1 \int_{\mathbb{R}^d} \left[ \prod_{i=1}^{b'} \int_{\mathbb{R}^{d_i}} e^{-\frac{\|\mathbf{z}_i - \mathbf{A}_i \boldsymbol{\theta}\|^2}{2\rho_i}} d\mathbf{z}_i \cdot \prod_{j=b'+1}^b \int_{\mathbb{R}^{d_j}} e^{-U_j(\mathbf{z}_j)} e^{-\frac{\|\mathbf{z}_j - \mathbf{A}_j \boldsymbol{\theta}\|^2}{2\rho_j}} d\mathbf{z}_j \right] d\boldsymbol{\theta} \\ & \leq C_1 \prod_{i=1}^{b'} (2\pi\rho_i)^{d_i/2} \int_{\mathbb{R}^d} \left[ \prod_{j=b'+1}^b \int_{\mathbb{R}^{d_j}} e^{-U_j(\mathbf{z}_j)} \exp\left(-\|\mathbf{z}_j - \mathbf{A}_j \boldsymbol{\theta}\|^2 / (2\rho_j)\right) d\mathbf{z}_j \right] d\boldsymbol{\theta} \\ & = C_1 \prod_{i=1}^{b'} (2\pi\rho_i)^{d_i/2} \int_{\mathbb{R}^{d_{b'+1}}} \cdots \int_{\mathbb{R}^{d_b}} \left[ \prod_{j=b'+1}^b e^{-U_j(\mathbf{z}_j)} \right] \left[ \int_{\mathbb{R}^d} \prod_{j=b'+1}^b e^{-\frac{\|\mathbf{z}_j - \mathbf{A}_j \boldsymbol{\theta}\|^2}{2\rho_j}} d\boldsymbol{\theta} \right] d\mathbf{z}_{b'+1:b}. \quad (\text{S4}) \end{aligned}$$

Using Lemma S1 and the fact that  $\mathbf{I}_{p'} - \mathbf{P}_{b'}$  is positive definite, we obtain

$$\begin{aligned} & \int_{\mathbb{R}^d} \prod_{j=b'+1}^b \exp\left(-\|\mathbf{z}_j - \mathbf{A}_j \boldsymbol{\theta}\|^2 / (2\rho_j)\right) d\boldsymbol{\theta} \\ & = \exp\left(-(\tilde{\mathbf{D}}_{b'}^{1/2} \mathbf{z})^\top \{\mathbf{I}_{p'} - \mathbf{P}_{b'}\} (\tilde{\mathbf{D}}_{b'}^{1/2} \mathbf{z}) / 2\right) \\ & \times \int_{\mathbb{R}^d} \exp\left(-(\boldsymbol{\theta} - \bar{\mathbf{B}}_{b'}^{-1} \mathbf{B}_{b'}^\top \tilde{\mathbf{D}}_{b'}^{1/2} \mathbf{z})^\top \bar{\mathbf{B}}_{b'} (\boldsymbol{\theta} - \bar{\mathbf{B}}_{b'}^{-1} \mathbf{B}_{b'}^\top \tilde{\mathbf{D}}_{b'}^{1/2} \mathbf{z}) / 2\right) d\boldsymbol{\theta} \\ & \leq \det(\bar{\mathbf{B}}_{b'})^{-1/2} (2\pi)^{d/2}. \end{aligned}$$

Then, the proof is completed by plugging this expression into (S4) and using from **H1** that  $\mathbf{z}_{b'+1:b} \mapsto \prod_{j=b'+1}^b e^{-U_j(\mathbf{z}_j)}$  is integrable.  $\square$

## S2. Proof of Proposition 2

This section aims at proving Proposition 2 in the main paper. To ease the understanding, we dissociate the scenarios where  $\max_{i \in [b]} N_i = 1$  and  $\max_{i \in [b]} N_i > 1$ . In addition, in all this section  $\boldsymbol{\rho} \in (\mathbb{R}_+^*)^b$  is assumed to be fixed.

### S2.1. Single local LMC iteration

In this section, we assume that a single LMC step is performed locally on each worker, that is  $\max_{i \in [b]} N_i = 1$ . For this, we introduce the conditional Markov transition kernel defined for any  $\boldsymbol{\gamma} = (\gamma_1, \dots, \gamma_b)$ ,  $\boldsymbol{\theta} \in \mathbb{R}^d$ ,  $\mathbf{z} = (\mathbf{z}_1, \dots, \mathbf{z}_b) \in$

$\mathbb{R}^{d_1} \times \cdots \times \mathbb{R}^{d_b}$ , and for  $i \in [b]$ ,  $\mathbf{B}_i \in \mathcal{B}(\mathbb{R}^{d_i})$ , by

$$Q_{\rho, \gamma}(\mathbf{z}, \mathbf{B}_1 \times \cdots \times \mathbf{B}_b | \boldsymbol{\theta}) = \prod_{i=1}^b R_{\rho_i, \gamma_i}(\mathbf{z}_i, \mathbf{B}_i | \boldsymbol{\theta}), \quad (\text{S5})$$

where

$$R_{\rho_i, \gamma_i}(\mathbf{z}_i, \mathbf{B}_i | \boldsymbol{\theta}) = \int_{\mathbf{B}_i} \exp \left\{ -\frac{1}{4\gamma_i} \left\| \tilde{\mathbf{z}}_i - \left(1 - \frac{\gamma_i}{\rho_i}\right) \mathbf{z}_i - \frac{\gamma_i}{\rho_i} \mathbf{A}_i \boldsymbol{\theta} + \gamma_i \nabla U_i(\mathbf{z}_i) \right\|^2 \right\} \frac{d\tilde{\mathbf{z}}_i}{(4\pi\gamma_i)^{d_i/2}}. \quad (\text{S6})$$

Recall that  $p = \sum_{i=1}^b d_i$ . The considered Gibbs sampler in Algorithm 1 defines a homogeneous Markov chain  $X_n^\top = (\theta_n^\top, Z_n^\top)_{n \geq 1}$  where  $Z_n^\top = ([Z_n^1]^\top, \dots, [Z_n^b]^\top)^\top$ . Indeed, it is easy to show that for any  $n \in \mathbb{N}$  and measurable bounded function  $f: \mathbb{R}^p \rightarrow \mathbb{R}_+$ ,  $\mathbb{E}[f(Z_{n+1}) | X_n] = \int_{\mathbb{R}^p} f(\mathbf{z}) Q_{\rho, \gamma}(Z_n, d\mathbf{z} | \theta_n)$  and therefore  $(X_n)_{n \in \mathbb{N}}$  is associated with the Markov kernel defined, for any  $\mathbf{x}^\top = (\boldsymbol{\theta}^\top, \mathbf{z}^\top) \in \mathbb{R}^d \times \mathbb{R}^p$  and  $\mathbf{A} \in \mathcal{B}(\mathbb{R}^d)$ ,  $\mathbf{B} \in \mathcal{B}(\mathbb{R}^p)$ , by

$$P_{\rho, \gamma}(\mathbf{x}, \mathbf{A} \times \mathbf{B}) = \int_{\mathbf{B}} Q_{\rho, \gamma}(\mathbf{z}, d\tilde{\mathbf{z}} | \boldsymbol{\theta}) \int_{\mathbf{A}} \Pi_{\rho}(d\tilde{\boldsymbol{\theta}} | \tilde{\mathbf{z}}), \quad (\text{S7})$$

where  $\Pi_{\rho}(\cdot | \tilde{\mathbf{z}})$  is defined in (5). Let  $(\xi_n)_{n \geq 1}$  be a sequence of i.i.d.  $d$ -dimensional standard Gaussian random variables independent of the family of independent random variables  $\{(\eta_n^i)_{n \geq 1} : i \in [b]\}$  where for any  $i \in [b]$  and  $n \geq 1$ ,  $\eta_n^i$  is a  $d_i$ -dimensional standard Gaussian random variable. We define the stochastic processes  $(X_n, \tilde{X}_n)_{n \geq 0}$  on  $\mathbb{R}^p \times \mathbb{R}^p$  starting from  $(X_0, \tilde{X}_0) = (\mathbf{x}, \tilde{\mathbf{x}}) = ((\boldsymbol{\theta}^\top, \mathbf{z}^\top)^\top, (\tilde{\boldsymbol{\theta}}^\top, \tilde{\mathbf{z}}^\top)^\top)$  and following the recursion for  $n \geq 0$ ,

$$X_{n+1} = (\theta_{n+1}^\top, Z_{n+1}^\top)^\top, \quad \tilde{X}_{n+1} = (\tilde{\theta}_{n+1}^\top, \tilde{Z}_{n+1}^\top)^\top, \quad (\text{S8})$$

where  $Z_{n+1} = ([Z_{n+1}^1]^\top, \dots, [Z_{n+1}^b]^\top)^\top$ ,  $\tilde{Z}_{n+1} = ([\tilde{Z}_{n+1}^1]^\top, \dots, [\tilde{Z}_{n+1}^b]^\top)^\top$  are defined, for any  $i \in [b]$ , by

$$\begin{aligned} Z_{n+1}^i &= (1 - \gamma_i/\rho_i) Z_n^i + (\gamma_i/\rho_i) \mathbf{A}_i \theta_n - \gamma_i \nabla U_i(Z_n^i) + \sqrt{2\gamma_i} \eta_{n+1}^i, \\ \tilde{Z}_{n+1}^i &= (1 - \gamma_i/\rho_i) \tilde{Z}_n^i + (\gamma_i/\rho_i) \mathbf{A}_i \tilde{\theta}_n - \gamma_i \nabla U_i(\tilde{Z}_n^i) + \sqrt{2\gamma_i} \eta_{n+1}^i, \end{aligned} \quad (\text{S9})$$

and  $\theta_{n+1}, \tilde{\theta}_{n+1}$  by

$$\theta_{n+1} = \bar{\mathbf{B}}_0^{-1} \mathbf{B}_0^\top \tilde{\mathbf{D}}_0^{1/2} Z_{n+1} + \bar{\mathbf{B}}_0^{-1/2} \xi_{n+1}, \quad \tilde{\theta}_{n+1} = \bar{\mathbf{B}}_0^{-1} \mathbf{B}_0^\top \tilde{\mathbf{D}}_0^{1/2} \tilde{Z}_{n+1} + \bar{\mathbf{B}}_0^{-1/2} \xi_{n+1}, \quad (\text{S10})$$

where  $\bar{\mathbf{B}}_0, \mathbf{B}_0$  and  $\tilde{\mathbf{D}}_0$  are given in (S2) and (S3), respectively. Note that  $X_n$  and  $\tilde{X}_n$  are distributed according to  $\delta_{\mathbf{x}} P_{\rho, \gamma}^n$  and  $\delta_{\tilde{\mathbf{x}}} P_{\rho, \gamma}^n$ , respectively. Hence, by definition of the Wasserstein distance of order 2, it follows that

$$W_2(\delta_{\mathbf{x}} P_{\rho, \gamma}^n, \delta_{\tilde{\mathbf{x}}} P_{\rho, \gamma}^n) \leq \mathbb{E} \left[ \|X_n - \tilde{X}_n\|^2 \right]^{1/2}. \quad (\text{S11})$$

Thus, in this section we focus on upper bounding the squared norm  $\|X_n - \tilde{X}_n\|$  from which we get an explicit bound on the Wasserstein distance thanks to the previous inequality.

### S2.1.1. SUPPORTING LEMMATA

Note that **H1** implies the invertibility of the matrix  $\mathbf{B}_0$  defined in (S2) since we have the existence of  $b' \in [b-1]$ , such that  $\sum_{i=b'+1}^b \lambda_{\min}(\mathbf{A}_i^\top \mathbf{A}_i)/\rho_i > 0$  and by the semi-positiveness of the symmetric matrices  $\{\mathbf{A}_i^\top \mathbf{A}_i\}_{i \in [b]}$ , we get that  $\lambda_{\min}(\mathbf{B}_0) = \sum_{i=1}^b \lambda_{\min}(\mathbf{A}_i^\top \mathbf{A}_i)/\rho_i \geq \sum_{i=b'+1}^b \lambda_{\min}(\mathbf{A}_i^\top \mathbf{A}_i)/\rho_i$ . To prove Proposition 2 in the case  $\max_{i \in [b]} N_i = 1$ , we first upper bound (S83) by building upon the following two technical lemmas.

**Lemma S3.** Assume **H1** and consider  $(X_n, \tilde{X}_n)_{n \in \mathbb{N}}$  defined in (S8). Then, for any  $n \in \mathbb{N}$ , it holds almost surely that

$$\|X_{n+1} - \tilde{X}_{n+1}\|^2 \leq (1 + \|\bar{\mathbf{B}}_0^{-1} \mathbf{B}_0^\top \tilde{\mathbf{D}}_0^{1/2}\|^2) \|Z_{n+1} - \tilde{Z}_{n+1}\|^2.$$

*Proof.* Let  $n \geq 0$ . By (S10), we have  $\theta_{n+1} - \tilde{\theta}_{n+1} = \bar{\mathbf{B}}_0^{-1} \mathbf{B}_0^\top \tilde{\mathbf{D}}_0^{1/2} (Z_{n+1} - \tilde{Z}_{n+1})$  which implies that

$$\|X_{n+1} - \tilde{X}_{n+1}\|^2 = \|\theta_{n+1} - \tilde{\theta}_{n+1}\|^2 + \|Z_{n+1} - \tilde{Z}_{n+1}\|^2 \leq (1 + \|\bar{\mathbf{B}}_0^{-1} \mathbf{B}_0^\top \tilde{\mathbf{D}}_0^{1/2}\|^2) \|Z_{n+1} - \tilde{Z}_{n+1}\|^2.$$

□

Define the contraction factor

$$\kappa_\gamma = \max_{i \in [b]} \{ |1 - \gamma_i m_i| \vee |1 - \gamma_i (M_i + 1/\rho_i)| \} . \quad (\text{S12})$$

Then, the following result holds.

**Lemma S4.** Assume **H1-H2** and let  $\gamma \in (\mathbb{R}_+^*)^b$ . Then for any  $\mathbf{x} = (\mathbf{z}^\top, \boldsymbol{\theta}^\top)^\top$ ,  $\tilde{\mathbf{x}} = (\tilde{\mathbf{z}}^\top, \tilde{\boldsymbol{\theta}}^\top)^\top$ , with  $(\boldsymbol{\theta}, \tilde{\boldsymbol{\theta}}) \in (\mathbb{R}^d)^2$  and  $(\mathbf{z}, \tilde{\mathbf{z}}) \in (\mathbb{R}^p)^2$ , for any  $n \geq 1$ , we have

$$W_2(\delta_{\mathbf{x}} P_{\rho, \gamma}^n, \delta_{\tilde{\mathbf{x}}} P_{\rho, \gamma}^n) \leq \kappa_\gamma^{n-1} \cdot \left( (1 + \|\bar{\mathbf{B}}_0^{-1} \mathbf{B}_0^\top \tilde{\mathbf{D}}_0^{1/2}\|^2) \cdot \frac{\max_{i \in [b]} \{\gamma_i\}}{\min_{i \in [b]} \{\gamma_i\}} \right)^{1/2} \times \left[ \kappa_\gamma \|\mathbf{z} - \tilde{\mathbf{z}}\| + \|\mathbf{D}_{\gamma/\sqrt{\rho}} \mathbf{B}_0\| \|\boldsymbol{\theta} - \tilde{\boldsymbol{\theta}}\| \right] ,$$

where  $\mathbf{D}_{\gamma/\sqrt{\rho}}$  is defined as in (S1) with  $\gamma/\sqrt{\rho} = (\gamma_1/\rho_1^{1/2}, \dots, \gamma_b/\rho_b^{1/2})$ ,  $\bar{\mathbf{B}}_0$ ,  $\mathbf{B}_0$ ,  $P_{\rho, \gamma}$  and  $\kappa_\gamma$  are given in (S2), (S7), (S12), respectively.

*Proof.* Consider  $(X_k, \tilde{X}_k)_{k \in \mathbb{N}}$  defined in (S8). By (S83) and Lemma S3, we need to bound  $(\|Z_k - \tilde{Z}_k\|)_{k \in \mathbb{N}}$ . Let  $n \in \mathbb{N}^*$ . For any  $i \in [b]$ , we have by (S9), that

$$Z_{n+1}^i - \tilde{Z}_{n+1}^i = \left(1 - \frac{\gamma_i}{\rho_i}\right) (Z_n^i - \tilde{Z}_n^i) + \frac{\gamma_i}{\rho_i} \mathbf{A}_i (\theta_n - \tilde{\theta}_n) - \gamma_i \left( \nabla U_i(Z_n^i) - \nabla U_i(\tilde{Z}_n^i) \right) . \quad (\text{S13})$$

Since  $U_i$  is twice differentiable, we have

$$\nabla U_i(Z_n^i) - \nabla U_i(\tilde{Z}_n^i) = \int_0^1 \nabla^2 U_i(\tilde{Z}_n^i + t(Z_n^i - \tilde{Z}_n^i)) dt \cdot (Z_n^i - \tilde{Z}_n^i) .$$

Using  $\theta_n - \tilde{\theta}_n = \bar{\mathbf{B}}_0^{-1} \mathbf{B}_0^\top \tilde{\mathbf{D}}_0^{1/2} (Z_n - \tilde{Z}_n)$ , it follows that

$$Z_{n+1}^i - \tilde{Z}_{n+1}^i = \left( \left[1 - \frac{\gamma_i}{\rho_i}\right] \mathbf{I}_{d_i} - \gamma_i \int_0^1 \nabla^2 U_i(\tilde{Z}_n^i + t(Z_n^i - \tilde{Z}_n^i)) dt \right) (Z_n^i - \tilde{Z}_n^i) + \frac{\gamma_i}{\rho_i} \mathbf{A}_i \bar{\mathbf{B}}_0^{-1} \mathbf{B}_0^\top \tilde{\mathbf{D}}_0^{1/2} (Z_n - \tilde{Z}_n) .$$

Consider the  $p \times p$  block diagonal matrix defined by

$$\mathbf{D}_{U, n} = \text{diag} \left( \gamma_1 \int_0^1 \nabla^2 U_1(\tilde{Z}_n^1 + t(Z_n^1 - \tilde{Z}_n^1)) dt, \dots, \gamma_b \int_0^1 \nabla^2 U_b(\tilde{Z}_n^b + t(Z_n^b - \tilde{Z}_n^b)) dt \right) .$$

With the projection matrix  $\mathbf{P}_0$  defined in (S3), the difference  $Z_{n+1} - \tilde{Z}_{n+1}$  can be rewritten as

$$Z_{n+1} - \tilde{Z}_{n+1} = \left( \mathbf{I}_p - \mathbf{D}_{U, n} - \mathbf{D}_\gamma^{1/2} \mathbf{D}_{\gamma/\rho}^{1/2} (\mathbf{I}_p - \mathbf{P}_0) \tilde{\mathbf{D}}_0^{1/2} \right) (Z_n - \tilde{Z}_n) ,$$

where  $\mathbf{D}_{\gamma/\rho}$  is defined as in (S1) with  $\gamma/\rho = (\gamma_1/\rho_1, \dots, \gamma_b/\rho_b)$ . Since  $\mathbf{D}_{U, n}$  commutes with  $\mathbf{D}_\gamma$  and  $\mathbf{P}_0$  is an orthogonal projection matrix, using **H2-(i)-(ii)**, we get

$$\begin{aligned} & \|Z_{n+1} - \tilde{Z}_{n+1}\|_{\mathbf{D}_\gamma^{-1}} \\ &= \|\mathbf{D}_\gamma^{-1/2} (\mathbf{D}_\gamma^{1/2} \mathbf{D}_\gamma^{-1/2} - \mathbf{D}_\gamma^{1/2} \mathbf{D}_{U, n} \mathbf{D}_\gamma^{-1/2} - \mathbf{D}_\gamma^{1/2} \mathbf{D}_{\gamma/\rho}^{1/2} (\mathbf{I}_p - \mathbf{P}_0) \mathbf{D}_{\gamma/\rho}^{1/2} \mathbf{D}_\gamma^{-1/2}) (Z_n - \tilde{Z}_n)\| \\ &\leq \|\mathbf{I}_p - \mathbf{D}_{U, n} - \mathbf{D}_{\gamma/\rho}^{1/2} (\mathbf{I}_p - \mathbf{P}_0) \mathbf{D}_{\gamma/\rho}^{1/2}\| \|Z_n - \tilde{Z}_n\|_{\mathbf{D}_\gamma^{-1}} . \end{aligned}$$

Note that **H1** and **H2** and the fact that  $\mathbf{P}_0$  is an orthogonal projector, so  $\mathbf{0}_p \preceq \mathbf{I}_p - \mathbf{P}_0$ , imply that

$$\begin{aligned} \text{diag}(\{1 - \gamma_1(M_1 + 1/\rho_1)\} \mathbf{I}_{d_1}, \dots, \{1 - \gamma_b(M_b + 1/\rho_b)\} \mathbf{I}_{d_b}) &\preceq \mathbf{I}_p - \mathbf{D}_{U, n} - \mathbf{D}_{\gamma/\rho}^{1/2} (\mathbf{I}_p - \mathbf{P}_0) \mathbf{D}_{\gamma/\rho}^{1/2} \\ &\preceq \text{diag}(\{1 - \gamma_1 m_1\} \mathbf{I}_{d_1}, \dots, \{1 - \gamma_b m_b\} \mathbf{I}_{d_b}) . \end{aligned}$$

Therefore, we get

$$\begin{aligned} \|Z_{n+1} - \tilde{Z}_{n+1}\|_{\mathbf{D}_\gamma^{-1}} &\leq \max_{i \in [b]} \left\{ \max(|1 - \gamma_i m_i|, |1 - \gamma_i(M_i + 1/\rho_i)|) \right\} \|Z_n - \tilde{Z}_n\|_{\mathbf{D}_\gamma^{-1}} \\ &= \kappa_\gamma \|Z_n - \tilde{Z}_n\|_{\mathbf{D}_\gamma^{-1}}. \end{aligned} \quad (\text{S14})$$

An immediate induction shows, for any  $n \geq 1$ ,

$$\|Z_n - \tilde{Z}_n\|_{\mathbf{D}_\gamma^{-1}} \leq \kappa_\gamma^{n-1} \|Z_1 - \tilde{Z}_1\|_{\mathbf{D}_\gamma^{-1}}. \quad (\text{S15})$$

In addition, by (S13), we have for any  $i \in [b]$ ,

$$Z_1^i - \tilde{Z}_1^i = \left(1 - \frac{\gamma_i}{\rho_i}\right)(\mathbf{z}_i - \tilde{\mathbf{z}}_i) + \frac{\gamma_i}{\rho_i} \mathbf{A}_i(\boldsymbol{\theta} - \tilde{\boldsymbol{\theta}}) - \gamma_i(\nabla U_i(\mathbf{z}_i) - \nabla U_i(\tilde{\mathbf{z}}_i)).$$

It follows that  $Z_1 - \tilde{Z}_1 = (\mathbf{I}_p - \mathbf{D}_{\gamma/\rho} - \mathbf{D}_{U,0})(\mathbf{z} - \tilde{\mathbf{z}}) + \mathbf{D}_{\gamma/\rho} \tilde{\mathbf{D}}_0^{-1/2} \mathbf{B}_0(\boldsymbol{\theta} - \tilde{\boldsymbol{\theta}})$ . Using the triangle inequality and **H2** gives

$$\begin{aligned} \|Z_1 - \tilde{Z}_1\|_{\mathbf{D}_\gamma^{-1}} &\leq (\min_{i \in [b]} \{\gamma_i\})^{-1/2} \|(\mathbf{I}_p - \mathbf{D}_{\gamma/\rho} - \mathbf{D}_{U,0})(\mathbf{z} - \tilde{\mathbf{z}}) + (\mathbf{D}_{\gamma/\sqrt{\rho}} \mathbf{B}_0(\boldsymbol{\theta} - \tilde{\boldsymbol{\theta}}))\| \\ &\leq (\min_{i \in [b]} \{\gamma_i\})^{-1/2} \left[ \|\mathbf{I}_p - \mathbf{D}_{\gamma/\rho} - \mathbf{D}_{U,0}\| \|\mathbf{z} - \tilde{\mathbf{z}}\| + \|\mathbf{D}_{\gamma/\sqrt{\rho}} \mathbf{B}_0\| \|\boldsymbol{\theta} - \tilde{\boldsymbol{\theta}}\| \right] \\ &\leq (\min_{i \in [b]} \{\gamma_i\})^{-1/2} \left[ \max_{i \in [b]} \{|1 - \gamma_i(m_i + 1/\rho_i)|, |1 - \gamma_i(M_i + 1/\rho_i)|\} \|\mathbf{z} - \tilde{\mathbf{z}}\| \right. \\ &\quad \left. + \|\mathbf{D}_{\gamma/\sqrt{\rho}} \mathbf{B}_0\| \|\boldsymbol{\theta} - \tilde{\boldsymbol{\theta}}\| \right] \\ &\leq (\min_{i \in [b]} \{\gamma_i\})^{-1/2} \left[ \kappa_\gamma \|\mathbf{z} - \tilde{\mathbf{z}}\| + \|\mathbf{D}_{\gamma/\sqrt{\rho}} \mathbf{B}_0\| \|\boldsymbol{\theta} - \tilde{\boldsymbol{\theta}}\| \right]. \end{aligned}$$

Combining (S15) and the previous inequality and using Lemma S3, we get for  $n \geq 1$ ,

$$\begin{aligned} \|X_n - \tilde{X}_n\|^2 &\leq \kappa_\gamma^{2(n-1)} \left(1 + \|\bar{\mathbf{B}}_0^{-1} \mathbf{B}_0^\top \tilde{\mathbf{D}}_0^{1/2}\|^2\right) \frac{\max_{i \in [b]} \{\gamma_i\}}{\min_{i \in [b]} \{\gamma_i\}} \\ &\quad \times \left[ \kappa_\gamma \|\mathbf{z} - \tilde{\mathbf{z}}\| + \|\mathbf{D}_{\gamma/\sqrt{\rho}} \mathbf{B}_0\| \|\boldsymbol{\theta} - \tilde{\boldsymbol{\theta}}\| \right]^2. \end{aligned}$$

The proof is concluded by (S83).  $\square$

### S2.1.2. SPECIFIC CASE OF PROPOSITION 2

Based on the previous lemmata, we provide in what follows a specific instance of Proposition 2 in the scenario where  $\max_{i \in [b]} N_i = 1$ .

**Proposition S5.** Assume **H1-H2** and let  $\gamma \in (\mathbb{R}_+^*)^b$  such that, for any  $i \in [b]$ ,  $\gamma_i \leq 2(m_i + M_i + 1/\rho_i)^{-1}$ . Then,  $P_{\rho, \gamma}$  defined in (S7) admits a unique stationary distribution  $\Pi_{\rho, \gamma}$  and for any  $\mathbf{x} = (\mathbf{z}^\top, \boldsymbol{\theta}^\top)^\top$  with  $\boldsymbol{\theta} \in \mathbb{R}^d$ ,  $\mathbf{z} \in \mathbb{R}^p$  and any  $n \in \mathbb{N}^*$ , we have

$$\begin{aligned} W_2^2(\delta_{\mathbf{x}} P_{\rho, \gamma}^n, \Pi_{\rho, \gamma}) &\leq (1 - \min_{i \in [b]} \{\gamma_i m_i\})^{2(n-1)} \left( (1 + \|\bar{\mathbf{B}}_0^{-1} \mathbf{B}_0^\top \tilde{\mathbf{D}}_0^{1/2}\|^2) \cdot \frac{\max_{i \in [b]} \{\gamma_i\}}{\min_{i \in [b]} \{\gamma_i\}} \right) \\ &\quad \times \int_{\mathbb{R}^d \times \mathbb{R}^p} \left[ (1 - \min_{i \in [b]} \{\gamma_i m_i\}) \|\mathbf{z} - \tilde{\mathbf{z}}\| + \|\mathbf{D}_{\gamma/\sqrt{\rho}} \mathbf{B}_0\| \|\boldsymbol{\theta} - \tilde{\boldsymbol{\theta}}\| \right]^2 d\Pi_{\rho, \gamma}(\tilde{\mathbf{x}}), \end{aligned}$$

where  $\bar{\mathbf{B}}_0, \mathbf{B}_0, \tilde{\mathbf{D}}_0, P_{\rho, \gamma}$  are defined in (S2) and (S3).

*Proof.* For any  $i \in [b]$ , note that the condition  $0 < \gamma_i \leq 2(m_i + M_i + 1/\rho_i)^{-1}$  ensures that  $\kappa_\gamma = 1 - \min_{i \in [b]} \{\gamma_i m_i\} \in (0, 1)$  and the proof follows from Lemma S4 combined with Douc et al. (2018, Lemma 20.3.2, Theorem 20.3.4).  $\square$

## S2.2. Multiple local LMC iterations

In this section, we consider the general case  $\max_{i \in [b]} N_i \geq 1$ . For this, we introduce the conditional Markov transition kernel defined for any  $\gamma = (\gamma_1, \dots, \gamma_b)$ ,  $\mathbf{N} = (N_1, \dots, N_b)$ ,  $\boldsymbol{\theta} \in \mathbb{R}^d$ ,  $\mathbf{z} = (\mathbf{z}_1, \dots, \mathbf{z}_b) \in \mathbb{R}^{d_1} \times \dots \times \mathbb{R}^{d_b}$ , for  $i \in [b]$  and  $\mathbf{B}_i \in \mathcal{B}(\mathbb{R}^{d_i})$ , by

$$Q_{\rho, \gamma, \mathbf{N}}(\mathbf{z}, \mathbf{B}_1 \times \dots \times \mathbf{B}_b | \boldsymbol{\theta}) = \prod_{i=1}^b R_{\rho_i, \gamma_i}^{N_i}(\mathbf{z}_i, \mathbf{B}_i | \boldsymbol{\theta}), \quad (\text{S16})$$

where  $R_{\rho_i, \gamma_i}$  is defined by (S6). Then, as in the case  $\max_{i \in [b]} N_i = 1$ , the Gibbs sampler presented in Algorithm 1 defines a homogeneous Markov chain  $X_n^\top = (\theta_n^\top, Z_n^\top)_{n \geq 1}$  where  $Z_n^\top = ([Z_n^1]^\top, \dots, [Z_n^b]^\top)$ . Indeed, it is easy to show that for any  $n \in \mathbb{N}$  and measurable function  $f : \mathbb{R}^p \rightarrow \mathbb{R}_+$ ,  $\mathbb{E}[f(Z_{n+1}) | X_n] = \int_{\mathbb{R}^p} f(\mathbf{z}) Q_{\rho, \gamma, \mathbf{N}}(Z_n, d\mathbf{z} | \theta_n)$ . Therefore,  $(X_n)_{n \in \mathbb{N}}$  is associated with the Markov kernel defined, for any  $\mathbf{x}^\top = (\boldsymbol{\theta}^\top, \mathbf{z}^\top)$  and  $\mathbf{A} \in \mathcal{B}(\mathbb{R}^d)$ ,  $\mathbf{B} \in \mathcal{B}(\mathbb{R}^p)$ , by

$$P_{\rho, \gamma, \mathbf{N}}(\mathbf{x}, \mathbf{A} \times \mathbf{B}) = \int_{\mathbf{B}} Q_{\rho, \gamma, \mathbf{N}}(\mathbf{z}, d\tilde{\mathbf{z}} | \boldsymbol{\theta}) \int_{\mathbf{A}} \Pi_{\rho}(d\tilde{\boldsymbol{\theta}} | \tilde{\mathbf{z}}), \quad (\text{S17})$$

where  $\Pi_{\rho}(\cdot | \tilde{\mathbf{z}})$  is defined in (5). We now define a coupling between  $\delta_{\mathbf{x}} P_{\rho, \gamma, \mathbf{N}}^n$  and  $\delta_{\tilde{\mathbf{x}}} P_{\rho, \gamma, \mathbf{N}}^n$  for any  $n \geq 1$  and  $\mathbf{x}, \tilde{\mathbf{x}} \in \mathbb{R}^d \times \mathbb{R}^p$ . Let  $(\xi_n)_{n \geq 1}$  be a sequence of i.i.d.  $d$ -dimensional standard Gaussian random variables independent of the family of independent random variables  $\{(\eta_n^i)_{n \geq 1} : i \in [b]\}$  where for any  $i \in [b]$  and  $n \geq 1$ ,  $\eta_n^i$  is a  $d_i$ -dimensional standard Gaussian random variable. Define by induction the synchronous coupling  $(\theta_n, Z_n)_{n \geq 0}$ ,  $(\tilde{\theta}_n, \tilde{Z}_n)_{n \geq 0}$ , for any  $i \in [b]$  starting from  $(\theta_0, Z_0) = \mathbf{x} = (\boldsymbol{\theta}, \mathbf{z})$ ,  $(\tilde{\theta}_0, \tilde{Z}_0) = \tilde{\mathbf{x}} = (\tilde{\boldsymbol{\theta}}, \tilde{\mathbf{z}})$  and for any  $n \geq 0$  by

$$\begin{aligned} \tilde{Z}_{n+1}^i &= \tilde{Y}_{N_i}^{(i, n)}, & \tilde{\theta}_{n+1} &= \bar{\mathbf{B}}_0^{-1} \mathbf{B}_0^\top \tilde{\mathbf{D}}_0^{1/2} \tilde{Z}_{n+1} + \bar{\mathbf{B}}_0^{-1/2} \xi_{n+1}, \\ Z_{n+1}^i &= Y_{N_i}^{(i, n)}, & \theta_{n+1} &= \bar{\mathbf{B}}_0^{-1} \mathbf{B}_0^\top \tilde{\mathbf{D}}_0^{1/2} Z_{n+1} + \bar{\mathbf{B}}_0^{-1/2} \xi_{n+1}, \end{aligned} \quad (\text{S18})$$

where  $\bar{\mathbf{B}}_0, \mathbf{B}_0, \tilde{\mathbf{D}}_0$  are given by (S2)-(S3) and  $\tilde{Y}_0^{(i, n)} = \tilde{Z}_n^i$ ,  $Y_0^{(i, n)} = Z_n^i$ , and for any  $k \in \mathbb{N}$

$$\begin{aligned} \tilde{Y}_{k+1}^{(i, n)} &= \tilde{Y}_k^{(i, n)} - \gamma_i \nabla V_i(\tilde{Y}_k^{(i, n)}) + (\gamma_i / \rho_i) \mathbf{A}_i \tilde{\theta}_n + \sqrt{2\gamma_i} \eta_{k+1}^{(i, n)}, \\ Y_{k+1}^{(i, n)} &= Y_k^{(i, n)} - \gamma_i \nabla V_i(Y_k^{(i, n)}) + (\gamma_i / \rho_i) \mathbf{A}_i \theta_n + \sqrt{2\gamma_i} \eta_{k+1}^{(i, n)}, \end{aligned} \quad (\text{S19})$$

where, for any  $\mathbf{z}_i \in \mathbb{R}^{d_i}$ ,  $V_i$  is defined by

$$V_i(\mathbf{z}_i) = U_i(\mathbf{z}_i) + (2\rho_i)^{-1} \|\mathbf{z}_i\|^2. \quad (\text{S20})$$

For any  $n, k \in \mathbb{N}$  consider the  $p \times p$  matrices defined by

$$\begin{aligned} \mathbf{H}_{U, k}^{(n)} &= \text{diag} \left( \gamma_1 \int_0^1 \nabla^2 U_1((1-s)Y_k^{(1, n)} + s\tilde{Y}_k^{(1, n)}) ds, \right. \\ &\quad \left. \dots, \gamma_b \int_0^1 \nabla^2 U_b((1-s)Y_k^{(b, n)} + s\tilde{Y}_k^{(b, n)}) ds \right), \end{aligned}$$

$$\mathbf{J}(k) = \text{diag} \left( \mathbb{1}_{[N_1]}(k+1) \cdot \mathbf{I}_{d_1}, \dots, \mathbb{1}_{[N_b]}(k+1) \cdot \mathbf{I}_{d_b} \right), \quad (\text{S21})$$

$$\mathbf{C}_k^{(n)} = \mathbf{J}(k) (\mathbf{D}_{\gamma/\rho} + \mathbf{H}_{U, k}^{(n)}), \quad (\text{S22})$$

$$\mathbf{M}_{k+1}^{(n)} = (\mathbf{I}_p - \mathbf{C}_0^{(n)})^{-1} \dots (\mathbf{I}_p - \mathbf{C}_k^{(n)})^{-1}, \quad \text{with } \mathbf{M}_0^{(n)} = \mathbf{I}_p. \quad (\text{S23})$$

Under **H2**, we have  $\|\mathbf{C}_k^{(n)}\| \leq \max_{i \in [b]} \{\gamma_i (M_i + 1/\rho_i)\}$ , thus if we suppose that for any  $i \in [b]$ ,  $0 < \gamma_i < (M_i + 1/\rho_i)^{-1}$ , the matrix  $(\mathbf{I}_p - \mathbf{C}_k^{(n)})$  is invertible. In addition, for any  $n \in \mathbb{N}$ ,  $k \geq \max_{i \in [b]} \{N_i\}$ ,  $\mathbf{C}_k^{(n)} = \mathbf{0}_{p \times p}$ , hence the sequence  $(\mathbf{M}_k^{(n)})_{k \in \mathbb{N}}$  is stationary and we denote its limit by  $\mathbf{M}_\infty^{(n)}$  which is equal to  $\mathbf{M}_{\max_{i \in [b]} \{N_i\}}^{(n)}$ .

### S2.2.1. TECHNICAL LEMMATA

Similarly to Lemma S3, the following result shows that it is enough to consider the marginal process  $(Z_n, \tilde{Z}_n)_{n \geq 0}$  to control

$$W_2(\delta_{\mathbf{x}} P_{\rho, \gamma, \mathbf{N}}^n, \delta_{\tilde{\mathbf{x}}} P_{\rho, \gamma, \mathbf{N}}^n) \leq \mathbb{E} \left[ \|X_n - \tilde{X}_n\|^2 \right]^{1/2}. \quad (\text{S24})$$

**Lemma S6.** Assume **H1** and let  $\mathbf{N} \in (\mathbb{N}^*)^b, \gamma \in (\mathbb{R}_+^*)^b$ . Then, for any  $n \in \mathbb{N}$ , the random variables  $X_n = (\theta_n^\top, Z_n^\top)^\top, \tilde{X}_n = (\tilde{\theta}_n^\top, \tilde{Z}_n^\top)^\top$  defined in (S18) satisfy

$$\|\tilde{X}_{n+1} - X_{n+1}\|^2 \leq (1 + \|\bar{\mathbf{B}}_0^{-1} \mathbf{B}_0^\top \tilde{\mathbf{D}}_0^{1/2}\|^2) \|\tilde{Z}_{n+1} - Z_{n+1}\|^2,$$

where  $\bar{\mathbf{B}}_0, \mathbf{B}_0, \tilde{\mathbf{D}}_0$  are defined in (S2)-(S3).

*Proof.* The proof is similar to the proof of Lemma S3 and is omitted.  $\square$

To ease notation, for any  $i \in [b]$ , we consider all along this section the quantities

$$\tilde{m}_i = m_i + 1/\rho_i, \quad \tilde{M}_i = M_i + 1/\rho_i. \quad (\text{S25})$$

The following lemma provides an explicit expression for  $\|\tilde{Z}_{n+1} - Z_{n+1}\|$  with respect to  $\|\tilde{Z}_n - Z_n\|$ .

**Lemma S7.** Assume **H1-H2** and let  $\mathbf{N} \in (\mathbb{N}^*)^b, \gamma \in (\mathbb{R}_+^*)^b$  such that, for any  $i \in [b], \gamma_i < \tilde{M}_i^{-1}$ . Then, for any  $n \geq 1$ , we have

$$\begin{aligned} \|\tilde{Z}_{n+1} - Z_{n+1}\|_{\mathbf{D}_{\mathbf{N}\gamma}^{-1}} &\leq \left\| [\mathbf{M}_\infty^{(n)}]^{-1} + \sum_{k=0}^{\infty} [\mathbf{M}_\infty^{(n)}]^{-1} \mathbf{M}_{k+1}^{(n)} \mathbf{J}(k) \mathbf{D}_{\mathbf{N}}^{-1/2} \mathbf{D}_{\gamma/\rho}^{1/2} \mathbf{P}_0 \mathbf{D}_{\gamma/\rho}^{1/2} \mathbf{D}_{\mathbf{N}}^{1/2} \right\| \\ &\quad \times \|\tilde{Z}_n - Z_n\|_{\mathbf{D}_{\mathbf{N}\gamma}^{-1}}, \quad (\text{S26}) \end{aligned}$$

where  $(\mathbf{M}_k^{(n)})_{k \in \mathbb{N}}$  is defined in (S23),  $(\tilde{Z}_k, Z_k)_{k \in \mathbb{N}}$  in (S18),  $\mathbf{N}\gamma = (\gamma_1 N_1, \dots, \gamma_b N_b)$  and  $\gamma/\rho = (\gamma_1/\rho_1, \dots, \gamma_b/\rho_b)$ .

*Proof.* Let  $n \geq 1$ . By (S19), for any  $i \in [b], k \in \mathbb{N}$ , we obtain

$$\begin{aligned} \tilde{Y}_{k+1}^{(i,n)} - Y_{k+1}^{(i,n)} &= \left( \mathbf{I}_{d_i} - \gamma_i \int_0^1 \nabla^2 V_i((1-s)Y_k^{(i,n)} + s\tilde{Y}_k^{(i,n)}) ds \right) (\tilde{Y}_k^{(i,n)} - Y_k^{(i,n)}) \\ &\quad + (\gamma_i/\rho_i) \mathbf{A}_i (\tilde{\theta}_n - \theta_n). \end{aligned}$$

Consider the process  $((\tilde{Y}_k^{(n)}, Y_k^{(n)}) = \{\tilde{Y}_k^{(i,n)}, Y_k^{(i,n)}\}_{i=1}^b)_{k \in \mathbb{N}}$  with values in  $\mathbb{R}^p \times \mathbb{R}^p$  defined for any  $i \in [b], k \geq 0$ , by

$$\tilde{Y}_k^{(i,n)} = \tilde{Y}_{\min(k, N_i)}^{(i,n)}, \quad Y_k^{(i,n)} = Y_{\min(k, N_i)}^{(i,n)}. \quad (\text{S27})$$

By (S18), we have  $\mathbf{A}_i(\tilde{\theta}_n - \theta_n) = \mathbf{A}_i \bar{\mathbf{B}}_0^{-1} \mathbf{B}_0^\top \tilde{\mathbf{D}}_0^{1/2} (\tilde{Z}_n - Z_n)$ . Since  $\mathbf{B}_0^\top = [\mathbf{A}_1^\top/\rho_1^{1/2} \cdots \mathbf{A}_b^\top/\rho_b^{1/2}]$  and  $\mathbf{P}_0 = \mathbf{B}_0 \bar{\mathbf{B}}_0^{-1} \mathbf{B}_0^\top$  is the orthogonal projection matrix defined in (S3), it follows that

$$\tilde{Y}_{k+1}^{(n)} - Y_{k+1}^{(n)} = (\mathbf{I}_p - \mathbf{C}_k^{(n)}) (\tilde{Y}_k^{(n)} - Y_k^{(n)}) + \mathbf{J}(k) \mathbf{D}_{\gamma/\sqrt{\rho}} \mathbf{P}_0 \tilde{\mathbf{D}}_0^{1/2} (\tilde{Y}_0^{(n)} - Y_0^{(n)}). \quad (\text{S28})$$

Since  $\mathbf{D}_{\mathbf{N}\gamma}$  commutes with  $\mathbf{C}_k^{(n)}$  and  $\mathbf{J}(k)$ , multiplying (S28) by  $\mathbf{M}_{k+1}^{(n)} \mathbf{D}_{\mathbf{N}\gamma}^{-1/2}$ , yields

$$\begin{aligned} \mathbf{M}_{k+1}^{(n)} \mathbf{D}_{\mathbf{N}\gamma}^{-1/2} (\tilde{Y}_{k+1}^{(n)} - Y_{k+1}^{(n)}) &= \mathbf{M}_k^{(n)} \mathbf{D}_{\mathbf{N}\gamma}^{-1/2} (\tilde{Y}_k^{(n)} - Y_k^{(n)}) \\ &\quad + \mathbf{M}_{k+1}^{(n)} \mathbf{J}(k) \mathbf{D}_{\mathbf{N}}^{-1/2} \mathbf{D}_{\gamma/\rho}^{1/2} \mathbf{P}_0 \tilde{\mathbf{D}}_0^{1/2} (\tilde{Y}_0^{(n)} - Y_0^{(n)}). \quad (\text{S29}) \end{aligned}$$

By definition of the processes in (S18)-(S19) and (S27), we have for  $k \geq \max_{i \in [b]} \{N_i\}$ ,  $(\tilde{Y}_k^{(n)}, Y_k^{(n)}) = (\tilde{Z}_{n+1}, Z_{n+1})$  and  $\mathbf{J}(k) = \mathbf{0}_{p \times p}$ . Therefore summing the previous equality (S29) yields

$$\begin{aligned} \mathbf{M}_\infty^{(n)} \mathbf{D}_{\mathbf{N}\gamma}^{-1/2} (\tilde{Z}_{n+1} - Z_{n+1}) &= [\mathbf{M}_0^{(n)} + \sum_{k=0}^{\infty} \mathbf{M}_{k+1}^{(n)} \mathbf{J}(k) \mathbf{D}_{\mathbf{N}}^{-1/2} \mathbf{D}_{\gamma/\rho}^{1/2} \mathbf{P}_0 \mathbf{D}_{\gamma/\rho}^{1/2} \mathbf{D}_{\mathbf{N}}^{1/2}] \\ &\quad \times \mathbf{D}_{\mathbf{N}\gamma}^{-1/2} (\tilde{Y}_0^{(n)} - Y_0^{(n)}). \end{aligned}$$

Multiplying this last equality by  $[\mathbf{M}_\infty^{(n)}]^{-1}$  and applying the norm  $\|\cdot\|_{\mathbf{D}_{\mathbf{N}\gamma}^{-1}}$  concludes the proof.  $\square$



The three following lemmata aim at providing an explicit upper bound on (S26). To this end, for  $n, k \in \mathbb{N}$  and  $i \in [b]$ , consider  $\mathbf{C}_k^{(i,n)}$  corresponding to the  $i$ -th diagonal block of  $\mathbf{C}_k^{(n)}$  defined in (S22), i.e.

$$\mathbf{C}_k^{(i,n)} = \mathbf{1}_{[N_i]}(k+1)\gamma_i \left\{ \rho_i^{-1} \mathbf{I}_{d_i} + \int_0^1 \nabla^2 U_i((1-s)Y_k^{(i,n)} + s\tilde{Y}_k^{(i,n)}) ds \right\} \in \mathbb{R}^{d_i \times d_i}, \quad (\text{S30})$$

where, for any  $n \in \mathbb{N}$  and  $i \in [b]$ ,  $(Y_k^{(i,n)}, \tilde{Y}_k^{(i,n)})_{k \in \mathbb{N}}$  is defined in (S19). Thus, using the definition (S23) of  $\mathbf{M}_k^{(n)}$ , we can write  $[\mathbf{M}_\infty^{(n)}]^{-1} \mathbf{M}_k^{(n)}$  as a block-diagonal matrix  $\text{diag}(([\mathbf{M}_\infty^{(n)}]^{-1} \mathbf{M}_k^{(n)})^1, \dots, ([\mathbf{M}_\infty^{(n)}]^{-1} \mathbf{M}_k^{(n)})^b)$  where for any  $i \in [b]$ ,  $([\mathbf{M}_\infty^{(n)}]^{-1} \mathbf{M}_k^{(n)})^i = \prod_{l=k}^{N_i-1} (\mathbf{I}_{d_i} - \mathbf{C}_l^{(i,n)}) \in \mathbb{R}^{d_i \times d_i}$ .

**Lemma S8.** Assume **H1-H2** and let  $\mathbf{N} \in (\mathbb{R}_+^*)^b$ ,  $\gamma \in (\mathbb{R}_+^*)^b$  such that, for any  $i \in [b]$ ,  $\gamma_i < \tilde{M}_i^{-1}$ . Then, for any  $i \in [b]$ ,  $n \in \mathbb{N}$  and  $k \in [N_i]$ , we have

$$\|([\mathbf{M}_\infty^{(n)}]^{-1} \mathbf{M}_k^{(n)})^i - \mathbf{I}_{d_i} - \sum_{l=k}^\infty \mathbf{C}_l^{(i,n)}\| \leq \exp\{(N_i - k)\gamma_i \tilde{M}_i\} - 1 - (N_i - k)\gamma_i \tilde{M}_i,$$

where  $\mathbf{M}_k^{(n)}$ ,  $\tilde{M}_i$  are defined in (S23), (S25) respectively, and  $\mathbf{M}_\infty^{(n)}$  is the limit of the stationnary sequence  $(\mathbf{M}_k^{(n)})_{k \in \mathbb{N}}$ .

*Proof.* Let  $n \in \mathbb{N}$ ,  $i \in [b]$  and  $k \in [N_i]$ . The approximation error between  $\prod_{l=k}^\infty (\mathbf{I}_{d_i} - \mathbf{C}_l^{(i,n)})$  and its linear approximation can be upper bounded as

$$\begin{aligned} \left\| \prod_{l=k}^\infty (\mathbf{I}_{d_i} - \mathbf{C}_l^{(i,n)}) - \mathbf{I}_{d_i} - \sum_{l=k}^\infty \mathbf{C}_l^{(i,n)} \right\| &= \left\| \sum_{m=2}^\infty (-1)^m \sum_{k \leq l_1 < \dots < l_m} \mathbf{C}_{l_1}^{(i,n)} \dots \mathbf{C}_{l_m}^{(i,n)} \right\| \\ &\leq \sum_{m=2}^\infty \sum_{k \leq l_1 < \dots < l_m} \|\mathbf{C}_{l_1}^{(i,n)}\| \dots \|\mathbf{C}_{l_m}^{(i,n)}\| = \prod_{l=k}^\infty (1 + \|\mathbf{C}_l^{(i,n)}\|) - 1 - \sum_{l \geq k} \|\mathbf{C}_l^{(i,n)}\| \\ &\leq \exp\left(\sum_{l=k}^\infty \|\mathbf{C}_l^{(i,n)}\|\right) - 1 - \sum_{l=k}^\infty \|\mathbf{C}_l^{(i,n)}\|, \end{aligned}$$

where the products and the sums are well defined since for any  $l \geq N_i$ , we have  $\mathbf{C}_l^{(i,n)} = \mathbf{0}_{d_i}$ . Finally, the proof is concluded using that  $x \mapsto \exp(x) - 1 - x$  is increasing on  $\mathbb{R}$  and for  $l \in \mathbb{N}$ ,  $\|\mathbf{C}_l^{(i,n)}\| \leq \gamma_i \tilde{M}_i \mathbf{1}_{[N_i]}(l+1)$  from **H2-(i)**.  $\square$

For any  $\mathbf{N} = (N_1, \dots, N_b) \in (\mathbb{N}^*)^b$ ,  $\gamma = (\gamma_1, \dots, \gamma_b) \in (\mathbb{R}_+^*)^b$ , define the  $p \times p$  block matrices

$$\begin{aligned} \mathbf{S}_1 &= \text{diag}(\{1 - N_1 \gamma_1 \tilde{M}_1\} \mathbf{I}_{d_1}, \dots, \{1 - N_b \gamma_b \tilde{M}_b\} \mathbf{I}_{d_b}), \\ \mathbf{S}_2 &= \mathbf{I}_p - \sum_{l=0}^\infty \mathbf{J}(l) \mathbf{H}_{U,l}^{(n)} - (\mathbf{D}_N \mathbf{D}_{\gamma/\rho})^{1/2} (\mathbf{I}_p - \mathbf{P}_0) (\mathbf{D}_N \mathbf{D}_{\gamma/\rho})^{1/2}, \\ \mathbf{S}_3 &= \text{diag}(\{1 - N_1 \gamma_1 m_1\} \mathbf{I}_{d_1}, \dots, \{1 - N_b \gamma_b m_b\} \mathbf{I}_{d_b}), \end{aligned} \quad (\text{S31})$$

where for any  $i \in [b]$ ,  $\tilde{M}_i$  is defined in (S25) and  $\mathbf{P}_0, \mathbf{J}(l), \mathbf{H}_{U,l}^{(n)}$  are defined in (S3), (S86), (S87), respectively.

**Lemma S9.** Assume **H1-H2**. Then, for any  $\mathbf{N} \in (\mathbb{N}^*)^b$ ,  $\gamma \in (\mathbb{R}_+^*)^b$ , we have

$$\mathbf{S}_1 \preceq \mathbf{S}_2 \preceq \mathbf{S}_3.$$

As a result, under the additional assumption, for any  $i \in [b]$ ,  $\gamma_i N_i \leq 2/(m_i + M_i + 1/\rho_i)$ , we get

$$\|\mathbf{S}_2\| \leq 1 - \min_{i \in [b]} \{N_i \gamma_i m_i\}. \quad (\text{S32})$$

*Proof.* Since  $\mathbf{P}_0$  is an orthogonal projection defined in (S3), we have  $\mathbf{P}_0 \preceq \mathbf{I}_p$ , therefore we easily get

$$\mathbf{0}_{p \times p} \preceq (\mathbf{D}_N \mathbf{D}_{\gamma/\rho})^{1/2} (\mathbf{I}_p - \mathbf{P}_0) (\mathbf{D}_N \mathbf{D}_{\gamma/\rho})^{1/2} \preceq \mathbf{D}_N \mathbf{D}_{\gamma/\rho}$$

and **H2-(i)-(ii)** imply

$$\text{diag}(N_1\gamma_1 m_1 \mathbf{I}_{d_1}, \dots, N_b\gamma_b m_b \mathbf{I}_{d_b}) \preceq \sum_{l=0}^{\infty} \mathbf{J}(l) \mathbf{H}_{U,l}^{(n)} \preceq \text{diag}(N_1\gamma_1 M_1 \mathbf{I}_{d_1}, \dots, N_b\gamma_b M_b \mathbf{I}_{d_b}).$$

Subtracting these previous inequalities and adding  $\mathbf{I}_p$  complete the first part of the proof. The additional condition, for any  $i \in [b]$ ,  $\gamma_i N_i \leq 2/(m_i + M_i + 1/\rho_i)$ , ensures that  $\mathbf{S}_1$  is definite-positive. Since  $\mathbf{S}_1 \preceq \mathbf{S}_2$ , we deduce that  $\mathbf{S}_2$  is symmetric positive-definite as well. Then,  $\|\mathbf{S}_2\|$  is equal to the largest eigenvalue of  $\mathbf{S}_2$ . The inequality  $\mathbf{S}_2 \preceq \mathbf{S}_3$  concludes the second part of the proof.  $\square$

For any  $\mathbf{N} = (N_1, \dots, N_b) \in (\mathbb{N}^*)^b$ ,  $\boldsymbol{\gamma} = (\gamma_1, \dots, \gamma_b) \in (\mathbb{R}_+^*)^b$ , define

$$r_{\boldsymbol{\gamma}, \boldsymbol{\rho}, \mathbf{N}} = \max_{i \in [b]} \{N_i \gamma_i / \rho_i\} \max_{i \in [b]} \{N_i \gamma_i \tilde{M}_i\} \left( 1/2 + \max_{i \in [b]} \{N_i \gamma_i \tilde{M}_i\} \right) + 4 \max_{i \in [b]} \{N_i \gamma_i \tilde{M}_i\}^2, \quad (\text{S33})$$

where  $\tilde{M}_i$  is defined in (S25).

**Lemma S10.** Assume **H1-H2**. Let  $\mathbf{N} \in (\mathbb{N}^*)^b$ ,  $\boldsymbol{\gamma} \in (\mathbb{R}_+^*)^b$  such that, for any  $i \in [b]$ ,  $N_i \gamma_i \leq 2/(m_i + \tilde{M}_i)$  and  $\gamma_i < \tilde{M}_i^{-1}$ . Then, for any  $n \in \mathbb{N}$ , we have

$$\|[\mathbf{M}_\infty^{(n)}]^{-1} + \sum_{k=0}^{\infty} [\mathbf{M}_\infty^{(n)}]^{-1} \mathbf{M}_{k+1}^{(n)} \mathbf{J}(k) \mathbf{D}_N^{-1/2} \mathbf{D}_{\boldsymbol{\gamma}/\boldsymbol{\rho}}^{1/2} \mathbf{P}_0 \mathbf{D}_{\boldsymbol{\gamma}/\boldsymbol{\rho}}^{1/2} \mathbf{D}_N^{1/2}\| \leq 1 - \min_{i \in [b]} \{N_i \gamma_i m_i\} + r_{\boldsymbol{\gamma}, \boldsymbol{\rho}, \mathbf{N}},$$

where  $\mathbf{P}_0$ ,  $\mathbf{D}_{\boldsymbol{\gamma}/\boldsymbol{\rho}}$ ,  $\mathbf{J}(k)$ ,  $\mathbf{M}_k^{(n)}$  and  $r_{\boldsymbol{\gamma}, \boldsymbol{\rho}, \mathbf{N}}$  are defined in (S3), (S21), (S23) and (S33), respectively.

*Proof.* Let  $n \in \mathbb{N}$ . For any  $k \in \mathbb{N}$ , define

$$\mathbf{R}_k^{(n)} = \prod_{l=k}^{\infty} (\mathbf{I}_p - \mathbf{C}_l^{(n)}) - \mathbf{I}_p + \sum_{l=k}^{\infty} \mathbf{C}_l^{(n)}, \quad \mathbf{R}_k^{(i,n)} = \prod_{l=k}^{\infty} (\mathbf{I}_{d_i} - \mathbf{C}_l^{(i,n)}) - \mathbf{I}_{d_i} + \sum_{l=k}^{\infty} \mathbf{C}_l^{(i,n)}, \quad i \in [b], \quad (\text{S34})$$

where  $(\mathbf{C}_l^{(i,n)})_{l \in \mathbb{N}}$  is defined in (S30) and remark that the products and the sums are well defined since for any  $l \geq N_i$ , we have  $\mathbf{C}_l^{(i,n)} = \mathbf{0}_{d_i}$ . By noting, for any  $k \in [\max_{i \in [b]} N_i]$ , that  $[\mathbf{M}_\infty^{(n)}]^{-1} \mathbf{M}_k^{(n)} = \prod_{l=k}^{\infty} (\mathbf{I}_p - \mathbf{C}_l^{(n)})$ , it follows that  $[\mathbf{M}_\infty^{(n)}]^{-1} \mathbf{M}_k^{(n)} = \mathbf{I}_p - \sum_{l=k}^{\infty} \mathbf{C}_l^{(n)} + \mathbf{R}_k^{(n)}$ . Since for any  $i \in [b]$ ,  $l \geq N_i$ ,  $\mathbf{R}_k^{(i,n)} = \mathbf{0}_{d_i}$ , thus we have  $\mathbf{J}(k) \mathbf{R}_{k+1}^{(n)} = \mathbf{R}_{k+1}^{(n)}$ . In addition, using that  $\mathbf{M}_0^{(n)} = \mathbf{I}_p$ ,  $\mathbf{C}_l^{(n)} = \mathbf{J}(l) (\mathbf{D}_{\boldsymbol{\gamma}/\boldsymbol{\rho}} + \mathbf{H}_{U,l}^{(n)})$ ,  $\mathbf{D}_N = \sum_{k=0}^{\infty} \mathbf{J}(k)$ ,  $\mathbf{D}_N \mathbf{C}_l^{(n)} = \mathbf{C}_l^{(n)} \mathbf{D}_N$ , we get

$$\begin{aligned} & [\mathbf{M}_\infty^{(n)}]^{-1} + \sum_{k=0}^{\infty} [\mathbf{M}_\infty^{(n)}]^{-1} \mathbf{M}_{k+1}^{(n)} \mathbf{J}(k) \mathbf{D}_N^{-1/2} \mathbf{D}_{\boldsymbol{\gamma}/\boldsymbol{\rho}}^{1/2} \mathbf{P}_0 \mathbf{D}_{\boldsymbol{\gamma}/\boldsymbol{\rho}}^{1/2} \mathbf{D}_N^{1/2} \\ &= \mathbf{I}_p - \sum_{l=0}^{\infty} \mathbf{C}_l^{(n)} + \sum_{k=0}^{\infty} \mathbf{J}(k) \mathbf{D}_N^{-1/2} \mathbf{D}_{\boldsymbol{\gamma}/\boldsymbol{\rho}}^{1/2} \mathbf{P}_0 \mathbf{D}_{\boldsymbol{\gamma}/\boldsymbol{\rho}}^{1/2} \mathbf{D}_N^{1/2} - \sum_{k=0}^{\infty} \sum_{l=k+1}^{\infty} \mathbf{J}(k) \mathbf{D}_N^{-1/2} \mathbf{C}_l^{(n)} \mathbf{D}_{\boldsymbol{\gamma}/\boldsymbol{\rho}}^{1/2} \mathbf{P}_0 \mathbf{D}_{\boldsymbol{\gamma}/\boldsymbol{\rho}}^{1/2} \mathbf{D}_N^{1/2} \\ &\quad + \mathbf{R}_0^{(n)} + \sum_{k=0}^{\infty} \mathbf{R}_{k+1}^{(n)} \mathbf{J}(k) \mathbf{D}_N^{-1/2} \mathbf{D}_{\boldsymbol{\gamma}/\boldsymbol{\rho}}^{1/2} \mathbf{P}_0 \mathbf{D}_{\boldsymbol{\gamma}/\boldsymbol{\rho}}^{1/2} \mathbf{D}_N^{1/2} \\ &= \mathbf{I}_p - \sum_{l=0}^{\infty} \mathbf{J}(l) \mathbf{H}_{U,l}^{(n)} - \left( \sum_{k=0}^{\infty} \mathbf{J}(k) \right) \mathbf{D}_N^{-1/2} \mathbf{D}_{\boldsymbol{\gamma}/\boldsymbol{\rho}}^{1/2} (\mathbf{I}_p - \mathbf{P}_0) \mathbf{D}_{\boldsymbol{\gamma}/\boldsymbol{\rho}}^{1/2} \mathbf{D}_N^{1/2} \\ &\quad - \sum_{l=1}^{\infty} \left( \sum_{k=0}^{l-1} \mathbf{J}(k) \right) \mathbf{D}_N^{-1/2} \mathbf{C}_l^{(n)} \mathbf{D}_{\boldsymbol{\gamma}/\boldsymbol{\rho}}^{1/2} \mathbf{P}_0 \mathbf{D}_{\boldsymbol{\gamma}/\boldsymbol{\rho}}^{1/2} \mathbf{D}_N^{1/2} + \mathbf{R}_0^{(n)} + \sum_{k=0}^{\infty} \mathbf{J}(k) \mathbf{D}_N^{-1/2} \mathbf{R}_{k+1}^{(n)} \mathbf{D}_{\boldsymbol{\gamma}/\boldsymbol{\rho}}^{1/2} \mathbf{P}_0 \mathbf{D}_{\boldsymbol{\gamma}/\boldsymbol{\rho}}^{1/2} \mathbf{D}_N^{1/2} \\ &= \mathbf{S}_2 - \sum_{l=1}^{\infty} \left( \sum_{k=0}^{l-1} \mathbf{J}(k) \right) \mathbf{D}_N^{-1} \mathbf{C}_l^{(n)} (\mathbf{D}_N \mathbf{D}_{\boldsymbol{\gamma}/\boldsymbol{\rho}})^{1/2} \mathbf{P}_0 (\mathbf{D}_{\boldsymbol{\gamma}/\boldsymbol{\rho}} \mathbf{D}_N)^{1/2} \\ &\quad + \mathbf{R}_0^{(n)} + \sum_{k=1}^{\infty} \mathbf{D}_N^{-1} \mathbf{R}_k^{(n)} (\mathbf{D}_N \mathbf{D}_{\boldsymbol{\gamma}/\boldsymbol{\rho}})^{1/2} \mathbf{P}_0 (\mathbf{D}_{\boldsymbol{\gamma}/\boldsymbol{\rho}} \mathbf{D}_N)^{1/2}, \end{aligned} \quad (\text{S35})$$

where  $\mathbf{S}_2$  is defined in (S31). We now bound the different terms of (S35) separately. First, using (S32), we have

$$\|\mathbf{S}_2\| \leq 1 - \min_{i \in [b]} \{N_i \gamma_i m_i\}. \quad (\text{S36})$$

By recalling  $\mathbf{R}_0^{(n)}$  defined in (S34), Lemma S8 shows that

$$\|\mathbf{R}_0^{(n)}\| \leq \max_{i \in [b]} \|\mathbf{R}_0^{(i,n)}\| = \max_{i \in [b]} \left\{ \left\| \prod_{l=0}^{\infty} (\mathbf{I}_{d_i} - \mathbf{C}_l^{(i,n)}) - \mathbf{I}_{d_i} - \sum_{l=0}^{\infty} \mathbf{C}_l^{(i,n)} \right\| \right\} \quad (\text{S37})$$

$$\leq \max_{i \in [b]} \left\{ \exp \left( \sum_{l=0}^{\infty} \|\mathbf{C}_l^{(i,n)}\| \right) - 1 - \sum_{l=0}^{\infty} \|\mathbf{C}_l^{(i,n)}\| \right\} \quad (\text{S38})$$

$$\leq \max_{i \in [b]} \left\{ \exp\{(N_i - 1)\gamma_i \tilde{M}_i\} - 1 - (N_i - 1)\gamma_i \tilde{M}_i \right\} \quad (\text{S39})$$

$$\leq \max_{i \in [b]} \{((N_i - 1)\gamma_i \tilde{M}_i)^2 e^{(N_i - 1)\gamma_i \tilde{M}_i}\} / 2 \quad (\text{S40})$$

$$\leq 4 \max_{i \in [b]} \{(N_i - 1)\gamma_i \tilde{M}_i\}^2, \quad (\text{S41})$$

where, in the penultimate line, we used for any  $t \geq 0$ , that  $\exp(t) - 1 - t \leq t^2 \exp(t)/2$ . Regarding the second term of (S35), using that  $\mathbf{P}_0$  is an orthogonal projector, we get

$$\left\| \sum_{l=1}^{\infty} \left( \sum_{k=0}^{l-1} \mathbf{J}(k) \right) \mathbf{D}_N^{-1} \mathbf{C}_l^{(n)} (\mathbf{D}_N \mathbf{D}_{\gamma/\rho})^{1/2} \mathbf{P}_0 (\mathbf{D}_N \mathbf{D}_{\gamma/\rho})^{1/2} \right\| \leq \max_{i \in [b]} \left( \frac{N_i \gamma_i}{\rho_i} \right) \left\| \sum_{l=1}^{\infty} \left( \sum_{k=0}^{l-1} \mathbf{J}(k) \right) \mathbf{D}_N^{-1} \mathbf{C}_l^{(n)} \right\|.$$

Combining the following upper bound

$$\left\| \sum_{l=1}^{\infty} \left( \sum_{k=0}^{l-1} \mathbf{J}(k) \right) \mathbf{D}_N^{-1} \mathbf{C}_l^{(n)} \right\| \leq \max_{i \in [b]} \left\{ \frac{1}{N_i} \sum_{l=1}^{\infty} l \|\mathbf{C}_l^{(i,n)}\| \right\}$$

with the fact, for any  $i \in [b]$ , that  $\|\mathbf{C}_l^{(i,n)}\| \leq \gamma_i \tilde{M}_i \mathbf{1}_{[N_i]}(l+1)$ , we get that

$$\left\| \sum_{l=1}^{\infty} \left( \sum_{k=0}^{l-1} \mathbf{J}(k) \right) \mathbf{D}_N^{-1} \mathbf{C}_l^{(n)} (\mathbf{D}_N \mathbf{D}_{\gamma/\rho})^{1/2} \mathbf{P}_0 (\mathbf{D}_N \mathbf{D}_{\gamma/\rho})^{1/2} \right\| \leq \max_{i \in [b]} \left( \frac{N_i \gamma_i}{\rho_i} \right) \max_{i \in [b]} \left\{ \frac{N_i \gamma_i \tilde{M}_i}{2} \right\}. \quad (\text{S42})$$

To upper bound the last term of (S35), we start from the following inequality

$$\left\| \sum_{k=1}^{\infty} \mathbf{D}_N^{-1} \mathbf{R}_k^{(n)} \right\| \leq \max_{i \in [b]} \left\{ \frac{1}{N_i} \sum_{k=1}^{N_i-1} \|\mathbf{R}_k^{(i,n)}\| \right\}.$$

Lemma S8 shows that for any  $k \in [N_i - 1]$  and  $i \in [b]$ ,  $\|\mathbf{R}_k^{(i,n)}\| \leq \exp\{(N_i - k)\gamma_i \tilde{M}_i\} - 1 - (N_i - k)\gamma_i \tilde{M}_i$ . Then, for any  $i \in [b]$ , we have

$$\begin{aligned} \frac{1}{N_i} \sum_{k=1}^{N_i-1} \|\mathbf{R}_k^{(i,n)}\| &\leq \frac{1}{N_i} \sum_{k=1}^{N_i-1} [\exp\{(N_i - k)\gamma_i \tilde{M}_i\} - 1 - (N_i - k)\gamma_i \tilde{M}_i] \\ &\leq (N_i \gamma_i \tilde{M}_i)^{-1} \int_0^{N_i \gamma_i \tilde{M}_i} (e^t - 1 - t) dt \leq \frac{(N_i \gamma_i \tilde{M}_i)^2}{12} (e^{N_i \gamma_i \tilde{M}_i} + 1) \\ &\leq \max_{i \in [b]} \{(N_i \gamma_i \tilde{M}_i)^2\}, \end{aligned} \quad (\text{S43})$$

where we have used  $e^2 + 1 \leq 12$ . Plugging (S43), (S42), (S41) into (S32), we get

$$\left\| [\mathbf{M}_\infty^{(n)}]^{-1} + \sum_{k \in \mathbb{N}} [\mathbf{M}_\infty^{(n)}]^{-1} \mathbf{M}_{k+1}^{(n)} \mathbf{J}(k) \mathbf{D}_N^{-1/2} \mathbf{D}_{\gamma/\rho}^{1/2} \mathbf{P}_0 \mathbf{D}_{\gamma/\rho}^{1/2} \mathbf{D}_N^{1/2} \right\| \leq 1 - \min_{i \in [b]} \{N_i \gamma_i m_i\} + r_{\gamma, \rho, N},$$

where  $r_{\gamma, \rho, N}$  is defined in (S33).  $\square$

**Lemma S11.** Assume H1-H2. Let  $N \in (\mathbb{N}^*)^b$ ,  $\gamma \in (\mathbb{R}_+^*)^b$  such that, for any  $i \in [b]$ ,  $N_i \gamma_i \leq 2/(m_i + \tilde{M}_i)$  and  $\gamma_i < \tilde{M}_i^{-1}$ . Then, for any  $\mathbf{x} = (\mathbf{z}^\top, \boldsymbol{\theta}^\top)^\top$ ,  $\tilde{\mathbf{x}} = (\tilde{\mathbf{z}}^\top, \tilde{\boldsymbol{\theta}}^\top)^\top \in \mathbb{R}^{p+d}$ , with  $(\boldsymbol{\theta}, \tilde{\boldsymbol{\theta}}) \in (\mathbb{R}^d)^2$ ,  $(\mathbf{z}, \tilde{\mathbf{z}}) \in (\mathbb{R}^p)^2$  and any  $n \geq 1$  we have

$$\begin{aligned} W_2^2(\delta_{\tilde{\mathbf{x}}} P_{\rho, \gamma, N}^n, \delta_{\mathbf{x}} P_{\rho, \gamma, N}^n) &\leq (1 - \min_{i \in [b]} \{N_i \gamma_i m_i\} + r_{\gamma, \rho, N})^{2n-2} (1 + \|\bar{\mathbf{B}}_0^{-1} \mathbf{B}_0^\top \tilde{\mathbf{D}}_0^{1/2}\|^2) \\ &\quad \times \frac{\max_{i \in [b]} \{N_i \gamma_i\}}{\min_{i \in [b]} \{N_i \gamma_i\}} \left[ \left\| [\mathbf{M}_\infty^{(0)}]^{-1} \right\| \|\tilde{\mathbf{z}} - \mathbf{z}\| + (\sum_{i \in [b]} \|\mathbf{A}_i\|/\rho_i) \|\tilde{\boldsymbol{\theta}} - \boldsymbol{\theta}\| \right]^2, \end{aligned}$$

where  $\mathbf{B}_0, \bar{\mathbf{B}}_0, \tilde{\mathbf{D}}_0, P_{\rho, \gamma, N}, \mathbf{M}_\infty^{(0)}, r_{\gamma, \rho, N}$  are defined in (S2), (S3), (S17), (S23), (S33), respectively.

*Proof.* Combining Lemma S7 and Lemma S10, we have for  $n \geq 1$ ,

$$\|\tilde{Z}_{n+1} - Z_{n+1}\|_{\mathbf{D}_{N\gamma}^{-1}} \leq (1 - \min_{i \in [b]} \{N_i \gamma_i m_i\} + r_{\gamma, \rho, N}) \|\tilde{Z}_n - Z_n\|_{\mathbf{D}_{N\gamma}^{-1}}.$$

Thereby, for any  $n \geq 1$ , we obtain by induction

$$\|\tilde{Z}_n - Z_n\|_{\mathbf{D}_{N\gamma}^{-1}} \leq (1 - \min_{i \in [b]} \{N_i \gamma_i m_i\} + r_{\gamma, \rho, N})^{n-1} \|\tilde{Z}_1 - Z_1\|_{\mathbf{D}_{N\gamma}^{-1}}. \quad (\text{S44})$$

Define the process  $((\tilde{Y}_k^{(0)}, Y_k^{(0)}) = \{\tilde{Y}_k^{(i,0)}, Y_k^{(i,0)}\}_{i=1}^b)_{k \in \mathbb{N}}$  with values in  $\mathbb{R}^p \times \mathbb{R}^p$  defined for any  $i \in [b]$ ,  $k \geq 0$  by

$$\tilde{Y}_k^{(i,0)} = \tilde{Y}_{\min(k, N_i)}^{(i,0)}, \quad Y_k^{(i,0)} = Y_{\min(k, N_i)}^{(i,0)}.$$

By (S18), it follows that for any  $i \in [b]$ ,  $(\tilde{Z}_1^i, Z_1^i) = (\tilde{Y}_{N_i}^{(i,0)}, Y_{N_i}^{(i,0)})$  where  $(\tilde{Y}_0^{(i,0)}, Y_0^{(i,0)}) = (\tilde{Z}_0^i, Z_0^i)$ . We get by (S19) for  $k \geq 0$ ,

$$\tilde{Y}_{k+1}^{(0)} - Y_{k+1}^{(0)} = (\mathbf{I}_p - \mathbf{C}_k^{(0)}) (\tilde{Y}_k^{(0)} - Y_k^{(0)}) + \mathbf{J}(k) \mathbf{D}_{\gamma/\sqrt{\rho}} \mathbf{B}_0 (\tilde{\boldsymbol{\theta}}_0 - \boldsymbol{\theta}_0).$$

Hence, for  $k \geq 0$ , we obtain

$$\mathbf{M}_{k+1}^{(0)} \mathbf{D}_{N\gamma}^{-1/2} (\tilde{Y}_{k+1}^{(0)} - Y_{k+1}^{(0)}) = \mathbf{M}_k^{(0)} \mathbf{D}_{N\gamma}^{-1/2} (\tilde{Y}_k^{(0)} - Y_k^{(0)}) + \mathbf{M}_{k+1}^{(0)} \mathbf{J}(k) \mathbf{D}_N^{-1/2} \mathbf{D}_{\gamma/\rho}^{1/2} \mathbf{B}_0 (\tilde{\boldsymbol{\theta}}_0 - \boldsymbol{\theta}_0).$$

Summing the previous equality gives

$$\mathbf{M}_\infty^{(0)} \mathbf{D}_{N\gamma}^{-1/2} (\tilde{Y}_N^{(0)} - Y_N^{(0)}) = \mathbf{M}_0^{(0)} \mathbf{D}_{N\gamma}^{-1/2} (\tilde{Y}_0^{(0)} - Y_0^{(0)}) + \sum_{k=0}^{\infty} \mathbf{M}_{k+1}^{(0)} \mathbf{J}(k) \mathbf{D}_N^{-1/2} \mathbf{D}_{\gamma/\rho}^{1/2} \mathbf{B}_0 (\tilde{\boldsymbol{\theta}}_0 - \boldsymbol{\theta}_0).$$

Multiplying by  $[\mathbf{M}_\infty^{(0)}]^{-1}$  and using the fact that  $(\boldsymbol{\theta}_0, Y_0^{(0)}) = (\boldsymbol{\theta}, \mathbf{z})$ ,  $(\tilde{\boldsymbol{\theta}}_0, \tilde{Y}_0^{(0)}) = (\tilde{\boldsymbol{\theta}}, \tilde{\mathbf{z}})$ , we get

$$\mathbf{D}_{N\gamma}^{-1/2} (\tilde{Z}_1 - Z_1) = [\mathbf{M}_\infty^{(0)}]^{-1} \mathbf{D}_{N\gamma}^{-1/2} (\tilde{\mathbf{z}} - \mathbf{z}) + \sum_{k=0}^{\infty} [\mathbf{M}_\infty^{(0)}]^{-1} \mathbf{M}_{k+1}^{(0)} \mathbf{J}(k) \mathbf{D}_N^{-1/2} \mathbf{D}_{\gamma/\rho}^{1/2} \mathbf{B}_0 (\tilde{\boldsymbol{\theta}} - \boldsymbol{\theta}).$$

Plugging the result in (S52) implies for any  $n \geq 1$ ,

$$\begin{aligned} \|\tilde{Z}_n - Z_n\|_{\mathbf{D}_{N\gamma}^{-1}} &\leq (1 - \min_{i \in [b]} \{N_i \gamma_i m_i\} + r_{\gamma, \rho, N})^{n-1} \left[ \left\| [\mathbf{M}_\infty^{(0)}]^{-1} \right\| \|\tilde{\mathbf{z}} - \mathbf{z}\|_{\mathbf{D}_{N\gamma}^{-1}} \right. \\ &\quad \left. + \left\| \sum_{k=0}^{\infty} [\mathbf{M}_\infty^{(0)}]^{-1} \mathbf{M}_{k+1}^{(0)} \mathbf{J}(k) \mathbf{D}_N^{-1/2} \mathbf{D}_{\gamma/\rho}^{1/2} \mathbf{B}_0 \right\| \|\tilde{\boldsymbol{\theta}} - \boldsymbol{\theta}\| \right]. \quad (\text{S45}) \end{aligned}$$

By **H2-(ii)** and the definitions of  $\mathbf{C}_l^{(0)}, \mathbf{M}_k^{(0)}$  given in (S22), (S23), we have  $\|\mathbf{I}_{d_i} - \mathbf{C}_l^{(i,0)}\| \leq 1 - \gamma_i \tilde{m}_i$ . As a result and since  $([\mathbf{M}_\infty^{(0)}]^{-1} \mathbf{M}_k^{(0)})^i = \prod_{l=0}^{k-1} (\mathbf{I}_{d_i} - \mathbf{C}_l^{(i,0)})$ , the triangle inequality implies

$$\begin{aligned} \left\| \sum_{k=0}^{\infty} [\mathbf{M}_\infty^{(0)}]^{-1} \mathbf{M}_{k+1}^{(0)} \mathbf{J}(k) \mathbf{D}_N^{-1/2} \mathbf{D}_{\gamma/\rho}^{1/2} \mathbf{B}_0 \right\| &\leq \sum_{i \in [b]} \sqrt{\gamma_i / N_i} (\|\mathbf{A}_i\| / \rho_i) \sum_{k=1}^{N_i} \|([\mathbf{M}_\infty^{(0)}]^{-1} \mathbf{M}_k^{(0)})^i\| \\ &\leq \sum_{i \in [b]} \sqrt{\gamma_i / N_i} (\|\mathbf{A}_i\| / \rho_i) \sum_{k=0}^{N_i-1} (1 - \gamma_i \tilde{m}_i)^k \\ &\leq \sum_{i \in [b]} \|\mathbf{A}_i\| \sqrt{N_i \gamma_i / \rho_i} . \end{aligned}$$

Plugging this result in (S45), we get

$$\begin{aligned} \|\tilde{Z}_n - Z_n\|_{\mathbf{D}_{N\gamma}^{-1}} &\leq (1 - \min_{i \in [b]} \{N_i \gamma_i m_i\} + r_{\gamma, \rho, N})^{n-1} \left[ \|[\mathbf{M}_\infty^{(0)}]^{-1}\| \|\tilde{\mathbf{z}} - \mathbf{z}\|_{\mathbf{D}_{N\gamma}^{-1}} \right. \\ &\quad \left. + \left( \sum_{i \in [b]} \|\mathbf{A}_i\| \sqrt{N_i \gamma_i / \rho_i} \right) \|\tilde{\boldsymbol{\theta}} - \boldsymbol{\theta}\| \right] . \end{aligned}$$

Finally, Lemma S6 gives

$$\begin{aligned} \|\tilde{X}_n - X_n\|^2 &\leq (1 - \min_{i \in [b]} \{N_i \gamma_i m_i\} + r_{\gamma, \rho, N})^{2n-2} \cdot (1 + \|\bar{\mathbf{B}}_0^{-1} \mathbf{B}_0^\top \bar{\mathbf{D}}_0^{1/2}\|^2) \frac{\max_{i \in [b]} \{N_i \gamma_i\}}{\min_{i \in [b]} \{N_i \gamma_i\}} \\ &\quad \times \left[ \|[\mathbf{M}_\infty^{(0)}]^{-1}\| \|\tilde{\mathbf{z}} - \mathbf{z}\| + \left( \sum_{i \in [b]} \|\mathbf{A}_i\| / \rho_i \right) \|\tilde{\boldsymbol{\theta}} - \boldsymbol{\theta}\| \right]^2 . \end{aligned}$$

Plugging this result into (S24) concludes the proof.  $\square$

The following result gives a condition on  $\max_{i \in [b]} \{N_i \gamma_i\}$  to simplify the contracting term in Lemma S11 to  $1 - \min_{i \in [b]} \{N_i \gamma_i m_i\} / 2$ . To this end, define

$$\begin{aligned} A_0 &= \max_{i \in [b]} \{\tilde{M}_i\} \max_{i \in [b]} \{1/\rho_i\} / 2 + 4 \max_{i \in [b]} \{\tilde{M}_i\}^2 , \\ A_1 &= \max_{i \in [b]} \{\tilde{M}_i\}^2 \max_{i \in [b]} \{1/\rho_i\} . \end{aligned}$$

**Lemma S12.** Assume **H1-H2** and let  $c \in \mathbb{R}_+^*$ ,  $N \in (\mathbb{N}^*)^b$ ,  $\gamma \in (\mathbb{R}_+^*)^b$  such that

$$\begin{aligned} \min_{i \in [b]} \{N_i \gamma_i\} / \max_{i \in [b]} \{N_i \gamma_i\} &\geq c , \\ \max_{i \in [b]} \{N_i \gamma_i\} &\leq \frac{c \min_{i \in [b]} \{m_i\}}{2A_0 + \sqrt{2A_1 c \min_{i \in [b]} \{m_i\}}} \wedge \frac{2}{\max_{i \in [b]} \{m_i + M_i + 1/\rho_i\}} . \end{aligned} \tag{S46}$$

Then,  $1 - \min_{i \in [b]} \{N_i \gamma_i m_i\} + r_{\gamma, \rho, N} < 1 - \min_{i \in [b]} \{N_i \gamma_i m_i\} / 2 < 1$ , where  $r_{\gamma, \rho, N}$  is defined in (S33).

*Proof.* The proof is straightforward solving a second order polynomial inequality and using for any  $a, b \in \mathbb{R}_+^*$ ,  $a + \frac{b^2}{2a+b} \leq \sqrt{a^2 + b^2}$ .  $\square$

### S2.2.2. PROOF OF PROPOSITION 2

The next proposition quantifies the convergence of  $\delta_{\mathbf{x}} P_{\rho, \gamma, N}^n$  towards  $\Pi_{\rho, \gamma}$  in  $(\mathcal{P}_2(\mathbb{R}^d), W_2)$ , where  $\Pi_{\rho, \gamma}$  is the stationary distribution derived in Proposition S5. In addition, it generalises and gives a more formal statement than Proposition 2.

**Proposition S13.** Assume **H1-H2** and let  $c > 0$  and  $\gamma = \{\gamma_i\}_{i=1}^b$ ,  $\mathbf{N} \in (\mathbb{N}^*)^b$  such that (S46) is satisfied, for any  $i \in [b]$ ,  $N_i \gamma_i < 2 / \max_{i \in [b]} \{m_i + \tilde{M}_i\}$  and  $\gamma_i < \tilde{M}_i^{-1}$ . Then,  $P_{\rho, \gamma, \mathbf{N}}$  defined in (S17) admits a unique invariant probability measure  $\Pi_{\rho, \gamma, \mathbf{N}}$ . In addition, for any  $\mathbf{x} = (\mathbf{z}^\top, \boldsymbol{\theta}^\top)^\top$  with  $(\boldsymbol{\theta}, \mathbf{z}) \in \mathbb{R}^d \times \mathbb{R}^p$ , any integer  $n \geq 1$ , we have

$$W_2^2(\delta_{\mathbf{x}} P_{\rho, \gamma, \mathbf{N}}^n, \Pi_{\rho, \gamma, \mathbf{N}}) \leq (1 - \min_{i \in [b]} \{N_i \gamma_i m_i\} / 2)^{2n-2} \cdot (1 + \|\bar{\mathbf{B}}_0^{-1} \mathbf{B}_0^\top \tilde{\mathbf{D}}_0^{1/2}\|^2) \frac{\max_{i \in [b]} \{N_i \gamma_i\}}{\min_{i \in [b]} \{N_i \gamma_i\}} \\ \times \int_{\mathbb{R}^d \times \mathbb{R}^p} \left[ \|[\mathbf{M}_\infty^{(0)}]^{-1}\| \|\tilde{\mathbf{z}} - \mathbf{z}\| + \left( \sum_{i \in [b]} \|\mathbf{A}_i\| / \rho_i \right) \|\tilde{\boldsymbol{\theta}} - \boldsymbol{\theta}\| \right]^2 d\Pi_{\rho, \gamma, \mathbf{N}}(\tilde{\mathbf{x}}),$$

where  $\mathbf{B}_0, \bar{\mathbf{B}}_0, \mathbf{M}_\infty^{(0)}$  are defined in (S2), (S23), respectively.

Finally, if  $\mathbf{N} = N(1, \dots, 1) = N\mathbf{1}_b$  for  $N \geq 1$ , then  $\Pi_{\rho, \gamma, \mathbf{N}} = \Pi_{\rho, \gamma, \mathbf{1}_b}$ .

*Proof.* Note that under the conditions on  $\gamma$  and  $\mathbf{N}$  stated in Proposition S13, Lemma S12 ensures that  $1 - \min_{i \in [b]} \{N_i \gamma_i m_i\} / 2 < 1$ . Then, from Lemma S11 and Douc et al. (2018, Lemma 20.3.2, Theorem 20.3.4), we deduce the existence and unicity of a stationary distribution  $\Pi_{\rho, \gamma, \mathbf{N}}$  for  $P_{\rho, \gamma, \mathbf{N}}$ . The proof is concluded by using the upper bound given in Lemma S11.

We now show the last statement and assume that  $\mathbf{N} = N\mathbf{1}_b$ , for  $N \geq 1$ . By Proposition S5, we have the existence and unicity of a stationary distribution  $\Pi_{\rho, \gamma, \mathbf{1}_b}$  which is invariant for  $P_{\rho, \gamma}$  defined in (S7). For ease of notation, we simply denote  $\Pi_{\rho, \gamma, \mathbf{1}_b}$  by  $\Pi_{\rho, \gamma}$ . We now show that  $\Pi_{\rho, \gamma}$  is also invariant for  $P_{\rho, \gamma, \mathbf{N}}$  defined in (S17). Using the fact that  $P_{\rho, \gamma}$  defined in (S7) leaves  $\Pi_{\rho, \gamma}$  invariant from Proposition S5 and Fubini's theorem, we get for any  $A \in \mathcal{B}(\mathbb{R}^d)$  and  $B \in \mathcal{B}(\mathbb{R}^p)$ ,

$$\begin{aligned} \Pi_{\rho, \gamma} P_{\rho, \gamma, \mathbf{N}}(A \times B) &= \int_{A \times B} \int_{\mathbb{R}^d \times \mathbb{R}^p} \Pi_{\rho, \gamma}(d\tilde{\boldsymbol{\theta}}, d\tilde{\mathbf{z}}) P_{\rho, \gamma, \mathbf{N}}((\tilde{\boldsymbol{\theta}}, \tilde{\mathbf{z}}), (d\boldsymbol{\theta}, d\mathbf{z})) \\ &= \int_{A \times B} \int_{\mathbb{R}^d \times \mathbb{R}^p} \Pi_{\rho, \gamma}(d\tilde{\boldsymbol{\theta}}, d\tilde{\mathbf{z}}) Q_{\rho, \gamma, \mathbf{N}}(\tilde{\mathbf{z}}, d\mathbf{z} | \tilde{\boldsymbol{\theta}}) \Pi_{\rho}(d\boldsymbol{\theta} | \mathbf{z}) \\ &= \int_{A \times B} \int_{\mathbb{R}^d \times \mathbb{R}^p} \Pi_{\rho, \gamma}(d\tilde{\boldsymbol{\theta}}, d\tilde{\mathbf{z}}) \left[ \prod_{i=1}^b R_{\rho_i, \gamma_i}^{N_i}(\tilde{\mathbf{z}}_i, d\mathbf{z}_i | \tilde{\boldsymbol{\theta}}) \right] \Pi_{\rho}(d\boldsymbol{\theta} | \mathbf{z}) \\ &= \int_{A \times B} \int_{\mathbb{R}^d \times \mathbb{R}^p} \Pi_{\rho, \gamma}(d\tilde{\boldsymbol{\theta}}, d\tilde{\mathbf{z}}) \int_{\mathbb{R}^p} \left[ \prod_{i=1}^b R_{\rho_i, \gamma_i}(\tilde{\mathbf{z}}_i, d\tilde{\mathbf{z}}_i^{(1)} | \tilde{\boldsymbol{\theta}}) \right] \left[ \prod_{i=1}^b R_{\rho_i, \gamma_i}^{N_i-1}(\tilde{\mathbf{z}}_i^{(1)}, d\mathbf{z}_i | \tilde{\boldsymbol{\theta}}) \right] \Pi_{\rho}(d\boldsymbol{\theta} | \mathbf{z}) \\ &= \int_{A \times B} \int_{\mathbb{R}^d \times \mathbb{R}^p} \left[ \int_{\mathbb{R}^d \times \mathbb{R}^p} \Pi_{\rho, \gamma}(d\tilde{\boldsymbol{\theta}}, d\tilde{\mathbf{z}}) \left[ \prod_{i=1}^b R_{\rho_i, \gamma_i}(\tilde{\mathbf{z}}_i, d\tilde{\mathbf{z}}_i^{(1)} | \tilde{\boldsymbol{\theta}}) \right] \Pi_{\rho}(d\tilde{\boldsymbol{\theta}}^{(1)} | \tilde{\mathbf{z}}_i^{(1)}) \right] \\ &\quad \times \left[ \prod_{i=1}^b R_{\rho_i, \gamma_i}^{N_i-1}(\tilde{\mathbf{z}}_i^{(1)}, d\mathbf{z}_i | \tilde{\boldsymbol{\theta}}) \right] \Pi_{\rho}(d\boldsymbol{\theta} | \mathbf{z}) \\ &= \int_{A \times B} \int_{\mathbb{R}^d \times \mathbb{R}^p} \Pi_{\rho, \gamma}(d\tilde{\boldsymbol{\theta}}^{(1)}, d\tilde{\mathbf{z}}^{(1)}) \left[ \prod_{i=1}^b R_{\rho_i, \gamma_i}^{N_i-1}(\tilde{\mathbf{z}}_i^{(1)}, d\mathbf{z}_i | \tilde{\boldsymbol{\theta}}^{(1)}) \right] \Pi_{\rho}(d\boldsymbol{\theta} | \mathbf{z}). \end{aligned} \tag{S47}$$

Using a straightforward induction, we finally get

$$\int_{A \times B} \int_{\mathbb{R}^d \times \mathbb{R}^p} \Pi_{\rho, \gamma}(d\tilde{\boldsymbol{\theta}}, d\tilde{\mathbf{z}}) P_{\rho, \gamma, \mathbf{N}}((\tilde{\boldsymbol{\theta}}, \tilde{\mathbf{z}}), (d\boldsymbol{\theta}, d\mathbf{z})) = \int_{A \times B} \Pi_{\rho, \gamma}(d\boldsymbol{\theta}, d\mathbf{z}),$$

which shows that  $P_{\rho, \gamma, \mathbf{N}}$  leaves  $\Pi_{\rho, \gamma}$  invariant. Since this stationary distribution is unique, we conclude that  $\Pi_{\rho, \gamma, \mathbf{N}} = \Pi_{\rho, \gamma}$ .  $\square$

We specify our result to the case where we take a specific initial distribution. To define it, consider

$$\mathbf{x}^* = ([\boldsymbol{\theta}^*]^\top, [\mathbf{z}^*]^\top)^\top, \text{ where } \boldsymbol{\theta}^* = \arg \min \{-\log \pi\} \text{ and } \mathbf{z}^* = ([\mathbf{A}_1 \boldsymbol{\theta}^*]^\top, \dots, [\mathbf{A}_b \boldsymbol{\theta}^*]^\top)^\top. \quad (\text{S48})$$

We define the probability measure

$$\mu_{\rho}^* = \delta_{\mathbf{z}^*} \otimes \Pi_{\rho}(\cdot | \mathbf{z}^*). \quad (\text{S49})$$

Note that sampling from  $\mu_{\rho}^*$  is straightforward and simply consists in setting  $\mathbf{z}_0 = \mathbf{z}^*$  and  $\boldsymbol{\theta}_0 = \bar{\mathbf{B}}_0^{-1} \mathbf{B}_0^\top \tilde{\mathbf{D}}_0^{1/2} \mathbf{z}_0 + \bar{\mathbf{B}}_0^{-1/2} \xi$ , where  $\xi$  is a  $d$ -dimensional standard Gaussian random variable. We now specify our result when using  $\mu_{\rho}^*$  as an initial distribution. Define the  $\mathbf{z}$ -marginal under  $\Pi_{\rho, \gamma}$  by

$$\pi_{\rho, \gamma}^{\mathbf{z}} = \int_{\mathbb{R}^d} \Pi_{\rho, \gamma}(\mathrm{d}\boldsymbol{\theta}, \mathbf{z}), \quad (\text{S50})$$

and the transition kernel of the Markov chain  $\{Z_n\}_{n \geq 0}$ , for all  $\mathbf{z} \in \mathbb{R}^p$  and  $\mathbf{B} \in \mathcal{B}(\mathbb{R}^p)$ , by

$$P_{\rho, \gamma, \mathbf{N}}^{\mathbf{z}}(\mathbf{z}, \mathbf{B}) = \int_{\mathbb{R}^d} Q_{\rho, \gamma, \mathbf{N}}(\mathbf{z}, \mathbf{B} | \boldsymbol{\theta}) \Pi_{\rho}(\mathrm{d}\boldsymbol{\theta} | \mathbf{z}), \quad (\text{S51})$$

where  $\Pi_{\rho}(\cdot)$  and  $Q_{\rho, \gamma, \mathbf{N}}$  are defined in (5) and (S16), respectively.

**Proposition S14.** Assume **H1-H2** and let  $c > 0$  and  $\gamma = \{\gamma_i\}_{i=1}^b$ ,  $\mathbf{N} \in (\mathbb{N}^*)^b$  such that (S46) is satisfied, for any  $i \in [b]$ ,  $N_i \gamma_i < 2 / \max_{i \in [b]} \{m_i + \tilde{M}_i\}$  and  $\gamma_i < \tilde{M}_i^{-1}$ . Then, for any integer  $n \geq 1$ , we have

$$\begin{aligned} W_2(\mu_{\rho}^* P_{\rho, \gamma, \mathbf{N}}^n, \Pi_{\rho, \gamma, \mathbf{N}}) &\leq 2^{1/2} (1 - \min_{i \in [b]} \{N_i \gamma_i m_i\} / 2)^{n-1} \cdot (1 + \|\bar{\mathbf{B}}_0^{-1} \mathbf{B}_0^\top \tilde{\mathbf{D}}_0^{1/2}\|^2)^{1/2} \max_{i \in [b]} \{N_i \gamma_i\}^{1/2} \\ &\quad \times \left\{ \int_{\mathbb{R}^d} \|\mathbf{z}_1 - \mathbf{z}^*\|_{\mathbf{D}_{\mathbf{N}\gamma}^{-1}}^2 \pi_{\rho, \gamma}^{\mathbf{z}}(\mathrm{d}\mathbf{z}_1) + \int_{\mathbb{R}^d} \|\mathbf{z}_1 - \mathbf{z}^*\|_{\mathbf{D}_{\mathbf{N}\gamma}^{-1}}^2 P_{\rho, \gamma, \mathbf{N}}^{\mathbf{z}}(\mathbf{z}^*, \mathrm{d}\mathbf{z}_1) \right\}^{1/2}, \end{aligned}$$

where  $\bar{\mathbf{B}}_0, \mathbf{B}_0, \tilde{\mathbf{D}}_0$  are defined in (S2)-(S3).

*Proof.* Consider for  $n \in \mathbb{N}^*$ ,  $X_n = (\theta_n^\top, Z_n^\top)^\top$ ,  $\tilde{X}_n = (\tilde{\theta}_n^\top, \tilde{Z}_n^\top)^\top$  defined in (S18) with  $X_0$  distributed according to  $\mu_{\rho}^*$  and  $\tilde{X}_0$  distributed according to  $\Pi_{\rho, \gamma}$ . Combining Lemma S7, Lemma S10 and Lemma S12, we have for  $n \geq 1$ ,

$$\|\tilde{Z}_{n+1} - Z_{n+1}\|_{\mathbf{D}_{\mathbf{N}\gamma}^{-1}} \leq (1 - \min_{i \in [b]} \{N_i \gamma_i m_i\} / 2) \|\tilde{Z}_n - Z_n\|_{\mathbf{D}_{\mathbf{N}\gamma}^{-1}}.$$

Thereby, for any  $n \geq 1$ , we obtain by induction

$$\|\tilde{Z}_n - Z_n\|_{\mathbf{D}_{\mathbf{N}\gamma}^{-1}} \leq (1 - \min_{i \in [b]} \{N_i \gamma_i m_i\} / 2)^{n-1} \|\tilde{Z}_1 - Z_1\|_{\mathbf{D}_{\mathbf{N}\gamma}^{-1}}. \quad (\text{S52})$$

Using  $\|\tilde{Z}_1 - Z_1\|_{\mathbf{D}_{\mathbf{N}\gamma}^{-1}}^2 \leq 2\|\tilde{Z}_1 - \mathbf{z}^*\|_{\mathbf{D}_{\mathbf{N}\gamma}^{-1/2}}^2 + 2\|Z_1 - \mathbf{z}^*\|_{\mathbf{D}_{\mathbf{N}\gamma}^{-1/2}}^2$  combined with the definition of the Wasserstein distance and Lemma S6 give

$$\begin{aligned} W_2(\mu_{\rho}^* P_{\rho, \gamma, \mathbf{N}}^n, \Pi_{\rho, \gamma, \mathbf{N}}) &\leq \mathbb{E} \left[ \|\tilde{X}_n - X_n\|^2 \right]^{1/2} \\ &\leq (1 + \|\bar{\mathbf{B}}_0^{-1} \mathbf{B}_0^\top \tilde{\mathbf{D}}_0^{1/2}\|^2)^{1/2} \max_{i \in [b]} \{N_i \gamma_i\}^{1/2} \mathbb{E} \left[ \|\tilde{Z}_n - Z_n\|_{\mathbf{D}_{\mathbf{N}\gamma}^{-1/2}}^2 \right]^{1/2} \\ &\leq 2^{1/2} (1 - \min_{i \in [b]} \{N_i \gamma_i m_i\} / 2)^{n-1} (1 + \|\bar{\mathbf{B}}_0^{-1} \mathbf{B}_0^\top \tilde{\mathbf{D}}_0^{1/2}\|^2)^{1/2} \max_{i \in [b]} \{N_i \gamma_i\}^{1/2} \\ &\quad \times \mathbb{E} \left[ \|\tilde{Z}_1 - \mathbf{z}^*\|_{\mathbf{D}_{\mathbf{N}\gamma}^{-1/2}}^2 + \|Z_1 - \mathbf{z}^*\|_{\mathbf{D}_{\mathbf{N}\gamma}^{-1/2}}^2 \right]^{1/2}. \end{aligned} \quad (\text{S53})$$

Since  $\tilde{X}_0$  is distributed according to the stationnary distribution  $\Pi_{\rho, \gamma, \mathbf{N}}$ ,  $\tilde{X}_1$  also and therefore  $\tilde{Z}_1$  is distributed according to  $\pi_{\rho, \gamma}^{\mathbf{z}}$ . Finally, by definition  $Z_1$  has distribution  $P_{\rho, \gamma, \mathbf{N}}^{\mathbf{z}}(\mathbf{z}^*, \cdot)$ , therefore (S53) completes the proof.  $\square$

### S3. Proof of Proposition 3

The proof of Proposition 3 stands for a generalization of Vono et al. (2019, Proposition 6) which only considered the specific case  $\rho_i = \rho^2$  for  $i \in [b]$ . This section is divided into two parts, the first gathers lemmas which allow us to upper bound the  $\xi^2$ -divergence between  $\pi_\rho$  and  $\pi$ . Then, in the second subsection, we combine these results to control the Wasserstein distance  $W_2(\pi_\rho, \pi)$  by showing that it is smaller than  $\chi^2(\pi_\rho|\pi)$ . For any  $\theta \in \mathbb{R}^d$  and  $\rho \in (\mathbb{R}_+^*)^b$ , define

$$U_i^{\rho_i}(\mathbf{A}_i\theta) = -\log \left( \int_{\mathbf{z}_i \in \mathbb{R}^d} \exp\{-U_i(\mathbf{z}_i) - \|\mathbf{z}_i - \mathbf{A}_i\theta\|^2/(2\rho_i)\} d\mathbf{z}_i / (2\pi\rho_i)^{d_i/2} \right), \quad (\text{S54})$$

$$\bar{B}(\theta) = \sum_{i=1}^b \rho_i \|\nabla U_i(\mathbf{A}_i\theta)\|^2 / 2, \quad (\text{S55})$$

$$\underline{B}(\theta) = \sum_{i=1}^b \left\{ \rho_i \|\nabla U_i(\mathbf{A}_i\theta)\|^2 / [2(1 + \rho_i M_i)] - d_i \log(1 + \rho_i M_i) / 2 \right\} \quad (\text{S56})$$

and consider

$$U(\theta) = \sum_{i \in [b]} U_i(\mathbf{A}_i\theta), \quad U^\rho(\theta) = \sum_{i \in [b]} U_i^{\rho_i}(\mathbf{A}_i\theta).$$

#### S3.1. Technical lemmata

We start this subsection by Lemma S15 which allow us to bound the ratio between the integrals defined by  $\int_{\mathbb{R}^d} \exp\{-\sum_{i \in [b]} U_i^{\rho_i}(\mathbf{A}_i\theta)\}$  and  $\int_{\mathbb{R}^d} \exp\{-\sum_{i \in [b]} U_i(\mathbf{A}_i\theta)\} d\theta$ .

**Lemma S15.** Assume H1-H2-(i) and let  $\rho \in (\mathbb{R}_+^*)^b$ . Then, we have  $\underline{B}(\theta) \leq U(\theta) - U^\rho(\theta)$ , for any  $\theta \in \mathbb{R}^d$ . If we assume in addition that for any  $i \in [b]$ ,  $U_i$  is convex, we have  $U(\theta) - U^\rho(\theta) \leq \bar{B}(\theta)$ , for any  $\theta \in \mathbb{R}^d$ .

*Proof.* The proof follows from the same lines as in Vono et al. (2019, Lemma 14). In what follows, we give it for the sake of completeness. First, note for any  $\theta \in \mathbb{R}^d$  and  $i \in [b]$ ,

$$\exp\{U_i(\mathbf{A}_i\theta) - U_i^{\rho_i}(\mathbf{A}_i\theta)\} = \int_{\mathbb{R}^{d_i}} \exp\left(U_i(\mathbf{A}_i\theta) - U_i(\mathbf{z}_i) - \|\mathbf{z}_i - \mathbf{A}_i\theta\|^2/(2\rho_i)\right) \frac{d\mathbf{z}_i}{(2\pi\rho_i)^{d_i/2}}. \quad (\text{S57})$$

Using H2-(i), and a second order Taylor expansion, for any  $\theta \in \mathbb{R}^d$ ,  $i \in [b]$ ,  $\mathbf{z}_i \in \mathbb{R}^{d_i}$ , we have

$$U_i(\mathbf{A}_i\theta) - U_i(\mathbf{z}_i) \geq \nabla U_i(\mathbf{A}_i\theta)^\top (\mathbf{A}_i\theta - \mathbf{z}_i) - M_i \|\mathbf{A}_i\theta - \mathbf{z}_i\|^2 / 2.$$

Hence, using (S57), we have for any  $\theta \in \mathbb{R}^d$  and  $i \in [b]$ ,

$$\begin{aligned} \exp\left(\sum_{i=1}^b U_i(\mathbf{A}_i\theta) - U_i^{\rho_i}(\mathbf{A}_i\theta)\right) &\geq \prod_{i=1}^b \exp\left(\frac{\rho_i}{2(1 + \rho_i M_i)} \|\nabla U_i(\mathbf{A}_i\theta)\|^2\right) (1 + \rho_i M_i)^{-d_i/2} \\ &= \exp(\underline{B}(\theta)). \end{aligned}$$

Similarly, under the assumption that for any  $i \in [b]$ ,  $U_i$  is convex, the proof for the upper bound follows from the same lines using, for any  $i \in [b]$ ,  $\theta \in \mathbb{R}^d$  and  $\mathbf{z}_i \in \mathbb{R}^{d_i}$ , that

$$U_i(\mathbf{A}_i\theta) - U_i(\mathbf{z}_i) \leq \nabla U_i(\mathbf{A}_i\theta)^\top (\mathbf{A}_i\theta - \mathbf{z}_i).$$

□

**Lemma S16.** Assume H1-H2. Then,  $U$  is  $m_U$ -strongly convex with  $m_U = \lambda_{\min}(\sum_{i=1}^b m_i \mathbf{A}_i^\top \mathbf{A}_i)$ .

*Proof.* Using by H2-(i) that for any  $i \in [b]$ ,  $U_i$  is twice differentiable and by H2-(ii) the fact that for any  $i \in [b]$ ,  $U_i$  is  $m_i$ -strongly convex, we have for any  $\theta \in \mathbb{R}^d$

$$\nabla^2 U(\theta) = \sum_{i=1}^b \mathbf{A}_i^\top \nabla^2 U_i(\mathbf{A}_i\theta) \mathbf{A}_i \succeq \sum_{i=1}^b m_i \mathbf{A}_i^\top \mathbf{A}_i \succeq \lambda_{\min}\left(\sum_{i=1}^b m_i \mathbf{A}_i^\top \mathbf{A}_i\right) \mathbf{I}_d = m_U \mathbf{I}_d.$$

□



For any  $\boldsymbol{\theta} \in \mathbb{R}^d$ , define

$$\beta(\boldsymbol{\theta}) = \left( \sum_{i=1}^b \rho_i \left\| \nabla U_i(\mathbf{A}_i \boldsymbol{\theta}) \right\|^2 \right)^{1/2}. \quad (\text{S58})$$

**Lemma S17.** Assume **H2-(i)** and let  $\boldsymbol{\rho} \in (\mathbb{R}_+^*)^b$ . Then  $\beta$  is a Lipschitz function w.r.t.  $\|\cdot\|$ , with Lipschitz constant

$$L_\beta = \lambda_{\max} \left( \sum_{i=1}^b \rho_i M_i^2 \mathbf{A}_i^\top \mathbf{A}_i \right)^{1/2}. \quad (\text{S59})$$

*Proof.* For any  $\boldsymbol{\theta}_1, \boldsymbol{\theta}_2 \in \mathbb{R}^d$ , we have using  $|(\sum_{i=1}^b a_i^2)^{1/2} - (\sum_{i=1}^b b_i^2)^{1/2}| \leq (\sum_{i=1}^b (a_i - b_i)^2)^{1/2}$ , that

$$|\beta(\boldsymbol{\theta}_1) - \beta(\boldsymbol{\theta}_2)| \leq \left( \sum_{i=1}^b \rho_i \left\| \nabla U_i(\mathbf{A}_i \boldsymbol{\theta}_1) - \nabla U_i(\mathbf{A}_i \boldsymbol{\theta}_2) \right\|^2 \right)^{1/2} \leq \left( \sum_{i=1}^b \rho_i M_i^2 \left\| \mathbf{A}_i (\boldsymbol{\theta}_1 - \boldsymbol{\theta}_2) \right\|^2 \right)^{1/2},$$

which completes the proof.  $\square$

Suppose **H2-(ii)** and for any  $i \in [b]$ , denote  $\boldsymbol{\theta}_i^*$  a minimiser of  $\boldsymbol{\theta} \mapsto U_i(\mathbf{A}_i \boldsymbol{\theta})$ .

**Lemma S18.** Assume **H1-H2** and let  $\boldsymbol{\rho} \in (\mathbb{R}_+^*)^b$ . Then for any  $s < m_U / (12L_\beta^2)$ , where  $L_\beta$  is defined in (S59), we have

$$\log \pi \left[ e^{s\{\beta^2 - \pi[\beta^2]\}} \right] \leq 8s^2 L_\beta^4 / m_U^2 + 4s^2 \{\pi[\beta]\}^2 L_\beta^2 / m_U. \quad (\text{S60})$$

In addition,

$$\pi(\beta^2) \leq 2dL_\beta^2 / m_U + 2 \sum_{i=1}^b \rho_i M_i^2 \left\| \mathbf{A}_i (\boldsymbol{\theta}^* - \boldsymbol{\theta}_i^*) \right\|^2. \quad (\text{S61})$$

*Proof.* Using the decomposition

$$\beta^2(\boldsymbol{\theta}) - \{\pi[\beta]\}^2 = (\beta(\boldsymbol{\theta}) - \pi[\beta])^2 + 2\pi[\beta](\beta(\boldsymbol{\theta}) - \pi[\beta])$$

and the Cauchy-Schwarz inequality imply, for any  $s > 0$ ,

$$\pi \left[ e^{s\{\beta^2 - \{\pi[\beta]\}^2\}} \right] \leq \left\{ \pi \left[ e^{2s\{\beta - \pi[\beta]\}^2} \right] \right\}^{1/2} \cdot \left\{ \pi \left[ e^{4s\pi[\beta]\{\beta - \pi[\beta]\}} \right] \right\}^{1/2}. \quad (\text{S62})$$

The proof consists in bounding the two terms in the right-hand sided. Since  $\beta : \mathbb{R}^d \rightarrow \mathbb{R}$  is  $L_\beta$ -Lipschitz by Lemma S17, for any  $0 \leq s \leq m_U / (12L_\beta^2)$ , using Vono et al. (2019, Lemma 16) and Lemma S16 gives setting  $\bar{\beta} = \beta - \pi[\beta]$ , that

$$\pi \left[ \exp\{2s(\bar{\beta}^2 - \pi[\bar{\beta}^2])\} \right] \leq \exp(16s^2 L_\beta^4 / m_U^2). \quad (\text{S63})$$

In addition, using Bakry et al. (2013, Proposition 5.4.1), Lemma S17 and Lemma S16, we get for any  $s \geq 0$ ,

$$\pi \left[ e^{4s\pi[\beta](\beta - \pi[\beta])} \right] \leq e^{8s^2 \{\pi[\beta]\}^2 L_\beta^2 / m_U}.$$

Plugging this result and (S63) into (S62), we get

$$\pi \left[ e^{s\{\beta^2 - \{\pi[\beta]\}^2\}} \right] \leq \exp(s\pi(\bar{\beta}^2) + 8s^2 L_\beta^4 / m_U^2 + 4s^2 \{\pi[\beta]\}^2 L_\beta^2 / m_U).$$

The proof of (S60) follows using  $\pi(\bar{\beta}^2) = \pi(\beta^2) - [\pi(\beta)]^2$  and rearranging terms.

Using the Young inequality, **H2-(i)**,  $\nabla U_i(\mathbf{A}_i \boldsymbol{\theta}_i^*) = 0$ ,  $\nabla U(\boldsymbol{\theta}^*) = 0$ , we have

$$\begin{aligned}
 \pi(\beta^2) &= \int_{\mathbb{R}^d} \left( \sum_{i=1}^b \rho_i \|\nabla U_i(\mathbf{A}_i \boldsymbol{\theta})\|^2 \right) \pi(\boldsymbol{\theta}) d\boldsymbol{\theta} \\
 &\leq 2 \int_{\mathbb{R}^d} \left( \sum_{i=1}^b \rho_i M_i^2 \|\mathbf{A}_i(\boldsymbol{\theta} - \boldsymbol{\theta}^*)\|^2 \right) \pi(\boldsymbol{\theta}) d\boldsymbol{\theta} + 2 \sum_{i=1}^b \rho_i M_i^2 \|\mathbf{A}_i(\boldsymbol{\theta}^* - \boldsymbol{\theta}_i^*)\|^2 \\
 &\leq 2\lambda_{\max} \left( \sum_{i=1}^b \rho_i M_i^2 \mathbf{A}_i^\top \mathbf{A}_i \right) \int_{\mathbb{R}^d} \|\boldsymbol{\theta} - \boldsymbol{\theta}^*\|^2 \pi(\boldsymbol{\theta}) d\boldsymbol{\theta} + 2 \sum_{i=1}^b \rho_i M_i^2 \|\mathbf{A}_i(\boldsymbol{\theta}^* - \boldsymbol{\theta}_i^*)\|^2 \\
 &\leq 2dL_\beta^2/m_U + 2 \sum_{i=1}^b \rho_i M_i^2 \|\mathbf{A}_i(\boldsymbol{\theta}^* - \boldsymbol{\theta}_i^*)\|^2,
 \end{aligned}$$

where we have used  $\pi[\|\boldsymbol{\theta} - \boldsymbol{\theta}^*\|^2] \leq d/m_U$  by [Durmus & Moulines \(2019, Proposition 1 \(ii\)\)](#) and [Lemma S16](#).  $\square$

[Proposition 1](#) shows that  $\pi_\rho(\cdot) = \int_{\mathbb{R}^p} \Pi_\rho(\cdot, \mathbf{z}) d\mathbf{z}$  is well-defined and as such admits a finite normalising constant. These two quantities are defined by

$$Z_{\pi_\rho} = \int_{\mathbb{R}^d} \exp \left\{ - \sum_{i \in [b]} U_i^{\rho_i}(\mathbf{A}_i \boldsymbol{\theta}) \right\} d\boldsymbol{\theta}, \quad \pi_\rho(\cdot) = \exp \left\{ - \sum_{i \in [b]} U_i^{\rho_i}(\mathbf{A}_i \cdot) \right\} / Z_{\pi_\rho}. \quad (\text{S64})$$

Finally, note that the following quantity  $Z_\pi$  is a normalising constant of  $\pi$  associated with the potential  $U$ , i.e.  $\pi = e^{-U}/Z_\pi$ ,

$$Z_\pi = \int_{\mathbb{R}^d} \exp \left\{ - \sum_{i \in [b]} U_i(\mathbf{A}_i \boldsymbol{\theta}) \right\} d\boldsymbol{\theta}. \quad (\text{S65})$$

**Lemma S19.** Assume **H1-H2** and let  $\boldsymbol{\rho} \in (\mathbb{R}_+^*)^b$ . Suppose in addition that  $6L_\beta^2 \leq m_U$  where  $L_\beta$  is given in [\(S59\)](#). Then, we have

$$\log(Z_{\pi_\rho}/Z_\pi) \leq \left\{ dL_\beta^2/m_U + \sum_{i=1}^b \rho_i M_i^2 \|\mathbf{A}_i(\boldsymbol{\theta}^* - \boldsymbol{\theta}_i^*)\|^2 \right\} (1 + 2L_\beta^2/m_U) + 2L_\beta^4/m_U^2.$$

*Proof.* From the definitions [\(S64\)](#) and [\(S65\)](#), we have  $Z_{\pi_\rho}/Z_\pi = \int_{\mathbb{R}^d} \pi(\boldsymbol{\theta}) \exp\{\sum_{i=1}^b U_i(\mathbf{A}_i \boldsymbol{\theta}) - U_i^{\rho_i}(\mathbf{A}_i \boldsymbol{\theta})\} d\boldsymbol{\theta}$ . By [Lemma S15](#), we obtain

$$Z_{\pi_\rho}/Z_\pi \leq \int_{\mathbb{R}^d} \pi(\boldsymbol{\theta}) \exp(\bar{B}(\boldsymbol{\theta})) d\boldsymbol{\theta}.$$

Note that  $\bar{B} = \beta^2/2$  by [\(S55\)-\(S58\)](#), hence using that  $6L_\beta^2 \leq m_U$ , [Lemma S18](#) applied with  $s = 1/2$  shows that

$$\log \left( \int_{\mathbb{R}^d} \pi(\boldsymbol{\theta}) \exp(\bar{B}(\boldsymbol{\theta})) d\boldsymbol{\theta} \right) \leq \pi[\beta^2]/2 + 2L_\beta^4/m_U^2 + \{\pi[\beta]\}^2 L_\beta^2/m_U.$$

Using [Lemma S18-\(S61\)](#) and  $\pi[\beta] \leq \pi[\beta^2]$  concludes the proof.  $\square$

### S3.2. Proof of Proposition 3

Based on the technical lemmas derived in [Section S3.1](#), we are now ready to bound the Wasserstein distance of order 2 between  $\pi$  and  $\pi_\rho$ .

*Proof of Proposition Proposition 3.* Let  $\boldsymbol{\rho} \in (\mathbb{R}_+^*)^b$  such that  $\max_{i \in [b]} \rho_i = \bar{\rho} \leq \sigma_U^2/12$ , where  $\sigma_U^2 = \|\mathbf{A}^\top \mathbf{A}\| \max_{i \in [b]} \{M_i^2\}/m_U$ . Then, by definition of  $L_\beta$  [\(S59\)](#), we get

$$12L_\beta^2 \leq m_U. \quad (\text{S66})$$

and Lemma S18 can be applied for  $s = 1$  and Lemma S19 too. By Lemma S16,  $U = -\log \pi$  is  $m_U$ -strongly convex therefore  $\pi$  satisfies a log-Sobolev inequality with constant  $m_U$  (Ledoux, 2001, Theorem 5.2). Finally, Otto & Villani (2000, Theorem 1) shows that  $\pi$  satisfies for any  $\nu \in \mathcal{P}_2(\mathbb{R}^d)$ :

$$W_2(\nu, \pi) \leq \sqrt{(2/m_U)\text{KL}(\nu|\pi)} \leq \sqrt{(2/m_U)\chi^2(\pi_\rho|\pi)}, \quad (\text{S67})$$

where  $\chi^2$  is the chi-square divergence and where we have used for the last inequality that  $\text{KL}(\pi_\rho|\pi) \leq \chi^2(\pi_\rho|\pi)$  since for any  $t > 0$ ,  $\log(t) \leq t - 1$ . We now bound  $\chi^2(\pi_\rho|\pi)$ . By (S64) and (S65), for any  $\theta \in \mathbb{R}^d$ , consider the decomposition given by

$$\pi_\rho(\theta)/\pi(\theta) - 1 = (Z_\pi/Z_{\pi_\rho}) \exp\left(\sum_{i=1}^b (U_i(\mathbf{A}_i\theta) - U_i^{\rho_i}(\mathbf{A}_i\theta))\right) - 1. \quad (\text{S68})$$

In the sequel, we will both lower and upper bound (S68) in order to upper bound  $|1 - \pi_\rho(\theta)/\pi(\theta)|$ . Using the fact that for all  $x \in \mathbb{R}$ ,  $\exp(x) - 1 \geq x$ , Lemmas S15 and S19 yield

$$\begin{aligned} \pi_\rho(\theta)/\pi(\theta) - 1 &\geq \log(Z_\pi/Z_{\pi_\rho}) + \sum_{i=1}^b (U_i(\mathbf{A}_i\theta) - U_i^{\rho_i}(\mathbf{A}_i\theta)) \\ &\geq -\left\{dL_\beta^2/m_U + \sum_{i=1}^b \rho_i M_i^2 \|\mathbf{A}_i(\theta^\star - \theta_i^\star)\|^2\right\} (1 + 2L_\beta^2/m_U) - 2L_\beta^4/m_U^2 + \underline{B}(\theta) \geq -A_1, \end{aligned} \quad (\text{S69})$$

where

$$\begin{aligned} A_1 &= \left\{dL_\beta^2/m_U + \sum_{i=1}^b \rho_i M_i^2 \|\mathbf{A}_i(\theta^\star - \theta_i^\star)\|^2\right\} (1 + 2L_\beta^2/m_U) \\ &\quad + 2L_\beta^4/m_U^2 + \sum_{i=1}^b (d_i/2) \log(1 + \rho_i M_i), \end{aligned}$$

where we have used in the last inequality that  $\underline{B}(\theta) \geq -\sum_{i=1}^b (d_i/2) \log(1 + \rho_i M_i)$  by (S55). In addition, by (S64) and (S65)  $Z_{\pi_\rho}/Z_\pi = \int_{\mathbb{R}^d} \pi(\theta) \exp\{\sum_{i=1}^b U_i(\mathbf{A}_i\theta) - U_i^{\rho_i}(\mathbf{A}_i\theta)\} d\theta$ , which implies by Lemma S15 and Jensen inequality

$$Z_{\pi_\rho}/Z_\pi \geq \int_{\mathbb{R}^d} \pi(\theta) \exp(\underline{B}(\theta)) d\theta \geq \exp(\pi[\underline{B}]).$$

It follows by (S68) that  $\pi_\rho(\theta)/\pi(\theta) - 1 \leq \exp(\overline{B}(\theta) - \pi(\underline{B})) - 1$ . Combining this result and (S69), it follows that the Pearson  $\chi^2$ -divergence between  $\pi$  and  $\pi_\rho$  can be upper bounded as where

$$\chi^2(\pi_\rho|\pi) \leq \max(A_1^2, A_2), \quad A_2 = \int_{\mathbb{R}^d} (\exp(\overline{B}(\theta) - \pi(\underline{B})) - 1)^2 \pi(\theta) d\theta.$$

We now provide an explicit bound for  $A_2$ . First by Jensen inequality, we have  $\pi(\exp(\overline{B})) \geq \exp(\pi(\overline{B}))$  which implies that  $\exp(-\pi(\underline{B}))\pi[\exp(\overline{B})] \geq \prod_{i=1}^b (1 + \rho_i M_i)^{d_i/2}$  by (S55). Therefore, using that  $\overline{B} = \beta^2/2$  by (S55)-(S58) and

Lemma S18 with  $s = 1$  since (S66) holds, we get by (S55),

$$\begin{aligned}
 A_2 &= \int_{\mathbb{R}^d} (\exp(\bar{B}(\boldsymbol{\theta}) - \pi(\underline{B})) - 1)^2 \pi(\boldsymbol{\theta}) d\boldsymbol{\theta} \\
 &= \exp(-2\pi(\underline{B})) \pi[\exp(2\bar{B})] - 2 \exp(-\pi(\underline{B})) \pi[\exp(\bar{B})] + 1 \\
 &\leq \prod_{i=1}^b (1 + \rho_i M_i)^{d_i} \cdot \exp(-\pi\{\sum_{i=1}^b (\rho_i/(1 + \rho_i M_i)) \|\nabla U_i(\mathbf{A}_i \cdot)\|^2\}) \pi[\exp(\beta^2)] \\
 &\quad - 2 \prod_{i=1}^b (1 + \rho_i M_i)^{d_i/2} + 1 \\
 &\leq \prod_{i=1}^b (1 + \rho_i M_i)^{d_i} \cdot \exp(\pi\{\sum_{i=1}^b (\rho_i^2 M_i/(1 + \rho_i M_i)) \|\nabla U_i(\mathbf{A}_i \cdot)\|^2\}) \\
 &\quad \times \exp\left(8L_\beta^4/m_U^2 + 4\{2dL_\beta^2/m_U + 2\sum_{i=1}^b \rho_i M_i^2 \|\mathbf{A}_i(\boldsymbol{\theta}^* - \boldsymbol{\theta}_i^*)\|^2\} L_\beta^2/m_U\right) \tag{S70}
 \end{aligned}$$

$$- 2 \prod_{i=1}^b (1 + \rho_i M_i)^{d_i/2} + 1, \tag{S71}$$

where we have used for the last inequality that for  $\boldsymbol{\theta} \in \mathbb{R}^d$ ,  $\beta(\boldsymbol{\theta})^2 - \sum_{i=1}^b (\rho_i/(1 + \rho_i M_i)) \|\nabla U_i(\mathbf{A}_i \boldsymbol{\theta})\|^2 = \sum_{i=1}^b (\rho_i^2 M_i/(1 + \rho_i M_i)) \|\nabla U_i(\mathbf{A}_i \boldsymbol{\theta})\|^2$ ,  $\pi[\beta^2] \leq \pi[\beta^2]$  by the Cauchy-Schwartz inequality and Lemma S18-(S61). Similarly to the proof of Lemma S18-(S61), by H2-(i),  $\nabla U_i(\mathbf{A}_i \boldsymbol{\theta}_i^*) = 0$ ,  $\nabla U(\boldsymbol{\theta}^*) = 0$ , Durmus & Moulines (2019, Proposition 1 (ii)) and Lemma S16, we have

$$\begin{aligned}
 \pi\left[\sum_{i=1}^b (\rho_i^2 M_i/(1 + \rho_i M_i)) \|\nabla U_i(\mathbf{A}_i \cdot)\|^2\right] &\leq \pi\left[\sum_{i=1}^b \rho_i^2 M_i \|\nabla U_i(\mathbf{A}_i \cdot)\|^2\right] \\
 &\leq 2d\lambda_{\max}\left(\sum_{i=1}^b \rho_i^2 M_i^3 \mathbf{A}_i^\top \mathbf{A}_i\right)/m_U + 2\sum_{i=1}^b \rho_i^2 M_i^3 \|\mathbf{A}_i(\boldsymbol{\theta}^* - \boldsymbol{\theta}_i^*)\|^2.
 \end{aligned}$$

Therefore, we get by (S71)

$$\begin{aligned}
 A_2 \leq A_3 &= \prod_{i=1}^b (1 + \rho_i M_i)^{d_i} \exp\left(2d\lambda_{\max}\left(\sum_{i=1}^b \rho_i^2 M_i^3 \mathbf{A}_i^\top \mathbf{A}_i\right)/m_U + 2\sum_{i=1}^b \rho_i^2 M_i^3 \|\mathbf{A}_i(\boldsymbol{\theta}^* - \boldsymbol{\theta}_i^*)\|^2\right) \\
 &\quad \exp\left(8L_\beta^4/m_U^2 + 8\left[dL_\beta^2/m_U + \sum_{i=1}^b \rho_i M_i^2 \|\mathbf{A}_i(\boldsymbol{\theta}^* - \boldsymbol{\theta}_i^*)\|^2\right] L_\beta^2/m_U\right) - 2 \prod_{i=1}^b (1 + \rho_i M_i)^{d_i/2} + 1. \tag{S72}
 \end{aligned}$$

It follows by (S70) and (S67) that

$$W_2(\pi_{\boldsymbol{\rho}}, \pi) \leq \sqrt{(2/m_U) \max(A_1^2, A_3)}, \tag{S73}$$

where  $A_1$  and  $A_3$  are given by (S69) and (S72) respectively. Using that  $L_\beta^2 = \mathcal{O}(\bar{\rho})$  and an expansion of the bound as  $\bar{\rho} \rightarrow 0$  completes the proof.  $\square$

#### S4. Proof of Proposition 4 and Proposition 5

As in Section S2, we assume in all this section that  $\boldsymbol{\rho} \in (\mathbb{R}_+^*)^b$  is fixed. For any  $\boldsymbol{\gamma} = (\gamma_1, \dots, \gamma_b) \in (\mathbb{R}_+^*)^b$ , we establish in this section explicit bounds on  $W_2(\pi_{\boldsymbol{\rho}, \boldsymbol{\gamma}, \mathbf{N}}, \pi_{\boldsymbol{\rho}})$  where  $\pi_{\boldsymbol{\rho}}$  is given in (1) and  $\pi_{\boldsymbol{\rho}, \boldsymbol{\gamma}, \mathbf{N}}$  is the marginal distribution defined by

$$\pi_{\boldsymbol{\rho}, \boldsymbol{\gamma}, \mathbf{N}}(\mathbf{A}) = \Pi_{\boldsymbol{\rho}, \boldsymbol{\gamma}, \mathbf{N}}(\mathbf{A} \times \mathbb{R}^p), \quad \mathbf{A} \in \mathcal{B}(\mathbb{R}^d),$$

of the stationary probability measure  $\Pi_{\boldsymbol{\rho}, \boldsymbol{\gamma}, \mathbf{N}}$  associated with the Markov chain  $(Z_n, \theta_n)_{n \geq 0}$  defined in Algorithm 1. Note that in the case  $\mathbf{N} = N(1, \dots, 1)$ , this distribution is independent of  $N$ , see Proposition S13. To this purpose, we define an

“ideal” dynamics from which we cannot sample but which converges geometrically towards  $\Pi_\rho$  under appropriate conditions. The corresponding ideal process will play the same role as the Langevin dynamics for the study of the unadjusted Langevin algorithm (Durmus & Moulines, 2019). This dynamics is defined as follows. Consider first for any  $\theta \in \mathbb{R}^d$ ,  $i \in [b]$ , the stochastic differential equation (SDE) defined by

$$d\tilde{Y}_t^{i,\theta} = -\nabla V_i(\tilde{Y}_t^{i,\theta}) dt - \rho_i^{-1} \mathbf{A}_i \theta + \sqrt{2} dB_t^i, \quad (\text{S74})$$

where  $(B_t^i)_{t \geq 0}$  is a  $d_i$ -dimensional Brownian motion and  $V_i$  is defined in (S20). Note that under **H2-(i)**, this SDE admits a unique strong solution (Revuz & Yor, 2013, Theorem (2.1) in Chapter IX). Denote for any  $i \in [b]$ , the Markov semi-group associated to (S74) by  $(\tilde{R}_{\rho_i,t}^i)_{t \geq 0}$  defined for any  $\tilde{\mathbf{y}}_0^i \in \mathbb{R}^{d_i}$ ,  $t \geq 0$  and  $B_i \in \mathcal{B}(\mathbb{R}^{d_i})$  by

$$\tilde{R}_{\rho_i,t}^i(\tilde{\mathbf{y}}_0^i, B_i | \theta) = \mathbb{P}(\tilde{Y}_t^{i,\theta,\tilde{\mathbf{y}}_0^i} \in B_i),$$

where  $(\tilde{Y}_t^{i,\theta,\tilde{\mathbf{y}}_0^i})_{t \geq 0}$  is a solution of (S74) with  $\tilde{Y}_0^{i,\theta,\tilde{\mathbf{y}}_0^i} = \tilde{\mathbf{y}}_0^i$ . For any bounded measurable function  $f_i : \mathbb{R}^{d_i} \rightarrow \mathbb{R}_+$ , Lemma S20 shows the measurability of the function  $(\theta, \tilde{\mathbf{y}}_0^i) \mapsto \mathbb{E}[f_i(\tilde{Y}_t^{i,\theta,\tilde{\mathbf{y}}_0^i})]$  on  $\mathbb{R}^d \times \mathbb{R}^{d_i}$  and therefore  $\tilde{R}_{\rho_i,t}^i$  is a conditional Markov kernel.

**Lemma S20.** *For any bounded measurable function  $f_i : \mathbb{R}^{d_i} \rightarrow \mathbb{R}_+$  and function  $f_i$  satisfying **H2-(i)**, the mapping  $(\tilde{\theta}_0, \tilde{\mathbf{y}}_0^i) \mapsto \mathbb{E}[f_i(\tilde{Y}_t^{i,\tilde{\theta}_0,\tilde{\mathbf{y}}_0^i})]$  is Borel measurable.*

*Proof.* Consider the following stochastic differential equation

$$\begin{cases} d\tilde{\theta}_t = \mathbf{0}_d, \\ d\tilde{Y}_t^i = -\nabla V_i(\tilde{Y}_t^i) dt - \rho_i^{-1} \mathbf{A}_i \tilde{\theta}_t + \sqrt{2} dB_t^i. \end{cases}$$

Using Revuz & Yor (2013, Theorem (2.4) in Chapter IX), since  $U_i$  satisfies **H2-(i)**, there exists a unique solution  $(\tilde{X}_t^{\tilde{\mathbf{x}}})_{t \geq 0} = (\tilde{\theta}_t, \tilde{Y}_t^i)_{t \geq 0}$  with initial condition  $\tilde{\mathbf{x}} = (\tilde{\theta}_0^\top, (\tilde{\mathbf{y}}_0^i)^\top)^\top \in \mathbb{R}^p$ . Then, the proof follows from Revuz & Yor (2013, Theorem (1.9) in Chapter IX) and the fact that  $\tilde{Y}_t^i$  is the unique solution of (S74) with  $\theta = \tilde{\theta}_0$ .  $\square$

Define for any  $\theta \in \mathbb{R}^d$ ,  $\mathbf{z} = (\mathbf{z}_1^\top, \dots, \mathbf{z}_b^\top)^\top \in \mathbb{R}^p$ , and for  $i \in [b]$ ,  $B_i \in \mathcal{B}(\mathbb{R}^{d_i})$ ,

$$\tilde{Q}_{\rho,\gamma}(\mathbf{z}, B_1 \times \dots \times B_b | \theta) = \prod_{i=1}^b \tilde{R}_{\rho_i, N_i \gamma_i}^i(\mathbf{z}_i, B_i | \theta),$$

and consider the Markov kernel defined, for any  $\mathbf{x}^\top = (\theta^\top, \mathbf{z}^\top)$  and  $A \in \mathcal{B}(\mathbb{R}^d)$ ,  $B \in \mathcal{B}(\mathbb{R}^p)$ , by

$$\tilde{P}_{\rho,\gamma}(\mathbf{x}, A \times B) = \int_B \tilde{Q}_{\rho,\gamma}(\mathbf{z}, d\tilde{\mathbf{z}} | \theta) \int_A \Pi_\rho(d\tilde{\theta} | \tilde{\mathbf{z}}), \quad (\text{S75})$$

where  $\Pi_\rho(\cdot | \tilde{\mathbf{z}})$  is defined in (5). Note that  $P_{\rho,\gamma,N}$  can be interpreted as a discretised version of  $\tilde{P}_{\rho,\gamma}$  using the Euler-Maruyama scheme.

In the sequel, we first derive technical lemmata in Section S4.1 that are used to prove both Proposition 4 and Proposition 5. Based on these lemmata, we then prove each proposition in a dedicated section, namely Section S4.2 and Section S4.3.

#### S4.1. Synchronous coupling and a first estimate

The main idea to prove Proposition 4 and Proposition 5 is to define  $(X_n, \tilde{X}_n)_{n \in \mathbb{N}}$  such that for any  $n \in \mathbb{N}$ ,  $(X_n, \tilde{X}_n)$  is a coupling between  $\delta_{\mathbf{x}} P_{\rho,\gamma,N}^n$  defined in (S17) and  $\delta_{\tilde{\mathbf{x}}} \tilde{P}_{\rho,\gamma}^n$ , and satisfies

$$\mathbb{E} \left[ \left\| X_n - \tilde{X}_n \right\|^2 \right] \leq c_1(\mathbf{x}, \tilde{\mathbf{x}}) e^{-c_2 \min_{i \in [b]} \{\gamma_i m_i\}} + c_3 \gamma^\alpha,$$

where  $c_2, c_3 > 0$  and  $\alpha \in \{1, 2\}$  depending if **H3** holds or not. Conditioning with respect to  $(X_0, \tilde{X}_0)$  with distribution  $\delta_{\mathbf{x}} \otimes \Pi_\rho$ , using the definition of the Wasserstein distance of order 2 and taking  $n \rightarrow \infty$ , we obtain

$$W_2(\pi_\rho, \pi_{\rho,\gamma,N}) \leq W_2(\Pi_\rho, \Pi_{\rho,\gamma,N}) \leq \tilde{c}_3 \gamma^\alpha,$$

where  $\tilde{c}_3 > 0$ . We now provide the rigorous construction of  $(X_n, \tilde{X}_n)_{n \in \mathbb{N}}$ .

Let  $\{(B_t^{(i,n)})_{t \geq 0} : i \in [b], n \in \mathbb{N}\}$  be independent random variables such that for any  $i \in [b]$ , the sequences  $\{(B_t^{(i,n)})_{t \geq 0} : n \in \mathbb{N}\}$  are i.i.d.  $d_i$ -dimensional Brownian motions and let  $(\xi_n)_{n \geq 0}$  be a sequence of i.i.d. standard  $d$ -dimensional Gaussian random variables independent of  $\{(B_t^{(i,n)})_{t \geq 0} : i \in [b], n \in \mathbb{N}\}$ . Consider the stochastic process  $(\tilde{X}_n)_{n \geq 0}$  on  $\mathbb{R}^d \times \mathbb{R}^p$  starting from  $\tilde{X}_0$  distributed according to  $\Pi_\rho$  and defined by the recursion: for  $n \in \mathbb{N}$ ,  $i \in [b]$ ,

$$\tilde{X}_{n+1} = (\tilde{\theta}_{n+1}^\top, \tilde{Z}_{n+1}^\top)^\top, \quad \tilde{Z}_{n+1}^i = \tilde{Y}_{N_i \gamma_i}^{(i,n)}, \quad \tilde{\theta}_{n+1} = \bar{\mathbf{B}}_0^{-1} \mathbf{B}_0^\top \tilde{\mathbf{D}}_0^{1/2} \tilde{Z}_{n+1} + \bar{\mathbf{B}}_0^{-1/2} \xi_{n+1}, \quad (\text{S76})$$

where  $(\tilde{Y}_t^{(i,n)})_{t \geq 0}$ , is a solution of (S74) starting from  $\tilde{Z}_n^i$  with parameter  $\theta \leftarrow \theta_n$ . Similarly to the process  $(X_n)_{n \in \mathbb{N}}$  defined in Algorithm 1, the process  $(\tilde{X}_n)_{n \in \mathbb{N}}$  defines a homogeneous Markov chain. Indeed, it is easy to show that for any  $n \in \mathbb{N}$  and measurable function  $f : \mathbb{R}^p \rightarrow \mathbb{R}_+$ ,  $\mathbb{E}[f(\tilde{Z}_{n+1}) | \tilde{X}_n] = \int_{\mathbb{R}^p} f(\tilde{z}) \tilde{Q}_{\rho, \gamma}(\tilde{Z}_n, d\mathbf{z} | \tilde{\theta}_n)$  and therefore  $(\tilde{X}_n)_{n \in \mathbb{N}}$  is associated with (S75).

**Proposition S21.** Assume **H1-H2-(i)**, and let  $N \in (\mathbb{N}^*)^b, \gamma \in (\mathbb{R}_+^*)^b$ . Then, the Markov kernel  $\tilde{P}_{\rho, \gamma}$  defined in (S75) admits  $\Pi_\rho$  as an invariant probability measure.

*Proof.* By property of the Langevin diffusion defined in (S74), for all  $\theta_0 \in \mathbb{R}^d$ , the Markov kernel  $\tilde{Q}_{\rho, \gamma}(\cdot | \theta_0)$  admits  $\Pi_\rho(\cdot | \theta_0)$  as invariant measure, see e.g. (Roberts & Tweedie, 1996) or (Kent, 1978). Thus, for any  $\theta_0 \in \mathbb{R}^d$  and  $B \in \mathcal{B}(\mathbb{R}^p)$ , we have

$$\int_B \Pi_\rho(\mathbf{z}_1 | \theta_0) d\mathbf{z}_1 = \int_{\mathbf{z}_0 \in \mathbb{R}^p} \tilde{Q}_{\rho, \gamma}(\mathbf{z}_0, B | \theta_0) \Pi_\rho(\mathbf{z}_0 | \theta_0) d\mathbf{z}_0. \quad (\text{S77})$$

Denote by  $\pi_\rho^\theta, \pi_\rho^z$  the marginals under  $\Pi_\rho$ :  $\pi_\rho^\theta(A) = \Pi_\rho(A \times \mathbb{R}^p)$ ,  $\pi_\rho^z(B) = \Pi_\rho(\mathbb{R}^d \times B)$ , for  $A \in \mathcal{B}(\mathbb{R}^d)$  and  $B \in \mathcal{B}(\mathbb{R}^p)$ , and consider the Markov chain  $(\tilde{X}_n)_{n \in \mathbb{N}}$  defined in (S76). For any measurable function  $f : \mathbb{R}^{d+p} \rightarrow \mathbb{R}_+$ , the Fubini-Tonelli theorem gives

$$\begin{aligned} \mathbb{E}[f(\tilde{X}_1)] &= \int_{\mathbb{R}^{d+p}} \int_{\mathbb{R}^{d+p}} f(\mathbf{x}_1) \Pi_\rho(\theta_1 | \mathbf{z}_1) d\theta_1 \tilde{Q}_{\rho, \gamma}(\mathbf{z}_0, d\mathbf{z}_1 | \theta_0) \Pi_\rho(\theta_0, \mathbf{z}_0) d\theta_0 d\mathbf{z}_0 \\ &= \int_{\mathbb{R}^d} \int_{\mathbb{R}^p} f(\mathbf{x}_1) \Pi_\rho(\theta_1 | \mathbf{z}_1) \int_{\mathbb{R}^d} \left[ \int_{\mathbb{R}^p} \tilde{Q}_{\rho, \gamma}(\mathbf{z}_0, d\mathbf{z}_1 | \theta_0) \Pi_\rho(\mathbf{z}_0 | \theta_0) d\mathbf{z}_0 \right] \pi_\rho^\theta(\theta_0) d\theta_0 d\theta_1 \\ &= \int_{\mathbb{R}^d} \int_{\mathbb{R}^p} f(\mathbf{x}_1) \Pi_\rho(\theta_1 | \mathbf{z}_1) \left[ \int_{\theta_0 \in \mathbb{R}^d} \Pi_\rho(\mathbf{z}_1 | \theta_0) \pi_\rho^\theta(\theta_0) d\theta_0 \right] d\mathbf{z}_1 d\theta_1 \\ &= \int_{\mathbb{R}^d} \int_{\mathbb{R}^p} f(\mathbf{x}_1) \Pi_\rho(\theta_1 | \mathbf{z}_1) \pi_\rho^z(\mathbf{z}_1) d\mathbf{z}_1 d\theta_1 \\ &= \int_{\mathbb{R}^{d+p}} f(\mathbf{x}_1) \Pi_\rho(\theta_1, \mathbf{z}_1) d\mathbf{z}_1 d\theta_1 = \mathbb{E}[f(\tilde{X}_0)], \end{aligned} \quad (\text{S78})$$

where we have used (S77) in (S78). Therefore,  $X_1$  has distribution  $\Pi_\rho$  and the Markov kernel  $\tilde{P}_{\rho, \gamma}$  admits  $\Pi_\rho$  as a stationary distribution, which completes the proof.  $\square$

Define by induction the synchronous coupling  $(X_n = (\theta_n, Z_n))_{n \geq 0}, (\tilde{X}_n = (\tilde{\theta}_n, \tilde{Z}_n))_{n \geq 0}$ , starting from  $(\theta_0, Z_0) = (\theta, \mathbf{z})$ ,  $(\tilde{\theta}_0, \tilde{Z}_0)$  distributed according to  $\Pi_\rho$ , for any  $i \in [b]$  and  $n \geq 0$ , as

$$\begin{aligned} \tilde{Z}_{n+1}^i &= \tilde{Y}_{N_i \gamma_i}^{(i,n)}, & \tilde{\theta}_{n+1} &= \bar{\mathbf{B}}_0^{-1} \mathbf{B}_0^\top \tilde{\mathbf{D}}_0^{1/2} \tilde{Z}_{n+1} + \bar{\mathbf{B}}_0^{-1/2} \xi_{n+1}, \\ Z_{n+1}^i &= Y_{N_i \gamma_i}^{(i,n)}, & \theta_{n+1} &= \bar{\mathbf{B}}_0^{-1} \mathbf{B}_0^\top \mathbf{D}_0^{1/2} Z_{n+1} + \bar{\mathbf{B}}_0^{-1/2} \xi_{n+1}, \end{aligned} \quad (\text{S79})$$

where we consider for any  $i \in [b], k \in \mathbb{N}$ , for  $t \in [k\gamma_i, (k+1)\gamma_i)$

$$\begin{aligned} \tilde{Y}_t^{(i,n)} &= \tilde{Y}_{k\gamma_i}^{(i,n)} - \int_{k\gamma_i}^t \nabla V_i(\tilde{Y}_l^{(i,n)}) dl + (t - k\gamma_i)(\rho_i)^{-1} \mathbf{A}_i \tilde{\theta}_n + 2^{1/2} (B_t^{(i,n)} - B_{k\gamma_i}^{(i,n)}), \\ Y_t^{(i,n)} &= Y_{k\gamma_i}^{(i,n)} - (t - k\gamma_i) \nabla V_i(Y_{k\gamma_i}^{(i,n)}) + (t - k\gamma_i)(\rho_i)^{-1} \mathbf{A}_i \theta_n + 2^{1/2} (B_t^{(i,n)} - B_{k\gamma_i}^{(i,n)}). \end{aligned} \quad (\text{S80})$$

Let  $\mathcal{G}_0 = \sigma(Z_0, \tilde{Z}_0, \theta_0, \tilde{\theta}_0)$ , for any  $n \in \mathbb{N}^*$ , let

$$\mathcal{G}_n = \sigma\{(Z_0, \tilde{Z}_0, \theta_0, \tilde{\theta}_0), (B_t^{(i,k)})_{t \geq 0} : i \in [b], k \leq n\}, \quad (\text{S81})$$

and for any  $t \geq 0$ , let  $\mathcal{H}_t^{(n)} = \sigma(\{(B_s^{(i,n)})_{s \leq t} : i \in [b]\})$ , and

$$\mathcal{F}_t^{(n)} \text{ the } \sigma\text{-field generated by } \mathcal{H}_t^{(n)} \text{ and } \mathcal{G}_{n-1}. \quad (\text{S82})$$

Note that  $X_n$  and  $\tilde{X}_n$  are distributed according to  $\Pi_\rho \tilde{P}_\rho^n$  and  $\delta_{\tilde{x}} P_{\rho, \gamma, N}^n$ , respectively. Hence, by definition of the Wasserstein distance of order 2, it follows since  $\Pi_\rho \tilde{P}_\rho^n = \Pi_\rho$  by Proposition S21 that

$$W_2(\Pi_\rho, \delta_{\tilde{x}} P_{\rho, \gamma, N}^n) \leq \mathbb{E} \left[ \|X_n - \tilde{X}_n\|^2 \right]^{1/2}. \quad (\text{S83})$$

We start this section by a first estimate on  $\mathbb{E}[\|X_n - \tilde{X}_n\|^2]^{1/2}$  and some technical results needed for the proof of Proposition 4 and Proposition 5. The following result holds regarding the process  $(\tilde{Y}_t^{(i,n)})_{t \in \mathbb{R}_+}$  defined, for any  $i \in [b]$  and  $n \in \mathbb{N}$ , in (S80).

**Lemma S22.** Assume **H1-H2**. For  $i \in [b], n \in \mathbb{N}$ , denote by  $\mathbf{z}_{n, \star}^i$  the unique minimiser of  $\mathbf{z}_i \in \mathbb{R}^{d_i} \mapsto U_i(\mathbf{z}_i) + \|\mathbf{z}_i - \mathbf{A}_i \tilde{\theta}_n\| / (2\rho_i)$ . Then, for any  $i \in [b], k \in \mathbb{N}$  and  $n \in \mathbb{N}$ ,

$$\mathbb{E}^{\mathcal{G}_n} [\|\tilde{Y}_{k\gamma_i}^{(i,n)} - \mathbf{z}_{n, \star}^i\|^2] \leq d_i / \tilde{m}_i. \quad (\text{S84})$$

where  $\tilde{m}_i$  is defined in (S25).

*Proof.* Let  $n \in \mathbb{N}$ . By Durmus & Moulines (2019, Proposition 1), for  $i \in [b]$  and  $k \in \mathbb{N}$ , we have

$$\mathbb{E}^{\mathcal{F}_{k\gamma_i}^{(n)}} \|\tilde{Y}_{k\gamma_i}^{(i,n)} - \mathbf{z}_{n, \star}^i\|^2 \leq \|\tilde{Z}_n^i - \mathbf{z}_{n, \star}^i\|^2 e^{-2k\gamma_i \tilde{m}_i} + (d_i / \tilde{m}_i) (1 - e^{-2k\gamma_i \tilde{m}_i}). \quad (\text{S85})$$

By (S80), using Proposition S21 we get that  $\tilde{X}_n$  has distribution  $\Pi_\rho$ , therefore given  $\tilde{\theta}_n$ ,  $\tilde{Z}_n$  has distribution  $\Pi_\rho(\cdot | \tilde{\theta}_n)$ . Then, using (S85), Durmus & Moulines (2019, Proposition 1(ii)) combined with **H2**, and since  $(\tilde{Z}_n^1, \dots, \tilde{Z}_n^b)$  are independent given  $\tilde{\theta}_n$ , we get the stated result.  $\square$

**Lemma S23.** Assume **H1** and let  $\mathbf{N} \in (\mathbb{N}^*)^b, \gamma \in (\mathbb{R}_+^*)^b$ . Then, for any  $n \in \mathbb{N}$ , the random variables  $X_n = (\theta_n^\top, Z_n^\top)^\top, \tilde{X}_n = (\tilde{\theta}_n^\top, \tilde{Z}_n^\top)^\top$  defined in (S79) satisfy

$$\|\tilde{X}_{n+1} - X_{n+1}\|^2 \leq (1 + \|\bar{\mathbf{B}}_0^{-1} \mathbf{B}_0^\top \tilde{\mathbf{D}}_0^{1/2}\|^2) \|\tilde{Z}_{n+1} - Z_{n+1}\|^2,$$

where  $\bar{\mathbf{B}}_0, \mathbf{B}_0, \tilde{\mathbf{D}}_0$  are defined in (S2)-(S3).

*Proof.* The proof is similar to the proof of Lemma S3 and is omitted.  $\square$

For any  $k, n \in \mathbb{N}, s \in \mathbb{R}_+$  consider the  $p \times p$  matrices defined by

$$\mathbf{J}(k, s) = \text{diag} \left( \mathbb{1}_{[N_1]}(k+1) \mathbb{1}_{[0, \gamma_1]}(s) \cdot \mathbf{I}_{d_1}, \dots, \mathbb{1}_{[N_b]}(k+1) \mathbb{1}_{[0, \gamma_b]}(s) \cdot \mathbf{I}_{d_b} \right), \quad (\text{S86})$$

$$\begin{aligned} \mathbf{H}_{U,k}^{(n)} &= \text{diag} \left( \gamma_1 \int_0^1 \nabla^2 U_1((1-s)Y_{k\gamma_1}^{(1,n)} + s\tilde{Y}_{k\gamma_1}^{(1,n)}) ds, \right. \\ &\quad \left. \dots, \gamma_b \int_0^1 \nabla^2 U_b((1-s)Y_{k\gamma_b}^{(b,n)} + s\tilde{Y}_{k\gamma_b}^{(b,n)}) ds \right), \end{aligned} \quad (\text{S87})$$

$$\mathbf{C}_k^{(n)} = \mathbf{J}(k, 0) (\mathbf{D}_{\gamma/\rho} + \mathbf{H}_{U,k}^{(n)}), \quad (\text{S88})$$

$$\mathbf{M}_{k+1}^{(n)} = (\mathbf{I}_p - \mathbf{C}_0^{(n)})^{-1} \dots (\mathbf{I}_p - \mathbf{C}_k^{(n)})^{-1}, \quad \text{with } \mathbf{M}_0^{(n)} = \mathbf{I}_p. \quad (\text{S89})$$

Similarly to (S19), for  $n, k \in \mathbb{N}$  and  $i \in [b]$ , consider  $\mathbf{C}_k^{(i,n)}$  corresponding to the  $i$ -th diagonal block of  $\mathbf{C}_k^{(n)}$  defined in (S88), i.e.

$$\mathbf{C}_k^{(i,n)} = \mathbf{1}_{[N_i]}(k+1)\gamma_i \left\{ \rho_i^{-1} \mathbf{I}_{d_i} + \int_0^1 \nabla^2 U_i((1-s)Y_{k\gamma_i}^{(i,n)} + s\tilde{Y}_{k\gamma_i}^{(i,n)}) ds \right\} \in \mathbb{R}^{d_i \times d_i}, \quad (\text{S90})$$

where, for any  $n \in \mathbb{N}$  and  $i \in [b]$ ,  $(Y_{k\gamma_i}^{(i,n)}, \tilde{Y}_{k\gamma_i}^{(i,n)})_{k \in \mathbb{N}}$  is defined in (S80).

**Lemma S24.** Assume H1-H2 and let  $\gamma \in (\mathbb{R}_+^*)^b$  such that, for any  $i \in [b]$ ,  $\gamma_i < 1/\tilde{M}_i$ . Then, for any  $n, k \in \mathbb{N}$ , the matrix  $(\mathbf{I}_p - \mathbf{C}_k^{(n)})$  is invertible and in addition, for any  $i \in [b]$ , we have

$$\|\mathbf{I}_{d_i} - \mathbf{C}_k^{(i,n)}\| \leq 1 - \gamma_i \tilde{m}_i,$$

where  $\mathbf{C}_k^{(i,n)}$  is defined in (S90).

*Proof.* Let  $i \in [b]$ ,  $n, k \in \mathbb{N}$ . By H2, we have  $\|\nabla^2 U_i\| \leq M_i$  which implies by (S90) that  $\|\mathbf{C}_k^{(i,n)}\| \leq \gamma_i \tilde{M}_i$ . Since  $\gamma_i < 1/\tilde{M}_i$ , the matrix  $\mathbf{I}_p - \mathbf{C}_k^{(i,n)}$  is invertible and so is  $\mathbf{I}_p - \mathbf{C}_k^{(n)}$ . In addition, following the same lines as the proof of Lemma S9 implies  $\|\mathbf{I}_{d_i} - \mathbf{C}_k^{(i,n)}\| \leq \max\{|1 - \gamma_i \tilde{m}_i|, |1 - \gamma_i \tilde{M}_i|\} = 1 - \gamma_i \tilde{m}_i$ .  $\square$

For any  $n, k \in \mathbb{N}$ ,  $i \in [b]$ , if  $\gamma_i \in (0, 1/\tilde{M}_i)$ , Lemma S24 shows the invertibility of the matrices  $\mathbf{I}_p - \mathbf{C}_k^{(n)}$ . Therefore,  $\mathbf{M}_\infty^{(n)}$  is invertible and we can define

$$\mathbf{T}_1^{(n)} = [\mathbf{M}_\infty^{(n)}]^{-1} + \sum_{k=0}^{\infty} [\mathbf{M}_\infty^{(n)}]^{-1} \mathbf{M}_{k+1}^{(n)} \mathbf{J}(k, 0) \mathbf{D}_N^{-1/2} \mathbf{D}_{\gamma/\rho}^{1/2} \mathbf{P}_0 \mathbf{D}_{\gamma/\rho}^{1/2} \mathbf{D}_N^{1/2}, \quad (\text{S91})$$

$$\mathbf{T}_2^{(n)} = \sum_{k=0}^{\infty} \left\{ [\mathbf{M}_\infty^{(n)}]^{-1} \mathbf{M}_{k+1}^{(n)} \mathbf{D}_{N\gamma}^{-1/2} \int_0^{+\infty} \mathbf{J}(k, l) [\nabla V(\tilde{Y}_{k\gamma+l}^{(n)}) - \nabla V(\tilde{Y}_{k\gamma}^{(n)})] dl \right\}. \quad (\text{S92})$$

Using these matrices, we have the following result.

**Lemma S25.** Assume H1-H2 and let  $N \in (\mathbb{N}^*)^b$ ,  $\gamma \in (\mathbb{R}_+^*)^b$  such that, for any  $i \in [b]$ ,  $\gamma_i < 1/\tilde{M}_i$ . Then, for any  $n \geq 1$ ,

$$\mathbf{D}_{N\gamma}^{-1/2} (\tilde{Z}_{n+1} - Z_{n+1}) = \mathbf{T}_1^{(n)} (\tilde{Z}_n - Z_n) - \mathbf{T}_2^{(n)}, \quad (\text{S93})$$

where  $(Z_n, \tilde{Z}_n)_{n \in \mathbb{N}}$  is defined in (S79) and  $\mathbf{D}_{N\gamma} = \text{diag}(N_1 \gamma_1 \mathbf{I}_{d_1}, \dots, N_b \gamma_b \mathbf{I}_{d_b}) \in \mathbb{R}^{p \times p}$ .

*Proof.* Let  $i \in [b]$  and  $n \geq 1$ . Recall that  $V_i$  is defined in (S20) and for  $\mathbf{z} \in \mathbb{R}^p$ , denote  $V(\mathbf{z}) = \sum_{i=1}^b V_i(\mathbf{z}_i)$ . For any  $k \in \mathbb{N}$ , we have

$$\nabla V_i(\tilde{Y}_{k\gamma_i}^{(i,n)}) - \nabla V_i(Y_{k\gamma_i}^{(i,n)}) = \left[ \int_0^1 \nabla^2 V_i((1-s)Y_{k\gamma_i}^{(i,n)} + s\tilde{Y}_{k\gamma_i}^{(i,n)}) ds \right] (\tilde{Y}_{k\gamma_i}^{(i,n)} - Y_{k\gamma_i}^{(i,n)}).$$

For  $k \geq 0$ , it follows from (S80) that

$$\begin{aligned} \tilde{Y}_{(k+1)\gamma_i}^{(i,n)} - Y_{(k+1)\gamma_i}^{(i,n)} &= \left( \mathbf{I}_{d_i} - \gamma_i \int_0^1 \nabla^2 V_i((1-s)Y_{k\gamma_i}^{(i,n)} + s\tilde{Y}_{k\gamma_i}^{(i,n)}) ds \right) (\tilde{Y}_{k\gamma_i}^{(i,n)} - Y_{k\gamma_i}^{(i,n)}) \\ &\quad - \int_0^{\gamma_i} [\nabla V_i(\tilde{Y}_{k\gamma_i+l}^{(i,n)}) - \nabla V_i(\tilde{Y}_{k\gamma_i}^{(i,n)})] dl + (\gamma_i/\rho_i) \mathbf{A}_i(\tilde{\theta}_n - \theta_n). \end{aligned} \quad (\text{S94})$$

Consider the process  $(\tilde{Y}_t^{(n)}, Y_t^{(n)})_{t \in \mathbb{R}_+}$  valued in  $\mathbb{R}^p \times \mathbb{R}^p$  and defined for any  $t \geq 0$  by

$$\tilde{Y}_t^{(n)} = \tilde{Y}_{\min(t, N_i \gamma_i)}^{(n)}, \quad Y_t^{(n)} = Y_{\min(t, N_i \gamma_i)}^{(n)}. \quad (\text{S95})$$



The process (S95) is continuous with respect to  $t$  and defined so that its component  $(\tilde{Y}_t^{(i,n)}, Y_t^{(i,n)})$  equals  $(\tilde{Y}_t^i, Y_t^i)$  for  $t \leq N_i \gamma_i$  and is constant for  $t > N_i \gamma_i$ . For  $l \geq 0$ , we write  $(\tilde{Y}_{k\gamma+l}^{(n)}, Y_{k\gamma+l}^{(n)}) = (\tilde{Y}_{k\gamma+l}^{(i,n)}, Y_{k\gamma+l}^{(i,n)})_{i \in [b]} \in \mathbb{R}^p \times \mathbb{R}^p$ . Using the matrices defined in (S89), for  $k \in \mathbb{N}$ , we obtain

$$\begin{aligned} \tilde{Y}_{(k+1)\gamma}^{(n)} - Y_{(k+1)\gamma}^{(n)} &= (\mathbf{I}_p - \mathbf{C}_k^{(n)})(\tilde{Y}_{k\gamma}^{(n)} - Y_{k\gamma}^{(n)}) - \int_0^\infty \mathbf{J}(k, l) [\nabla V(\tilde{Y}_{k\gamma+l}^{(n)}) - \nabla V(Y_{k\gamma+l}^{(n)})] dl \\ &\quad + \mathbf{J}(k, 0) \mathbf{D}_{\gamma/\sqrt{\rho}} \mathbf{P}_0 \tilde{\mathbf{D}}_0^{1/2} (\tilde{Y}_0^{(n)} - Y_0^{(n)}), \end{aligned} \quad (\text{S96})$$

where  $\mathbf{P}_0$  is defined in (S3). Recall the matrix  $\mathbf{M}_k^{(n)}$  defined in (S89) with  $\mathbf{M}_0^{(n)} = \mathbf{I}_p$  and for  $k \geq 1$ ,  $\mathbf{M}_k^{(n)} = (\mathbf{I}_p - \mathbf{C}_0^{(n)})^{-1} \dots (\mathbf{I}_p - \mathbf{C}_{k-1}^{(n)})^{-1}$ . By multiplying (S96) by  $\mathbf{M}_{k+1}^{(n)} \mathbf{D}_{N\gamma}^{-1/2}$ , we have

$$\begin{aligned} \mathbf{M}_{k+1}^{(n)} \mathbf{D}_{N\gamma}^{-1/2} (\tilde{Y}_{(k+1)\gamma}^{(n)} - Y_{(k+1)\gamma}^{(n)}) &= \mathbf{M}_k^{(n)} \mathbf{D}_{N\gamma}^{-1/2} (\tilde{Y}_{k\gamma}^{(n)} - Y_{k\gamma}^{(n)}) \\ &\quad - \mathbf{M}_{k+1}^{(n)} \mathbf{D}_{N\gamma}^{-1/2} \int_0^\infty \mathbf{J}(k, l) [\nabla V(\tilde{Y}_{k\gamma+l}^{(n)}) - \nabla V(Y_{k\gamma+l}^{(n)})] dl \\ &\quad + \mathbf{M}_{k+1}^{(n)} \mathbf{J}(k, 0) \mathbf{D}_N^{-1/2} \mathbf{D}_{\gamma/\rho}^{1/2} \mathbf{P}_0 \tilde{\mathbf{D}}_0^{1/2} (\tilde{Y}_0^{(n)} - Y_0^{(n)}). \end{aligned}$$

By (S95) and (S79), we have for  $t \geq \max_{i \in [b]} \{\gamma_i N_i\}$ ,  $(\tilde{Z}_{n+1}, Z_{n+1}) = (\tilde{Y}_t, Y_t)$ . Therefore, summing the previous expression over  $k$ , we get

$$\begin{aligned} \mathbf{M}_\infty^{(n)} \mathbf{D}_{N\gamma}^{-1/2} (\tilde{Z}_{n+1} - Z_{n+1}) &= - \sum_{k=0}^\infty \mathbf{M}_{k+1}^{(n)} \mathbf{D}_{N\gamma}^{-1/2} \int_0^\infty \mathbf{J}(k, l) [\nabla V(\tilde{Y}_{k\gamma+l}^{(n)}) - \nabla V(Y_{k\gamma+l}^{(n)})] dl \\ &\quad + \left[ \mathbf{M}_0^{(n)} + \sum_{k=0}^\infty \mathbf{M}_{k+1}^{(n)} \mathbf{J}(k, 0) \mathbf{D}_N^{-1/2} \mathbf{D}_{\gamma/\rho}^{1/2} \mathbf{P}_0 \mathbf{D}_{\gamma/\rho}^{1/2} \mathbf{D}_N^{1/2} \right] \mathbf{D}_{N\gamma}^{-1/2} \cdot (\tilde{Z}_n - Z_n). \end{aligned}$$

By Lemma S24,  $\mathbf{M}_\infty^{(n)}$  is invertible and the proof is concluded by multiplying the previous equality by  $[\mathbf{M}_\infty^{(n)}]^{-1}$ .  $\square$

Based on Lemma S25, we have the following relation between  $\|\tilde{Z}_{n+1} - Z_{n+1}\|^2$  and  $\|\tilde{Z}_n - Z_n\|^2$ .

**Lemma S26.** Assume H1-H2 and let  $N \in (\mathbb{N}^*)^b, \gamma \in (\mathbb{R}_+^*)^b$  such that, for any  $i \in [b]$ ,  $\gamma_i < 1/\tilde{M}_i$ . Then, for any  $\epsilon > 0$  and  $n \geq 1$ ,

$$\|\tilde{Z}_{n+1} - Z_{n+1}\|_{\mathbf{D}_{N\gamma}^{-1}}^2 \leq (1 + 2\epsilon) \|\mathbf{T}_1^{(n)}\|^2 \|\tilde{Z}_n - Z_n\|_{\mathbf{D}_{N\gamma}^{-1}}^2 + (1 + 1/\{2\epsilon\}) \|\mathbf{T}_2^{(n)}\|^2.$$

where  $(Z_n, \tilde{Z}_n)_{n \in \mathbb{N}}$  is defined in (S79) and  $\mathbf{D}_{N\gamma} = \text{diag}(N_1 \gamma_1 \mathbf{I}_{d_1}, \dots, N_b \gamma_b \mathbf{I}_{d_b}) \in \mathbb{R}^{p \times p}$ .

*Proof.* The proof follows from Lemma S25 and by using the fact that for  $\mathbf{a}, \mathbf{b} \in \mathbb{R}^p, \epsilon > 0$  we have  $2\langle \mathbf{a}, \mathbf{b} \rangle \leq 2\epsilon \|\mathbf{a}\|^2 + (1/\{2\epsilon\}) \|\mathbf{b}\|^2$ .  $\square$

Similarly to Lemma S10, we have the following result regarding the contracting term.

**Lemma S27.** Assume H1-H2 and let  $N \in (\mathbb{N}^*)^b, \gamma \in (\mathbb{R}_+^*)^b$  such that, for any  $i \in [b]$ ,  $\gamma_i < 1/\tilde{M}_i$  and  $N_i \gamma_i \leq 2/(m_i + \tilde{M}_i)$ . Then, for any  $n \geq 0$ , we have

$$\|\mathbf{T}_1^{(n)}\| \leq 1 - \min_{i \in [b]} \{N_i \gamma_i m_i\} + r_{\gamma, \rho, N},$$

where  $\mathbf{T}_1^{(n)}$  and  $r_{\gamma, \rho, N}$  are defined in (S91) and (S33), respectively.

*Proof.* The proof is similar to the proof of Lemma S10 and therefore is omitted.  $\square$

In the next lemma, we upper bound the coefficient  $r_{\gamma, \rho, N}$  defined in (S33). For this, we explicit a choice of  $N$  that we denote  $N^* = (N_1^*(\gamma_1), \dots, N_b^*(\gamma_b)) \in (\mathbb{N}^*)^b$  defined for any  $i \in [b]$ , any  $\gamma_i > 0$ , by

$$N_i^*(\gamma_i) = \lfloor m_i \min_{i \in [b]} \{m_i / \tilde{M}_i\}^2 / (20 \gamma_i \tilde{M}_i^2 \max_{i \in [b]} \{m_i / \tilde{M}_i\}^2) \rfloor, \quad (\text{S97})$$

where  $\tilde{M}_i = M_i + 1/\rho_i$ .

**Lemma S28.** Assume **H1-H2** and let  $\gamma \in (\mathbb{R}_+^*)^b$  such that, for any  $i \in [b]$ ,

$$\gamma_i \leq \frac{m_i}{40\tilde{M}_i^2} \left( \frac{\min_{i \in [b]} \{m_i/\tilde{M}_i\}}{\max_{i \in [b]} \{m_i/\tilde{M}_i\}} \right)^2.$$

Then, for any  $i \in [b]$ , we have  $N_i^*(\gamma_i) \in \mathbb{N}^*$  and

$$r_{\gamma, \rho, N^*} < \min_{i \in [b]} \{N_i^*(\gamma_i) \gamma_i m_i\} / 2,$$

where  $r_{\gamma, \rho, N^*}$  is defined in (S33).

*Proof.* The assumption on  $\gamma_i$  combined with the definition (S97) of  $N_i^*(\gamma_i)$  imply  $N_i^*(\gamma_i) \geq 2$ , using in addition  $m_i \leq M_i$ ,  $\max_{i \in [b]} \{N_i^*(\gamma_i) \gamma_i \tilde{M}_i \mathbb{1}_{N_i^*(\gamma_i) > 1}\} \leq 1/20$  and

$$\begin{aligned} \frac{1}{20} \left( \frac{\min_{i \in [b]} \{m_i/\tilde{M}_i\}}{\max_{i \in [b]} \{m_i/\tilde{M}_i\}} \right)^2 &\geq \frac{N_i^*(\gamma_i) \gamma_i \tilde{M}_i^2}{m_i} > \frac{1}{20} \left( \frac{\min_{i \in [b]} \{m_i/\tilde{M}_i\}}{\max_{i \in [b]} \{m_i/\tilde{M}_i\}} \right)^2 - \frac{\gamma_i \tilde{M}_i^2}{m_i} \\ &\geq \frac{1}{40} \left( \frac{\min_{i \in [b]} \{m_i/\tilde{M}_i\}}{\max_{i \in [b]} \{m_i/\tilde{M}_i\}} \right)^2. \end{aligned} \quad (\text{S98})$$

Using the definition (S33) of  $r_{\gamma, \rho, N}$ , we have  $r_{\gamma, \rho, N} < 5 \max_{i \in [b]} \{N_i^*(\gamma_i) \gamma_i \tilde{M}_i \mathbb{1}_{N_i^*(\gamma_i) > 1}\}^2$ . Thus, plugging (S98) in the previous inequality gives

$$r_{\gamma, \rho, N} \leq \max_{i \in [b]} \{m_i/\tilde{M}_i\}^2 \max_{i \in [b]} \left\{ \frac{N_i^*(\gamma_i) \gamma_i \tilde{M}_i^2}{m_i} \right\} < \frac{\min_{i \in [b]} \{m_i/\tilde{M}_i\}^4}{80 \max_{i \in [b]} \{m_i/\tilde{M}_i\}^2}. \quad (\text{S99})$$

In addition, (S98) also shows that

$$\frac{1}{40} \left( \frac{\min_{i \in [b]} \{m_i/\tilde{M}_i\}}{\max_{i \in [b]} \{m_i/\tilde{M}_i\}} \right)^2 \left( \frac{m_i}{\tilde{M}_i} \right)^2 \leq N_i^*(\gamma_i) \gamma_i m_i. \quad (\text{S100})$$

Therefore, combining (S99) and (S100) completes the proof.  $\square$

#### S4.2. Proof of Proposition 4

We first give the formal statement of Proposition 4.

**Proposition S29.** Assume **H 1-H 2** and let  $\gamma \in (\mathbb{R}_+^*)^b$ ,  $N \in (\mathbb{N}^*)^b$  such that for any  $i \in [b]$ ,  $\gamma_i \leq m_i/40\tilde{M}_i^2(\min_{i \in [b]} \{m_i/\tilde{M}_i\}/\max_{i \in [b]} \{m_i/\tilde{M}_i\})^2$  and  $N_i = \lfloor m_i \min_{i \in [b]} \{m_i/\tilde{M}_i\}^2 / (20\gamma_i \tilde{M}_i^2 \max_{i \in [b]} \{m_i/\tilde{M}_i\}^2) \rfloor$ . Then, we have

$$\begin{aligned} W_2^2(\Pi_{\rho, \gamma, N}, \Pi_{\rho}) &\leq \frac{4(1 + \|\bar{\mathbf{B}}_0^{-1} \mathbf{B}_0^{\top} \tilde{\mathbf{D}}_0^{1/2}\|^2) \max_{i \in [b]} \{m_i/\tilde{M}_i\}}{5 \min_{i \in [b]} \{m_i/\tilde{M}_i\}^2 \max_{i \in [b]} \{m_i/\tilde{M}_i\}^2} \\ &\quad \times \sum_{i=1}^b d_i \gamma_i m_i (1 + \gamma_i^2 \tilde{M}_i^2/12 + \gamma_i \tilde{M}_i^2/(2\tilde{m}_i)), \end{aligned}$$

where  $\bar{\mathbf{B}}_0, \mathbf{B}_0, \tilde{\mathbf{D}}_0$  are defined in (S2)-(S3), and for any  $i \in [b]$ ,  $\tilde{m}_i, \tilde{M}_i$  are defined in (S25).

By Lemma S23 and Lemma S26, we can note that the proof of Proposition S29 boils down to derive an upper bound on  $\|\mathbf{T}_2^{(n)}\|^2$  defined in (S92) for  $n \in \mathbb{N}$ . The following lemma provides such a bound.

**Lemma S30.** Assume **H1-H2** and let  $N \in (\mathbb{N}^*)^b, \gamma \in (\mathbb{R}_+^*)^b$  such that, for any  $i \in [b]$ ,  $\gamma_i < 1/\tilde{M}_i$ . Then, for any  $n \in \mathbb{N}$ , we have

$$\mathbb{E} \left[ \|\mathbf{T}_2^{(n)}\|^2 \right] \leq \sum_{i=1}^b d_i N_i \gamma_i^2 \tilde{M}_i^2 \left[ 1 + \gamma_i^2 \tilde{M}_i^2/12 + \gamma_i \tilde{M}_i^2/(2\tilde{m}_i) \right],$$

where  $\tilde{m}_i, \tilde{M}_i, \mathbf{T}_2^{(n)}$  are defined in (S25) and (S92), respectively.

*Proof.* Let  $n \in \mathbb{N}$ . Using (S86), we can write, for any  $l \in \mathbb{R}_+$  and  $k \in \mathbb{N}$ ,  $\mathbf{J}(k, l)$  as a block-diagonal matrix  $\text{diag}(\mathbf{J}^1(k, l), \dots, \mathbf{J}^b(k, l))$  with  $\mathbf{J}^i(k, l) = \mathbb{1}_{[N_i]}(k+1) \mathbb{1}_{[0, \gamma_i]}(s) \cdot \mathbf{I}_{d_i}$  for any  $i \in [b]$ . By (S89) and using for any  $k \in \mathbb{N}$ , that  $[\mathbf{M}_\infty^{(n)}]^{-1} \mathbf{M}_{k+1}^{(n)} = \prod_{l=k+1}^\infty (\mathbf{I}_{d_i} - \mathbf{C}_l^{(i,n)})$  is finite by (S88), we have

$$\begin{aligned} \|\mathbf{T}_2^{(n)}\|^2 &= \left\| \sum_{k=0}^\infty [\mathbf{M}_\infty^{(n)}]^{-1} \mathbf{M}_{k+1}^{(n)} \mathbf{D}_{N_\gamma}^{-1/2} \int_0^\infty \mathbf{J}(k, l) [\nabla V(\tilde{Y}_{k\gamma+l}^{(n)}) - \nabla V(\tilde{Y}_{k\gamma}^{(n)})] dl \right\|^2 \\ &= \sum_{i=1}^b \frac{1}{N_i \gamma_i} \left\| \sum_{k=0}^\infty \prod_{l=k+1}^\infty (\mathbf{I}_{d_i} - \mathbf{C}_l^{(i,n)}) \int_0^{\gamma_i} \mathbf{J}^i(k, 0) [\nabla V_i(\tilde{Y}_{k\gamma_i+l}^{(i,n)}) - \nabla V_i(\tilde{Y}_{k\gamma_i}^{(i,n)})] dl \right\|^2. \end{aligned} \quad (\text{S101})$$

Since for any  $i \in [b]$ ,  $k \geq N_i$  we have  $\mathbf{J}^i(k, 0) = \mathbf{C}_l^{(i,n)} = \mathbf{0}_{d_i \times d_i}$ , (S101) can be rewritten as

$$\|\mathbf{T}_2^{(n)}\|^2 = \sum_{i=1}^b \frac{1}{N_i \gamma_i} \left\| \sum_{k=0}^{N_i-1} \prod_{l=k+1}^{N_i-1} (\mathbf{I}_{d_i} - \mathbf{C}_l^{(i,n)}) \int_0^{\gamma_i} \mathbf{J}^i(k, 0) [\nabla V_i(\tilde{Y}_{k\gamma_i+l}^{(i,n)}) - \nabla V_i(\tilde{Y}_{k\gamma_i}^{(i,n)})] dl \right\|^2,$$

and the Cauchy-Schwarz inequality gives

$$\|\mathbf{T}_2^{(n)}\|^2 \leq \sum_{i=1}^b \frac{1}{\gamma_i} \left( \sum_{k=0}^{N_i-1} \left\| \prod_{l=k+1}^{N_i-1} (\mathbf{I}_{d_i} - \mathbf{C}_l^{(i,n)}) \right\|^2 \left\| \int_0^{\gamma_i} [\nabla V_i(\tilde{Y}_{k\gamma_i+l}^{(i,n)}) - \nabla V_i(\tilde{Y}_{k\gamma_i}^{(i,n)})] dl \right\|^2 \right). \quad (\text{S102})$$

Since, for any  $i \in [b]$ ,  $\gamma_i \tilde{M}_i < 1$ , we get using Lemma S24,

$$\left\| \prod_{l=k+1}^{N_i-1} (\mathbf{I}_{d_i} - \mathbf{C}_l^{(i,n)}) \right\|^2 \leq \{1 - \gamma_i \tilde{m}_i\}^{2(N_i-k-1)}.$$

By combining (S102) with the previous result and the Jensen inequality, we have

$$\|\mathbf{T}_2^{(n)}\|^2 \leq \sum_{i=1}^b \sum_{k=0}^{N_i-1} \{1 - \gamma_i \tilde{m}_i\}^{2(N_i-k-1)} \int_0^{\gamma_i} \left\| \nabla V_i(\tilde{Y}_{k\gamma_i+l}^{(i,n)}) - \nabla V_i(\tilde{Y}_{k\gamma_i}^{(i,n)}) \right\|^2 dl. \quad (\text{S103})$$

For  $i \in [b]$ , using Durmus & Moulines (2019, Lemma 21) applied to the potential  $V_i^\theta : \mathbf{y}^i \mapsto U_i(\mathbf{y}^i) + \|\mathbf{y}^i - \mathbf{A}_i \theta\|^2 / (2\rho_i)$  yields

$$\begin{aligned} \int_0^{\gamma_i} \mathbb{E}^{\mathcal{F}_{k\gamma_i}^{(n)}} \left\| \nabla V_i(\tilde{Y}_{k\gamma_i+l}^{(i,n)}) - \nabla V_i(\tilde{Y}_{k\gamma_i}^{(i,n)}) \right\|^2 dl &= \int_0^{\gamma_i} \mathbb{E}^{\mathcal{F}_{k\gamma_i}^{(n)}} \left\| \nabla V_i^{\tilde{\theta}_n}(\tilde{Y}_{k\gamma_i+l}^{(i,n)}) - \nabla V_i^{\tilde{\theta}_n}(\tilde{Y}_{k\gamma_i}^{(i,n)}) \right\|^2 dl \\ &\leq \gamma_i^2 \tilde{M}_i^2 \left[ d_i + d_i \gamma_i^2 \tilde{M}_i^2 / 12 + (\gamma_i \tilde{M}_i^2 / 2) \|\tilde{Y}_{k\gamma_i}^{(i,n)} - \mathbf{z}_{n,\star}^i\|^2 \right], \end{aligned} \quad (\text{S104})$$

where  $\mathbf{z}_{n,\star}^i = \arg \min_{\mathbf{z}_i \in \mathbb{R}^{d_i}} V_i^{\tilde{\theta}_n}(\mathbf{z}_i)$ .

By (S104), (S84), Lemma S22 and since  $\max_{i \in [b]} \gamma_i \tilde{m}_i < 1$ , we get

$$\begin{aligned} \sum_{i=1}^b \sum_{k=0}^{N_i-1} \{1 - \gamma_i \tilde{m}_i\}^{2(N_i-k-1)} \int_0^{\gamma_i} \mathbb{E} \left\| \nabla V_i(\tilde{Y}_{k\gamma_i+l}^{(i,n)}) - \nabla V_i(\tilde{Y}_{k\gamma_i}^{(i,n)}) \right\|^2 dl \\ \leq \sum_{i=1}^b d_i N_i \gamma_i^2 \tilde{M}_i^2 [1 + \gamma_i^2 \tilde{M}_i^2 / 12 + \gamma_i \tilde{M}_i^2 / (2\tilde{m}_i)]. \end{aligned}$$

Combining this result with (S103) completes the proof.  $\square$

We can now combine Lemma S30 and Lemma S27 with Lemma S26 to get the following bound.

**Lemma S31.** Assume **H1-H2** and let  $\mathbf{N} \in (\mathbb{N}^*)^b, \gamma \in (\mathbb{R}_+^*)^b$  such that, for any  $i \in [b]$ ,  $\gamma_i < 1/\tilde{M}_i$ ,  $N_i\gamma_i \leq 2/(m_i + \tilde{M}_i)$ . Suppose in addition  $\kappa_{\gamma,\rho,\mathbf{N}} = \min_{i \in [b]} \{N_i\gamma_i m_i\} - r_{\gamma,\rho,\mathbf{N}} \in (0, 1)$ , where  $r_{\gamma,\rho,\mathbf{N}}$  is defined in (S33). Then, for  $n \geq 1$ , we have

$$\mathbb{E} \left[ \|\tilde{Z}_n - Z_n\|_{\mathbf{D}_{\mathbf{N}\gamma}^{-1}}^2 \right] \leq (1 - \kappa_{\gamma,\rho,\mathbf{N}} + \kappa_{\gamma,\rho,\mathbf{N}}^2/2)^{2(n-1)} \mathbb{E} \left[ \|\tilde{Z}_1 - Z_1\|_{\mathbf{D}_{\mathbf{N}\gamma}^{-1}}^2 \right] + 2\kappa_{\gamma,\rho,\mathbf{N}}^{-2} \sum_{i=1}^b d_i N_i \gamma_i^2 \tilde{M}_i^2 \left( 1 + \frac{\gamma_i^2 \tilde{M}_i^2}{12} + \frac{\gamma_i \tilde{M}_i^2}{2\tilde{m}_i} \right),$$

where, for any  $i \in [b]$ ,  $\tilde{M}_i$  and  $\tilde{m}_i$  are defined in (S25).

*Proof.* Taking expectation in Lemma S26, we get for any  $n \in \mathbb{N}, \epsilon > 0$  that

$$\mathbb{E} \left[ \|\tilde{Z}_{n+1} - Z_{n+1}\|_{\mathbf{D}_{\mathbf{N}\gamma}^{-1}}^2 \right] \leq (1 + 2\epsilon) \mathbb{E} \left[ \|\mathbf{T}_1^{(n)}\|^2 \|\tilde{Z}_n - Z_n\|_{\mathbf{D}_{\mathbf{N}\gamma}^{-1}}^2 \right] + (1 + 1/\{2\epsilon\}) \mathbb{E} \left[ \|\mathbf{T}_2^{(n)}\|^2 \right],$$

where  $\mathbf{T}_1^{(n)}$  and  $\mathbf{T}_2^{(n)}$  are defined in (S91) and (S92), respectively. To ease notation, denote  $\mathbf{B} = \sum_{i=1}^b d_i N_i \gamma_i^2 \tilde{M}_i^2 (1 + \gamma_i^2 \tilde{M}_i^2/12 + \gamma_i \tilde{M}_i^2/(2\tilde{m}_i))$ . Using Lemma S30, we obtain for any  $n \in \mathbb{N}, \epsilon > 0$

$$\mathbb{E} \left[ \|\tilde{Z}_{n+1} - Z_{n+1}\|_{\mathbf{D}_{\mathbf{N}\gamma}^{-1}}^2 \right] \leq (1 + 2\epsilon) \mathbb{E} \left[ \|\mathbf{T}_1^{(n)}\|^2 \|\tilde{Z}_n - Z_n\|_{\mathbf{D}_{\mathbf{N}\gamma}^{-1}}^2 \right] + (1 + 1/\{2\epsilon\}) \mathbf{B}. \quad (\text{S105})$$

In addition, Lemma S27 implies that  $\|\mathbf{T}_1^{(n)}\|^2 \leq (1 - \kappa_{\gamma,\rho,\mathbf{N}})^2$  almost surely. Therefore, taking  $\epsilon = (1 - [1 - \kappa_{\gamma,\rho,\mathbf{N}}]^2)/(4[1 - \kappa_{\gamma,\rho,\mathbf{N}}]^2)$ , (S105) yields for any  $n \geq 0$ ,

$$\mathbb{E} \left[ \|\tilde{Z}_{n+1} - Z_{n+1}\|_{\mathbf{D}_{\mathbf{N}\gamma}^{-1}}^2 \right] \leq \frac{1 + (1 - \kappa_{\gamma,\rho,\mathbf{N}})^2}{2} \mathbb{E} \left[ \|\tilde{Z}_n - Z_n\|_{\mathbf{D}_{\mathbf{N}\gamma}^{-1}}^2 \right] + \frac{1 + (1 - \kappa_{\gamma,\rho,\mathbf{N}})^2}{1 - (1 - \kappa_{\gamma,\rho,\mathbf{N}})^2} \mathbf{B}.$$

An easy induction implies for any  $n \geq 1$ ,

$$\mathbb{E} [\|\tilde{Z}_n - Z_n\|_{\mathbf{D}_{\mathbf{N}\gamma}^{-1}}^2] \leq \left( \frac{1 + (1 - \kappa_{\gamma,\rho,\mathbf{N}})^2}{2} \right)^{n-1} \mathbb{E} [\|\tilde{Z}_1 - Z_1\|_{\mathbf{D}_{\mathbf{N}\gamma}^{-1}}^2] + 2 \frac{1 + (1 - \kappa_{\gamma,\rho,\mathbf{N}})^2}{(1 - (1 - \kappa_{\gamma,\rho,\mathbf{N}})^2)^2} \mathbf{B}. \quad (\text{S106})$$

Since  $\kappa_{\gamma,\rho,\mathbf{N}}^2 = (\min_{i \in [b]} \{N_i\gamma_i m_i\} + r_{\gamma,\rho,\mathbf{N}})^2$  and using  $\kappa_{\gamma,\rho,\mathbf{N}}^2 \leq 1$ , we obtain

$$\begin{aligned} (1 + (1 - \kappa_{\gamma,\rho,\mathbf{N}})^2)/2 &= 1 - \kappa_{\gamma,\rho,\mathbf{N}} + \kappa_{\gamma,\rho,\mathbf{N}}^2/2, \\ (1 + (1 - \kappa_{\gamma,\rho,\mathbf{N}})^2)/(1 - (1 - \kappa_{\gamma,\rho,\mathbf{N}})^2)^2 &\leq \kappa_{\gamma,\rho,\mathbf{N}}^{-2}. \end{aligned}$$

Combining these inequalities with (S106) and (S105) completes the proof.  $\square$

**Lemma S32.** Assume **H1-H2** and let  $\mathbf{N} \in (\mathbb{N}^*)^b, \gamma \in (\mathbb{R}_+^*)^b$  such that, for any  $i \in [b]$ ,  $\gamma_i < 1/\tilde{M}_i$ ,  $N_i\gamma_i \leq 2/(m_i + \tilde{M}_i)$  and  $\kappa_{\gamma,\rho,\mathbf{N}} = \min_{i \in [b]} \{N_i\gamma_i m_i\} - r_{\gamma,\rho,\mathbf{N}} \in (0, 1)$ , where  $r_{\gamma,\rho,\mathbf{N}}$  is defined in (S33). Then, for any  $\mathbf{x} \in \mathbb{R}^{d+p}$  and  $n \geq 1$ , we have

$$\begin{aligned} &W_2^2(\delta_{\mathbf{x}} P_{\rho,\gamma,\mathbf{N}}^n, \Pi_\rho) \\ &\leq (1 - \kappa_{\gamma,\rho,\mathbf{N}} + \kappa_{\gamma,\rho,\mathbf{N}}^2/2)^{2(n-1)} (1 + \|\bar{\mathbf{B}}_0^{-1} \mathbf{B}_0^\top \tilde{\mathbf{D}}_0^{1/2}\|^2) \max_{i \in [b]} \{N_i\gamma_i\} \mathbb{E} [\|\tilde{Z}_1 - Z_1\|_{\mathbf{D}_{\mathbf{N}\gamma}^{-1}}^2] \\ &\quad + \frac{2(1 + \|\bar{\mathbf{B}}_0^{-1} \mathbf{B}_0^\top \tilde{\mathbf{D}}_0^{1/2}\|^2) \max_{i \in [b]} \{N_i\gamma_i\}}{\kappa_{\gamma,\rho,\mathbf{N}}^2} \sum_{i=1}^b d_i N_i \gamma_i^2 \tilde{M}_i^2 [1 + \gamma_i^2 \tilde{M}_i^2/12 + \gamma_i \tilde{M}_i^2/(2\tilde{m}_i)], \end{aligned}$$

where  $\bar{\mathbf{B}}_0, \mathbf{B}_0, \tilde{\mathbf{D}}_0$  are defined in (S2)-(S3),  $P_{\rho,\gamma,\mathbf{N}}$  is defined in (S17),  $(\tilde{Z}_n, Z_n)_{n \in \mathbb{N}}$  is defined in (S79) and for any  $i \in [b]$ ,  $\tilde{M}_i, \tilde{m}_i$  are defined in (S25).

*Proof.* By Lemma S31, we have the following upper bound for  $n \geq 1$ ,

$$\begin{aligned} \mathbb{E} \left[ \|\tilde{Z}_n - Z_n\|_{\mathbf{D}_{N\gamma}^{-1}}^2 \right] &\leq (1 - \kappa_{\gamma, \rho, N} + \kappa_{\gamma, \rho, N}^2/2)^{2(n-1)} \mathbb{E} \left[ \|\tilde{Z}_1 - Z_1\|_{\mathbf{D}_{N\gamma}^{-1}}^2 \right] \\ &\quad + 2\kappa_{\gamma, \rho, N}^{-2} \sum_{i=1}^b d_i N_i \gamma_i^2 \tilde{M}_i^2 \left( 1 + \frac{\gamma_i^2 \tilde{M}_i^2}{12} + \frac{\gamma_i \tilde{M}_i^2}{2\tilde{m}_i} \right). \end{aligned}$$

Using (S79), Lemma S23, combined with the previous inequality, we get for any  $n \geq 1$ ,  $\mathbf{x} \in \mathbb{R}^{d+p}$ ,

$$\begin{aligned} &W_2^2(\Pi_{\rho}, \delta_{\mathbf{x}} P_{\rho, \gamma, N}^n) \\ &\leq (1 + \|\bar{\mathbf{B}}_0^{-1} \mathbf{B}_0^{\top} \tilde{\mathbf{D}}_0^{1/2}\|^2) \mathbb{E} [\|\tilde{Z}_n - Z_n\|^2] \\ &\leq (1 + \|\bar{\mathbf{B}}_0^{-1} \mathbf{B}_0^{\top} \tilde{\mathbf{D}}_0^{1/2}\|^2) \max_{i \in [b]} \{N_i \gamma_i\} \mathbb{E} [\|\tilde{Z}_n - Z_n\|_{\mathbf{D}_{N\gamma}^{-1}}^2] \\ &\leq (1 - \kappa_{\gamma, \rho, N} + \kappa_{\gamma, \rho, N}^2/2)^{2(n-1)} (1 + \|\bar{\mathbf{B}}_0^{-1} \mathbf{B}_0^{\top} \tilde{\mathbf{D}}_0^{1/2}\|^2) \max_{i \in [b]} \{N_i \gamma_i\} \mathbb{E} [\|\tilde{Z}_1 - Z_1\|_{\mathbf{D}_{N\gamma}^{-1}}^2] \\ &\quad + \frac{2(1 + \|\bar{\mathbf{B}}_0^{-1} \mathbf{B}_0^{\top} \tilde{\mathbf{D}}_0^{1/2}\|^2) \max_{i \in [b]} \{N_i \gamma_i\}}{\kappa_{\gamma, \rho, N}^2} \sum_{i=1}^b d_i N_i \gamma_i^2 \tilde{M}_i^2 \left( 1 + \frac{\gamma_i^2 \tilde{M}_i^2}{12} + \frac{\gamma_i \tilde{M}_i^2}{2\tilde{m}_i} \right). \end{aligned}$$

Hence the stated result.  $\square$

#### Proof of Proposition 4/Proposition S29.

*Proof.* Since for any  $i \in [b]$ ,  $\gamma_i \leq m_i/40\tilde{M}_i^2(\min_{i \in [b]} \{m_i/\tilde{M}_i\}/\max_{i \in [b]} \{m_i/\tilde{M}_i\})^2$ , setting

$$N_i^*(\gamma_i) = \lfloor m_i \min_{i \in [b]} \{m_i/\tilde{M}_i\}^2 / (20\gamma_i \tilde{M}_i^2 \max_{i \in [b]} \{m_i/\tilde{M}_i\}^2) \rfloor$$

implies  $\kappa_{\gamma, \rho, N^*} \in (0, 1)$  by Lemma S28. Thereby, letting  $n$  tend towards infinity in Lemma S32 and using Proposition S13 conclude the proof.  $\square$

#### S4.3. Proof of Proposition 5

We first give the formal statement of Proposition 5.

**Proposition S33.** Assume **H1-H2-H3** and let  $\gamma \in (\mathbb{R}_+^*)^b$ ,  $N \in (\mathbb{N}^*)^b$  such that for any  $i \in [b]$ ,  $\gamma_i \leq m_i/40\tilde{M}_i^2(\min_{i \in [b]} \{m_i/\tilde{M}_i\}/\max_{i \in [b]} \{m_i/\tilde{M}_i\})^2$  and  $N_i = \lfloor m_i \min_{i \in [b]} \{m_i/\tilde{M}_i\}^2 / (20\gamma_i \tilde{M}_i^2 \max_{i \in [b]} \{m_i/\tilde{M}_i\}^2) \rfloor$ . Then, we have

$$W_2^2(\Pi_{\rho, \gamma, N}, \Pi_{\rho}) \leq 4(1 + \|\bar{\mathbf{B}}_0^{-1} \mathbf{B}_0^{\top} \tilde{\mathbf{D}}_0^{1/2}\|^2) \frac{\max_{i \in [b]} \{m_i/\tilde{M}_i\}^2}{\min_{i \in [b]} \{m_i/\tilde{M}_i\}^2} \mathcal{R}^*(\gamma),$$

where setting  $\mathfrak{f}_i = m_i/(20\tilde{M}_i)$ ,

$$\mathcal{R}^*(\gamma) = \sum_{i=1}^b \left\{ d_i \gamma_i^2 \tilde{M}_i^2 + \frac{d_i \gamma_i^2 \mathfrak{f}_i}{\tilde{M}_i} \left( d_i L_i^2 + \frac{\tilde{M}_i^4}{\tilde{m}_i} \right) + d_i \gamma_i \tilde{M}_i \mathfrak{f}_i^3 (1 + \mathfrak{f}_i + \mathfrak{f}_i^2) \right\}, \quad (\text{S107})$$

$\bar{\mathbf{B}}_0, \mathbf{B}_0, \tilde{\mathbf{D}}_0$  are defined in (S2)-(S3), and for any  $i \in [b]$ ,  $\tilde{m}_i, \tilde{M}_i$  are defined in (S25).

We provide the proof of Proposition 5 in what follows. Similarly to Lemma S26 for the proof of Proposition 4, we derive an explicit relation between  $\|\tilde{Z}_{n+1} - Z_{n+1}\|$  and  $\|\tilde{Z}_n - Z_n\|$ .

**Lemma S34.** Assume **H1-H2-H3** and let  $N \in (\mathbb{N}^*)^b, \gamma \in (\mathbb{R}_+^*)^b$  such that for any  $i \in [b]$ ,  $N_i \gamma_i \leq 2/(m_i + \tilde{M}_i)$  and  $\gamma_i < 1/\tilde{M}_i$ . Then, for  $n \geq 1$ , we have

$$\mathbb{E} [\|\tilde{Z}_{n+1} - Z_{n+1}\|_{\mathbf{D}_{N\gamma}^{-1}}^2]^{1/2} \leq (1 - \min_{i \in [b]} \{N_i \gamma_i m_i\} + r_{\gamma, \rho, N}) \mathbb{E} [\|\tilde{Z}_n - Z_n\|_{\mathbf{D}_{N\gamma}^{-1}}^2]^{1/2} + \mathcal{R}(\gamma, N)^{1/2},$$

where

$$\begin{aligned} \mathcal{R}(\gamma, \mathbf{N}) = & \sum_{i=1}^b d_i N_i \gamma_i^3 (d_i L_i^2 + \tilde{M}_i^4 / \tilde{m}_i) + \sum_{i=1}^b \left( d_i \gamma_i^2 \tilde{M}_i^2 + d_i N_i^3 \gamma_i^4 \tilde{M}_i^4 \right) \\ & + \sum_{i=1}^b d_i N_i^4 \gamma_i^5 \tilde{M}_i^5 (1 + N_i \gamma_i \tilde{M}_i), \end{aligned} \quad (\text{S108})$$

$(\tilde{Z}_n, Z_n)_{n \in \mathbb{N}}$  is defined in (S79),  $r_{\gamma, \rho, \mathbf{N}}$  in (S33) and for any  $i \in [b]$ ,  $\tilde{m}_i$ ,  $\tilde{M}_i$  are defined in (S25).

*Proof.* Let  $n \in \mathbb{N}$ . For any  $k \in \mathbb{N}$ , recall that  $\mathbf{M}_k^{(n)}$  is defined in (S89) and invertible by Lemma S24. Define

$$w_n = \mathbf{D}_{\mathbf{N}\gamma}^{-1/2} (\tilde{Z}_n - Z_n).$$

Under this notation, the result given in Lemma S25 can be rewritten as

$$w_{n+1} = \mathbf{T}_1^{(n)} w_n - \mathbf{T}_2^{(n)},$$

where  $\mathbf{T}_1^{(n)}$  and  $\mathbf{T}_2^{(n)}$  are defined in (S91) and (S92), respectively. By the Minkowsky inequality and using (S81), we have

$$\mathbb{E}^{\mathcal{G}_n} [\|w_{n+1}\|^2]^{1/2} \leq \mathbb{E}^{\mathcal{G}_n} [\|\mathbf{T}_1^{(n)} w_n\|^2]^{1/2} + \mathbb{E}^{\mathcal{G}_n} [\|\mathbf{T}_2^{(n)}\|^2]^{1/2}. \quad (\text{S109})$$

Since by Lemma S27,

$$\|\mathbf{T}_1^{(n)}\| \leq 1 - \min_{i \in [b]} \{N_i \gamma_i m_i\} + r_{\gamma, \rho, \mathbf{N}}, \quad (\text{S110})$$

it remains to bound  $\mathbb{E}^{\mathcal{G}_n} [\|\mathbf{T}_2^{(n)}\|^2]$  to complete the proof.

For any  $i \in [b]$ , recall the function  $V_i^{\theta_n} : \mathbb{R}^{d_i} \rightarrow \mathbb{R}$  defined for any  $\mathbf{y}^i \in \mathbb{R}^{d_i}$  by  $V_i^{\theta_n}(\mathbf{y}^i) = U_i(\mathbf{y}^i) + \|\mathbf{y}^i - \mathbf{A}_i \theta_n\|^2 / (2\rho_i)$ . For any  $i \in [b]$ ,  $k \in \mathbb{N}$ , using the Itô formula, we have for  $l \in [k\gamma_i, (k+1)\gamma_i]$ ,

$$\begin{aligned} \nabla V_i(\tilde{Y}_{k\gamma_i+l}^{(i,n)}) - \nabla V_i(\tilde{Y}_{k\gamma_i}^{(i,n)}) = & \int_{k\gamma_i}^{k\gamma_i+l} \left\{ \nabla^2 V_i^{\theta_n}(\tilde{Y}_u^{(i,n)}) \nabla V_i^{\theta_n}(\tilde{Y}_u) + \vec{\Delta}(\nabla V_i^{\theta_n})(\tilde{Y}_u^{(i,n)}) \right\} du \\ & + \sqrt{2} \int_{k\gamma_i}^{k\gamma_i+l} \nabla^2 V_i^{\theta_n}(\tilde{Y}_u^{(i,n)}) dB_u^i. \end{aligned} \quad (\text{S111})$$

For any  $i \in [b]$ ,  $k \in \mathbb{N}$ , define

$$\begin{aligned} a_{1,k}^{(i,n)} &= \mathbb{1}_{[N_i]}(k+1) [\mathbf{M}_\infty^{(i,n)}]^{-1} \mathbf{M}_{k+1}^{(i,n)} \int_0^{\gamma_i} \int_{k\gamma_i}^{k\gamma_i+l} \nabla^2 V_i^{\theta_n}(\tilde{Y}_u^{(i,n)}) \nabla V_i^{\theta_n}(\tilde{Y}_u^{(i,n)}) du dl, \\ a_{2,k}^{(i,n)} &= \mathbb{1}_{[N_i]}(k+1) [\mathbf{M}_\infty^{(i,n)}]^{-1} \mathbf{M}_{k+1}^{(i,n)} \int_0^{\gamma_i} \int_{k\gamma_i}^{k\gamma_i+l} \vec{\Delta}(\nabla V_i^{\theta_n})(\tilde{Y}_u^{(i,n)}) du dl, \\ a_{3,k}^{(i,n)} &= \sqrt{2} \mathbb{1}_{[N_i]}(k+1) [\mathbf{M}_\infty^{(i,n)}]^{-1} \mathbf{M}_{k+1}^{(i,n)} \int_0^{\gamma_i} \int_{k\gamma_i}^{k\gamma_i+l} \nabla^2 V_i^{\theta_n}(\tilde{Y}_u^{(i,n)}) dB_u^i dl. \end{aligned}$$

With these notation and by (S111), we have

$$\begin{aligned} \|\mathbf{T}_2^{(n)}\|^2 &= \sum_{i \in [b]} \frac{1}{N_i \gamma_i} \left\| \sum_{k \in \mathbb{N}} \{a_{1,k}^{(i,n)} + a_{2,k}^{(i,n)} + a_{3,k}^{(i,n)}\} \right\|^2 \\ &\leq E_1 + E_2 + E_3, \end{aligned} \quad (\text{S112})$$

where for any  $j \in [3]$ ,  $E_j = 3 \sum_{i \in [b]} \|\sum_{k=0}^{N_i-1} a_{j,k}^{(i,n)}\|^2 / (N_i \gamma_i)$ . We now bound  $\{E_j\}_{j \in [3]}$ .

**Upper bound on  $E_1$ .** For any  $i \in [b], k \in \mathbb{N}$ , recall that we have  $[\mathbf{M}_\infty^{(i,n)}]^{-1} \mathbf{M}_{k+1}^{(i,n)} = \prod_{l=k+1}^\infty (\mathbf{I}_{d_i} + \mathbf{C}_l^{(i,n)})$  where  $\mathbf{C}_l^{(i,n)}$  is defined in (S88). In addition, since we suppose for any  $i \in [b]$ , that  $\gamma_i \tilde{M}_i < 1$ , Lemma S24 implies

$$\left\| \prod_{l=k+1}^{N_i-1} (\mathbf{I}_{d_i} - \mathbf{C}_l^{(i,n)}) \right\|^2 \leq \{1 - \gamma_i \tilde{m}_i\}^{2(N_i-k-1)}.$$

Combining this result with the Cauchy-Schwarz inequality, we obtain

$$\frac{1}{N_i} \left\| \sum_{k=0}^{N_i-1} a_{1,k}^{(i,n)} \right\|^2 \leq \sum_{k=0}^{N_i-1} \left\| \int_0^{\gamma_i} \int_{k\gamma_i}^{k\gamma_i+l} \nabla^2 V_i^{\theta_n}(\tilde{Y}_u^{(i,n)}) \nabla V_i^{\theta_n}(\tilde{Y}_u^{(i,n)}) du dl \right\|^2. \quad (\text{S113})$$

For  $i \in [b]$ , using the definition of  $\mathbf{z}_{n,\star}^i = \arg \min_{\mathbf{y}^i \in \mathbb{R}^{d_i}} V_i^{\theta_n}(\mathbf{y}^i) \in \mathbb{R}^{d_i}$ , we have  $\nabla V_i^{\theta_n}(\mathbf{z}_{n,\star}^i) = \mathbf{0}_{d_i}$ . Therefore, for  $i \in [b], k \in \mathbb{N}$ , conditioning with respect to  $\mathcal{F}_{k\gamma_i}^{(n)}$  defined in (S82) and using the  $\tilde{M}_i$ -Lipschitz property of  $V_i^{\theta_n}$  by H2 gives

$$\begin{aligned} \mathbb{E}^{\mathcal{F}_{k\gamma_i}^{(n)}} [\|\nabla^2 V_i^{\theta_n}(\tilde{Y}_u^{(i,n)}) \nabla V_i^{\theta_n}(\tilde{Y}_u^{(i,n)})\|^2] &\leq \tilde{M}_i^2 \mathbb{E}^{\mathcal{F}_{k\gamma_i}^{(n)}} [\|\nabla V_i^{\theta_n}(\tilde{Y}_u^{(i,n)}) - \nabla V_i^{\theta_n}(\mathbf{z}_{n,\star}^i)\|^2] \\ &\leq \tilde{M}_i^4 \mathbb{E}^{\mathcal{F}_{k\gamma_i}^{(n)}} [\|\tilde{Y}_u^{(i,n)} - \mathbf{z}_{n,\star}^i\|^2]. \end{aligned}$$

For any  $i \in [b], k \in \mathbb{N}$ , combining this result with the Jensen inequality yields

$$\begin{aligned} &\mathbb{E}^{\mathcal{F}_{k\gamma_i}^{(n)}} \left[ \left\| \int_0^{\gamma_i} \int_{k\gamma_i}^{k\gamma_i+l} \nabla^2 V_i^{\theta_n}(\tilde{Y}_u^{(i,n)}) \nabla V_i^{\theta_n}(\tilde{Y}_u^{(i,n)}) du dl \right\|^2 \right] \\ &\leq \gamma_i \int_0^{\gamma_i} l \int_{k\gamma_i}^{k\gamma_i+l} \mathbb{E}^{\mathcal{F}_{k\gamma_i}^{(n)}} [\|\nabla^2 V_i^{\theta_n}(\tilde{Y}_u^{(i,n)}) \nabla V_i^{\theta_n}(\tilde{Y}_u^{(i,n)})\|^2] du dl \\ &\leq \gamma_i \tilde{M}_i^4 \int_0^{\gamma_i} l \int_{k\gamma_i}^{k\gamma_i+l} \mathbb{E}^{\mathcal{F}_{k\gamma_i}^{(n)}} [\|\tilde{Y}_u^{(i,n)} - \mathbf{z}_{n,\star}^i\|^2] du dl. \end{aligned} \quad (\text{S114})$$

By Lemma S22, we have for any  $i \in [b], u \in \mathbb{R}_+$ ,

$$\mathbb{E}^{\mathcal{G}_n} [\|\tilde{Y}_u^{(i,n)} - \mathbf{z}_{n,\star}^i\|^2] \leq d_i / \tilde{m}_i. \quad (\text{S115})$$

Injecting this result in (S114) yields

$$\mathbb{E} \left[ \int_0^{\gamma_i} l \int_{k\gamma_i}^{k\gamma_i+l} \mathbb{E}^{\mathcal{F}_{k\gamma_i}^{(n)}} [\|\tilde{Y}_u^{(i,n)} - \mathbf{z}_{n,\star}^i\|^2] du dl \right] \leq d_i \gamma_i^3 / (3\tilde{m}_i).$$

Finally, this inequality, (S114) and (S113), we get

$$\mathbb{E}[E_1] \leq \sum_{i=1}^b d_i N_i \gamma_i^3 \tilde{M}_i^4 / \tilde{m}_i. \quad (\text{S116})$$

**Upper bound on  $E_2$ .** Using the Cauchy-Schwarz inequality, we have

$$\frac{1}{N_i} \left\| \sum_{k=0}^{N_i-1} a_{2,k}^{(i,n)} \right\|^2 \leq \sum_{k=0}^{N_i-1} \left\| \int_0^{\gamma_i} \int_{k\gamma_i}^{k\gamma_i+l} \vec{\Delta}(\nabla V_i^{\theta_n})(\tilde{Y}_u^{(i,n)}) du dl \right\|^2.$$

By H3, we have for any  $\mathbf{z}_i \in \mathbb{R}^{d_i}$ ,  $\|\vec{\Delta}(\nabla V_i^{\theta_n})(\mathbf{z}_i)\|^2 \leq d_i^2 L_i^2$ . Therefore, we obtain

$$\begin{aligned} \left\| \int_0^{\gamma_i} \int_{k\gamma_i}^{k\gamma_i+l} \vec{\Delta}(\nabla V_i^{\theta_n})(\tilde{Y}_u^{(i,n)}) du dl \right\|^2 &\leq \gamma_i \int_0^{\gamma_i} l \int_{k\gamma_i}^{k\gamma_i+l} \|\vec{\Delta}(\nabla V_i^{\theta_n})(\tilde{Y}_u^{(i,n)})\|^2 du dl \\ &\leq d_i^2 \gamma_i^4 L_i^2 / 3. \end{aligned}$$

Thus, we get

$$\mathbb{E}[E_2] \leq \sum_{i=1}^b d_i^2 N_i \gamma_i^3 L_i^2. \quad (\text{S117})$$

**Upper bound on  $E_3$ .** For any  $i \in [b], k \in \mathbb{N}$ , define

$$\Delta_{3,k}^{(i,n)} = \int_0^{\gamma_i} \int_{k\gamma_i}^{k\gamma_i+l} \nabla^2 V_i^{\theta_n}(\tilde{Y}_u^{(i,n)}) dB_u^i dl.$$

Using for any  $i \in [b], k \in \mathbb{N}$ ,  $[\mathbf{M}_\infty^{(i,n)}]^{-1} \mathbf{M}_{k+1}^{(i,n)} = \mathbf{I}_{d_i} - \sum_{l=k+1}^\infty \mathbf{C}_l^{(i,n)} + \mathbf{R}_k^{(i,n)}$  where  $\mathbf{R}_k^{(i,n)}$  is defined in (S34), we have, for any  $i \in [b], k \in \mathbb{N}$ ,

$$\begin{aligned} \left\| \sum_{k=0}^{N_i-1} a_{3,k}^{(i,n)} \right\|^2 &= \left\| \sqrt{2} \sum_{k=0}^{N_i-1} \prod_{l=k+1}^{N_i} [\mathbf{I}_{d_i} - \mathbf{C}_l^{(i,n)}] \Delta_{3,k}^{(i,n)} \right\|^2 \\ &= 2 \sum_{k_1, k_2=0}^{N_i-1} \langle \mathbf{R}_{k_1}^{(i,n)} \Delta_{3,k_1}^{(i,n)}, \mathbf{R}_{k_2}^{(i,n)} \Delta_{3,k_2}^{(i,n)} \rangle + 2 \sum_{k_1, k_2=0}^{N_i-1} \langle \Delta_{3,k_1}^{(i,n)}, \Delta_{3,k_2}^{(i,n)} \rangle \\ &\quad + 2 \sum_{k_1, k_2=0}^{N_i-1} \langle \sum_{l=k_1+1}^{N_i} \mathbf{C}_l^{(i,n)} \Delta_{3,k_1}^{(i,n)}, \sum_{l=k_2+1}^{N_i} \mathbf{C}_l^{(i,n)} \Delta_{3,k_2}^{(i,n)} \rangle \\ &\quad - 4 \sum_{k_1, k_2=0}^{N_i-1} \langle \sum_{l=k_1+1}^{N_i} \mathbf{C}_l^{(i,n)} \Delta_{3,k_1}^{(i,n)}, \Delta_{3,k_2}^{(i,n)} \rangle + 4 \sum_{k_1, k_2=0}^{N_i-1} \langle \mathbf{R}_{k_1}^{(i,n)} \Delta_{3,k_1}^{(i,n)}, \Delta_{3,k_2}^{(i,n)} \rangle \\ &\quad - 4 \sum_{k_1, k_2=0}^{N_i-1} \langle \mathbf{R}_{k_1}^{(i,n)} \Delta_{3,k_1}^{(i,n)}, \sum_{l=k_2+1}^{N_i} \mathbf{C}_l^{(i,n)} \Delta_{3,k_2}^{(i,n)} \rangle. \end{aligned} \quad (\text{S118})$$

We now control the quantities which appear in (S118). First, by **H2**, for any  $i \in [b], \mathbf{x}^i, \mathbf{y}^i \in \mathbb{R}^{d_i}$ , note that we have

$$\|\nabla^2 V_i^{\theta_n}(\mathbf{x}^i) \mathbf{y}^i\| \leq \tilde{M}_i \|\mathbf{y}^i\|.$$

By the Jensen inequality and the Itô isometry, for any  $k \in \mathbb{N}$ , we get

$$\begin{aligned} \mathbb{E}^{\mathcal{F}_{k\gamma_i}^{(n)}} [\|\Delta_{3,k}^{(i,n)}\|^2] &= \mathbb{E}^{\mathcal{F}_{k\gamma_i}^{(n)}} \left[ \left\| \int_0^{\gamma_i} \int_{k\gamma_i}^{k\gamma_i+l} \nabla^2 V_i^{\theta_n}(\tilde{Y}_u^{(i,n)}) dB_u^i dl \right\|^2 \right] \\ &\leq \gamma_i \tilde{M}_i^2 \int_0^{\gamma_i} \mathbb{E}^{\mathcal{F}_{k\gamma_i}^{(n)}} \left[ \left\| \int_{k\gamma_i}^{k\gamma_i+l} dB_u^i \right\|^2 \right] dl = d_i \gamma_i^3 \tilde{M}_i^2 / 2. \end{aligned} \quad (\text{S119})$$

In addition, since for  $i \in [b]$ ,  $(\int_0^t \nabla^2 V_i^{\theta_n}(\tilde{Y}_u^{(i,n)}) dB_u^i)_{t \geq 0}$  is a  $(\mathcal{F}_t^{(n)})_{t \geq 0}$ -martingale, for  $(k_1, k_2) \in \{0, \dots, N_i - 1\}^2$  such that  $k_1 < k_2$ , we obtain

$$\mathbb{E}^{\mathcal{G}_n} [\Delta_{3,k_1}^{(i,n)\top} \Delta_{3,k_2}^{(i,n)}] = \mathbb{E}^{\mathcal{G}_n} [\mathbb{E}^{\mathcal{F}_{k_2\gamma_i}^{(n)}} [\Delta_{3,k_1}^{(i,n)\top} \Delta_{3,k_2}^{(i,n)}]] = 0.$$

Therefore,

$$\sum_{k_1, k_2=0}^{N_i-1} \mathbb{E}^{\mathcal{G}_n} [\langle \Delta_{3,k_1}^{(i,n)}, \Delta_{3,k_2}^{(i,n)} \rangle] = d_i N_i \gamma_i^3 \tilde{M}_i^2 / 2.$$

Second, since for any  $i \in [b], l \in \mathbb{N}$ ,  $\mathbf{C}_l^{(i,n)} \in \mathbb{R}^{d_i \times d_i}$  is symmetric positive semi-definite, we have

$$\sum_{k_1, k_2=0}^{N_i-1} \langle \sum_{l=k_1+1}^{N_i} \mathbf{C}_l^{(i,n)} \Delta_{3,k_1}^{(i,n)}, \Delta_{3,k_2}^{(i,n)} \rangle = \left\langle \left\{ \sum_{l=1}^N C_l \right\} \sum_{k_1=0}^{l-1} \Delta_{3,k_1}, \sum_{k_1=0}^{l-1} \Delta_{3,k_1} \right\rangle \geq 0.$$

Third, using for any  $i \in [b], l \in \mathbb{N}$ , using  $\|\mathbf{C}_l^{(i,n)}\| \leq \gamma_i \tilde{M}_i$  by definition (S88) and **H2** and combining the Cauchy-Schwarz inequality with (S119), for any  $i \in [b], (k_1, k_2) \in \{0, \dots, N_i - 1\}^2$ , we get

$$\sum_{k_1, k_2=0}^{N_i-1} \mathbb{E}^{\mathcal{G}_n} \left[ \left\langle \sum_{l=k_1+1}^{N_i} \mathbf{C}_l^{(i,n)} \Delta_{3,k_1}^{(i,n)}, \sum_{l=k_2+1}^{N_i} \mathbf{C}_l^{(i,n)} \Delta_{3,k_2}^{(i,n)} \right\rangle \right] \leq d_i N_i^4 \gamma_i^5 \tilde{M}_i^4 / 8.$$



Using (S119) again and Lemma S8, for  $i \in [b]$ , we obtain

$$\begin{aligned}
 \sum_{k_1, k_2=0}^{N_i-1} \mathbb{E}^{\mathcal{G}_n} \left[ \langle \mathbf{R}_{k_1}^{(i,n)} \Delta_{3,k_1}^{(i,n)}, \mathbf{R}_{k_2}^{(i,n)} \Delta_{3,k_2}^{(i,n)} \rangle \right] &\leq (d_i \gamma_i^3 \tilde{M}_i^2 / 2) \sum_{k_1, k_2=0}^{N_i-1} \mathbb{E} \left[ \|\mathbf{R}_{k_1}^{(i,n)}\| \|\mathbf{R}_{k_2}^{(i,n)}\| \right] \\
 &\leq (d_i \gamma_i^3 \tilde{M}_i^2 / 2) \left\{ \sum_{k=0}^{N_i-1} (\exp[(N_i - k) \gamma_i \tilde{M}_i] - 1 - [(N_i - k) \gamma_i \tilde{M}_i]) \right\}^2 \\
 &\leq (d_i \gamma_i^3 \tilde{M}_i^2 / 2) \left\{ (\tilde{M}_i \gamma_i)^{-1} \int_0^{N_i \gamma_i \tilde{M}_i} \{e^t - 1 - t\} dt \right\}^2 \\
 &\leq \frac{(e^{N_i \gamma_i \tilde{M}_i} + 1)^2}{288} d_i N_i^6 \gamma_i^7 \tilde{M}_i^6.
 \end{aligned}$$

Similarly, we get Moreover, using the Cauchy-Schwarz inequality, for any  $i \in [b]$  we get

$$\begin{aligned}
 \sum_{k_1, k_2=0}^{N_i-1} \mathbb{E}[\langle \Delta_{k_1}^{(i,n)}, \mathbf{R}_{k_2}^{(i,n)} \Delta_{k_2}^{(i,n)} \rangle] &\leq \sum_{k_1, k_2=0}^{N_i-1} \mathbb{E} \left[ \|\Delta_{k_1}^{(i,n)}\| \|\Delta_{k_2}^{(i,n)}\| \|\mathbf{R}_{k_2}^{(i,n)}\| \right] \\
 &\leq \frac{d_i N_i \gamma_i^3 \tilde{M}_i^2}{24} (e^{N_i \gamma_i \tilde{M}_i} + 1) N_i^3 \gamma_i^2 \tilde{M}_i^2 \\
 &\leq d_i N_i^4 \gamma_i^5 \tilde{M}_i^4 \frac{e^{N_i \gamma_i \tilde{M}_i} + 1}{24}.
 \end{aligned}$$

In addition, for any  $i \in [b]$ , we have also

$$\sum_{k_1, k_2=0}^{N_i-1} \mathbb{E} \left[ \langle \mathbf{R}_{k_1}^{(i,n)} \Delta_{3,k_1}^{(i,n)}, \sum_{l=k_2+1}^{N_i} \mathbf{C}_l^{(i,n)} \Delta_{3,k_2}^{(i,n)} \rangle \right] \leq d_i N_i^5 \gamma_i^6 \tilde{M}_i^5 \frac{e^{N_i \gamma_i \tilde{M}_i} + 1}{24}. \quad (\text{S120})$$

For any  $i \in [b]$ ,  $k \in \mathbb{N}$ , regrouping the previous results and using that  $N_i \gamma_i \tilde{M}_i \leq 2$  give

$$\mathbb{E}[E_3] \leq \sum_{i=1}^b \{d_i N_i \gamma_i^2 \tilde{M}_i^2 + d_i N_i^3 \gamma_i^4 \tilde{M}_i^4\} + \sum_{i=1}^b d_i N_i^4 \gamma_i^5 \tilde{M}_i^5 (1 + N_i \gamma_i \tilde{M}_i). \quad (\text{S121})$$

**Combination of our previous results.** Injecting the three upper bounds (S116), (S117), (S121) in (S112), we get

$$\begin{aligned}
 \mathbb{E} \left[ \|T_2^{(n)}\|^2 \right] &\leq \sum_{i=1}^b d_i N_i \gamma_i^3 (d_i L_i^2 + \tilde{M}_i^4 / \tilde{m}_i) + \sum_{i=1}^b \{d_i \gamma_i^2 \tilde{M}_i^2 + d_i N_i^3 \gamma_i^4 \tilde{M}_i^4\} \\
 &\quad + \sum_{i=1}^b d_i N_i^4 \gamma_i^5 \tilde{M}_i^5 (1 + N_i \gamma_i \tilde{M}_i). \quad (\text{S122})
 \end{aligned}$$

Using the recursion defined in (S109), and combining the upper bounds derived in (S110) and (S122) completes the proof.  $\square$

**Lemma S35.** Assume **H1-H2-H3** and let  $\mathbf{N} \in (\mathbb{N}^*)^b, \gamma \in (\mathbb{R}_+^*)^b$  such that for any  $i \in [b]$ ,  $N_i \gamma_i \leq 2/(m_i + \tilde{M}_i)$ ,  $\gamma_i < 1/\tilde{M}_i$  and  $\kappa_{\gamma, \rho, \mathbf{N}} = \min_{i \in [b]} \{N_i \gamma_i m_i\} - r_{\gamma, \rho, \mathbf{N}} \in (0, 1)$ , where  $r_{\gamma, \rho, \mathbf{N}}$  is defined in (S33). Then, for  $n \geq 1$ , we have

$$\mathbb{E} \left[ \|\tilde{Z}_{n+1} - Z_{n+1}\|_{\mathbf{D}_{\mathbf{N}\gamma}^{-1}}^2 \right]^{1/2} \leq (1 - \kappa_{\gamma, \rho, \mathbf{N}})^{n-1} \mathbb{E} \left[ \|\tilde{Z}_1 - Z_1\|_{\mathbf{D}_{\mathbf{N}\gamma}^{-1}}^2 \right]^{1/2} + \{\kappa_{\gamma, \rho, \mathbf{N}}\}^{-1} \mathcal{R}(\gamma, \mathbf{N}),$$

where  $\mathcal{R}(\gamma, \mathbf{N})$  is given in (S108).

*Proof.* The proof follows from Lemma S34 combined with a straightforward induction.  $\square$

**Proof of Proposition 5/Proposition S33.**

*Proof of Proposition 5/Proposition S33.* For any  $i \in [b]$ , consider

$$N_i^*(\gamma_i) = \lfloor m_i \min_{i \in [b]} \{m_i / \tilde{M}_i\}^2 / (20\gamma_i \tilde{M}_i^2 \max_{i \in [b]} \{m_i / \tilde{M}_i\}^2) \rfloor.$$

By Proposition S13 and Lemma S28,  $P_{\rho, \gamma, N}$  converges in  $W_2$  to  $\Pi_{\rho, \gamma}$ . Therefore, using (S83), Lemma S23 and Lemma S35 and taking  $n \rightarrow +\infty$ , we obtain

$$W_2^2(\Pi_{\rho, \gamma, N}, \Pi_{\rho}) \leq 4(1 + \|\bar{\mathbf{B}}_0^{-1} \mathbf{B}_0^{\top} \tilde{\mathbf{D}}_0^{1/2}\|^2) \frac{\max_{i \in [b]} \{N_i^*(\gamma_i) \gamma_i\}}{\min_{i \in [b]} \{N_i^*(\gamma_i) \gamma_i m_i\}} \mathcal{R}(\gamma, \mathbf{N}^*(\gamma)). \quad (\text{S123})$$

By definition of  $N_i^*(\gamma_i)$ , we have  $\gamma_i \tilde{M}_i N_i^*(\gamma_i) \leq f_i = m_i / (20 \tilde{M}_i)$  which completes the proof upon using it in (S123).  $\square$

**S5. Explicit mixing times**

This section aims at providing mixing times for DG-LMC with explicit dependencies w.r.t. the dimension  $d$  and the prescribed precision  $\varepsilon$ . We specify our result to the case where for any  $i \in [b]$ ,  $m_i = m$ ,  $M_i = M$ ,  $L_i = L$ ,  $\rho_i = \rho$ ,  $\gamma_i = \gamma$ ,  $N_i = N$  and for the specific initial distribution

$$\mu_{\rho}^* = \delta_{\mathbf{z}^*} \otimes \Pi_{\rho}(\cdot | \mathbf{z}^*), \quad (\text{S124})$$

where

$$\mathbf{x}^* = ([\boldsymbol{\theta}^*]^{\top}, [\mathbf{z}^*]^{\top})^{\top}, \text{ where } \boldsymbol{\theta}^* = \arg \min \{-\log \pi\} \text{ and } \mathbf{z}^* = ([\mathbf{A}_1 \boldsymbol{\theta}^*]^{\top}, \dots, [\mathbf{A}_b \boldsymbol{\theta}^*]^{\top})^{\top}. \quad (\text{S125})$$

Note that sampling from  $\mu_{\rho}^*$  is straightforward and simply consists in setting  $\mathbf{z}_0 = \mathbf{z}^*$  and  $\boldsymbol{\theta}_0 = \bar{\mathbf{B}}_0^{-1} \mathbf{B}_0^{\top} \tilde{\mathbf{D}}_0^{1/2} \mathbf{z}_0 + \bar{\mathbf{B}}_0^{-1/2} \xi$ , where  $\xi$  is a  $d$ -dimensional standard Gaussian random variable. Starting from this initialisation, we consider the marginal law of  $\theta_n$  for  $n \geq 1$  and denote it  $\Gamma_{\mathbf{x}^*}^n$ . By Proposition S13, since for any  $i \in [b]$ ,  $N_i = N$ , the stationary distribution associated to  $P_{\rho, \gamma, N}$  is  $\Pi_{\rho, \gamma} = \Pi_{\rho, \gamma, \mathbf{1}_b}$ . We build upon the natural decomposition of the bias:

$$W_2(\Gamma_{\mathbf{x}^*}^n, \pi) \leq W_2(\mu_{\rho}^* P_{\rho, \gamma, N}^n, \Pi_{\rho, \gamma}) + W_2(\Pi_{\rho, \gamma}, \Pi_{\rho}) + W_2(\pi_{\rho}, \pi),$$

where  $\Pi_{\rho, \gamma}$ ,  $\Pi_{\rho}$  and  $\pi_{\rho}$  are defined in Proposition 2, (2) and (3), respectively. The following subsections focus on deriving conditions on  $n_{\varepsilon}$ ,  $\gamma_{\varepsilon}$ ,  $N_{\varepsilon}$  and  $\rho_{\varepsilon}$  to satisfy  $W_2(\Gamma_{\mathbf{x}^*}^{n_{\varepsilon}}, \pi) \leq \varepsilon$ , where  $\varepsilon > 0$ .

**S5.1. Lower bound on the number of iterations  $n_{\varepsilon}$** 

In this section, we derive a lower bound on  $n_{\varepsilon}$  such that  $W_2(\mu_{\rho}^* P_{\rho, \gamma, N}^{n_{\varepsilon}}, \Pi_{\rho, \gamma}) \leq \varepsilon/3$  following the result provided in Proposition S14. Recall that we define the  $\mathbf{z}$ -marginal under  $\Pi_{\rho, \gamma}$  by

$$\pi_{\rho, \gamma}^{\mathbf{z}} = \int_{\mathbb{R}^d} \Pi_{\rho, \gamma}(\boldsymbol{\theta}, \mathbf{z}) d\boldsymbol{\theta}, \quad (\text{S126})$$

and the transition kernel of the Markov chain  $\{Z_n\}_{n \geq 0}$ , for all  $\mathbf{z} \in \mathbb{R}^p$  and  $\mathbf{B} \in \mathcal{B}(\mathbb{R}^p)$ , by

$$P_{\rho, \gamma, N}^{\mathbf{z}}(\mathbf{z}, \mathbf{B}) = \int_{\mathbb{R}^d} Q_{\rho, \gamma, N}(\mathbf{z}, \mathbf{B} | \boldsymbol{\theta}) \Pi_{\rho}(\boldsymbol{\theta} | \mathbf{z}) d\boldsymbol{\theta}, \quad (\text{S127})$$

where  $\Pi_{\rho}(\cdot | \mathbf{z})$  and  $Q_{\rho, \gamma, N}$  are defined in (5) and (S16), respectively. In the case  $N = \mathbf{1}_b$ , we simply denote  $P_{\rho, \gamma, N}^{\mathbf{z}}$  by  $P_{\rho, \gamma}^{\mathbf{z}}$ . We need to bound in Proposition S14 the factor

$$\left\{ \int_{\mathbb{R}^d} \|\mathbf{z}_1 - \mathbf{z}^*\|_{\mathbf{D}_{N\gamma}^{-1}}^2 \pi_{\rho, \gamma}^{\mathbf{z}}(d\mathbf{z}_1) + \int_{\mathbb{R}^d} \|\mathbf{z}_1 - \mathbf{z}^*\|_{\mathbf{D}_{N\gamma}^{-1}}^2 P_{\rho, \gamma, N}^{\mathbf{z}}(\mathbf{z}^*, d\mathbf{z}_1) \right\}^{1/2}. \quad (\text{S128})$$

Our next results provide such bounds.

**Lemma S36.** Assume H1. Then, the transition kernel  $P_{\rho, \gamma}^{\mathbf{z}}$  leaves  $\pi_{\rho, \gamma}^{\mathbf{z}}$  invariant, that is  $\pi_{\rho, \gamma}^{\mathbf{z}} P_{\rho, \gamma}^{\mathbf{z}} = \pi_{\rho, \gamma}^{\mathbf{z}}$ , where  $\pi_{\rho, \gamma}^{\mathbf{z}}$  is defined by (S50).

*Proof.* We have for any  $B \in \mathcal{B}(\mathbb{R}^p)$

$$\int_B \pi_{\rho, \gamma}^{\mathbf{z}}(d\mathbf{z}) = \int_B \int_{\mathbb{R}^d} \Pi_{\rho, \gamma}(d\boldsymbol{\theta}, d\mathbf{z}) = \int_B \pi_{\rho, \gamma}^{\mathbf{z}}(d\mathbf{z}) \int_{\mathbb{R}^d} \Pi_{\rho, \gamma}(d\boldsymbol{\theta}|\mathbf{z}) .$$

Therefore, using the fact that  $P_{\rho, \gamma}$  leaves  $\Pi_{\rho, \gamma}$  invariant from Proposition S5 and Fubini's theorem, we get

$$\begin{aligned} \int_B \pi_{\rho, \gamma}^{\mathbf{z}}(d\mathbf{z}) &= \int_B \int_{\mathbb{R}^d} \Pi_{\rho, \gamma}(d\boldsymbol{\theta}, d\mathbf{z}) = \int_B \int_{\mathbb{R}^d} \int_{\mathbb{R}^d \times \mathbb{R}^p} \Pi_{\rho, \gamma}(d\tilde{\boldsymbol{\theta}}, d\tilde{\mathbf{z}}) P_{\rho, \gamma}((\tilde{\boldsymbol{\theta}}, \tilde{\mathbf{z}}), (d\boldsymbol{\theta}, d\mathbf{z})) \\ &= \int_B \int_{\mathbb{R}^d} \int_{\mathbb{R}^d \times \mathbb{R}^p} \Pi_{\rho, \gamma}(d\tilde{\boldsymbol{\theta}}, d\tilde{\mathbf{z}}) Q_{\rho, \gamma}(\tilde{\mathbf{z}}, d\mathbf{z}|\tilde{\boldsymbol{\theta}}) \Pi_{\rho}(\boldsymbol{\theta}|\mathbf{z}) d\boldsymbol{\theta} \\ &= \int_B \int_{\mathbb{R}^d \times \mathbb{R}^p} \Pi_{\rho, \gamma}(d\tilde{\boldsymbol{\theta}}, d\tilde{\mathbf{z}}) Q_{\rho, \gamma}(\tilde{\mathbf{z}}, d\mathbf{z}|\tilde{\boldsymbol{\theta}}) \int_{\mathbb{R}^d} \Pi_{\rho}(\boldsymbol{\theta}|\mathbf{z}) d\boldsymbol{\theta} \\ &= \int_{\mathbb{R}^d} \pi_{\rho, \gamma}^{\mathbf{z}}(d\tilde{\mathbf{z}}) P_{\rho, \gamma}^{\mathbf{z}}(\tilde{\mathbf{z}}, B) . \end{aligned} \quad (\text{S129})$$

□

For any  $i \in [b]$ , let  $\boldsymbol{\theta}_i^*$  a minimiser of  $\boldsymbol{\theta} \mapsto U_i(\mathbf{A}_i \boldsymbol{\theta})$ , and define

$$\mathbf{u}^* = ([\mathbf{A}_1(\boldsymbol{\theta}^* - \boldsymbol{\theta}_1^*)]^\top, \dots, [\mathbf{A}_b(\boldsymbol{\theta}^* - \boldsymbol{\theta}_b^*)]^\top)^\top \quad (\text{S130})$$

**Lemma S37.** Assume H1-H2 and let  $\mathbf{N} \in (\mathbb{N}^*)^b$ ,  $\gamma, \rho \in (\mathbb{R}_+^*)^b$  such that, for any  $i \in [b]$ ,  $\gamma_i \leq 2/(m_i + M_i + 1/\rho_i)$  and denote  $\mathbf{z}^* = ([\mathbf{A}_1 \boldsymbol{\theta}^*]^\top, \dots, [\mathbf{A}_b \boldsymbol{\theta}^*]^\top)^\top$ . Then, for any  $\mathbf{z} \in \mathbb{R}^p$  and  $\varepsilon > 0$ ,

$$\begin{aligned} \int_{\mathbb{R}^p} \|\tilde{\mathbf{z}} - \mathbf{z}^*\|_{\mathbf{D}_{\mathbf{N}}^{-1}}^2 P_{\rho, \gamma}^{\mathbf{z}}(\mathbf{z}, d\tilde{\mathbf{z}}) &\leq \min_{i \in [b]} \{N_i\}^{-1} \left[ \kappa_\gamma^2 (1 + 2\varepsilon) \|\mathbf{z} - \mathbf{z}^*\|_{\mathbf{D}_\gamma^{-1}}^2 \right. \\ &\quad \left. + (1 + 1/(2\varepsilon)) \max_{i \in [b]} \{\gamma_i M_i^2\} \|\mathbf{u}^*\|^2 + \text{Tr}(\mathbf{D}_{\gamma/\rho} \mathbf{P}_0) + 2 \sum_{i=1}^b d_i \right] , \end{aligned}$$

where the transition kernel  $P_{\rho, \gamma}^{\mathbf{z}}$  is defined in (S51) with  $\mathbf{N} = \mathbf{1}_b$ .

*Proof.* Let  $\gamma_i \leq 2/(m_i + M_i + 1/\rho_i)$  for any  $i \in [b]$ . Let  $\xi$  be a  $d$ -dimensional Gaussian random variable independent of  $\{\eta^i : i \in [b]\}$  where for any  $i \in [b]$ ,  $\eta^i$  is a  $d_i$ -dimensional Gaussian random variable. Let  $\mathbf{z} \in \mathbb{R}^p$  and  $Z$  be the random variable distributed according to  $\delta_{\mathbf{z}} P_{\rho, \gamma}^{\mathbf{z}}$ , and defined by

$$\theta = \bar{\mathbf{B}}_0^{-1} \mathbf{B}_0^\top \tilde{\mathbf{D}}_0^{1/2} \mathbf{z} + \bar{\mathbf{B}}_0^{-1/2} \xi ,$$

and for any  $i \in [b]$ ,

$$\begin{aligned} Z^i &= (1 - \gamma_i/\rho_i) \mathbf{z}_i - \gamma_i \nabla U_i(\mathbf{z}_i) + \frac{\gamma_i}{\rho_i} \mathbf{A}_i \theta + \sqrt{2\gamma_i} \eta^i \\ &= (1 - \gamma_i/\rho_i) \mathbf{z}_i - \gamma_i \nabla U_i(\mathbf{z}_i) + \frac{\gamma_i}{\rho_i} \mathbf{A}_i \bar{\mathbf{B}}_0^{-1} \mathbf{B}_0^\top \tilde{\mathbf{D}}_0^{1/2} \mathbf{z} + \frac{\gamma_i}{\rho_i} \mathbf{A}_i \bar{\mathbf{B}}_0^{-1/2} \xi + \sqrt{2\gamma_i} \eta^i \\ &= (1 - \gamma_i/\rho_i) \mathbf{z}_i - \gamma_i [\nabla U_i(\mathbf{z}_i) - \nabla U_i(\mathbf{A}_i \boldsymbol{\theta}^*)] - \gamma_i [\nabla U_i(\mathbf{A}_i \boldsymbol{\theta}^*) - \nabla U_i(\mathbf{A}_i \boldsymbol{\theta}_i^*)] \\ &\quad + \frac{\gamma_i}{\rho_i} \mathbf{A}_i \bar{\mathbf{B}}_0^{-1} \mathbf{B}_0^\top \tilde{\mathbf{D}}_0^{1/2} \mathbf{z} + \frac{\gamma_i}{\rho_i} \mathbf{A}_i \bar{\mathbf{B}}_0^{-1/2} \xi + \sqrt{2\gamma_i} \eta^i . \end{aligned}$$

Let

$$\begin{aligned} \mathbf{D}_U^* &= \text{diag} \left( \gamma_1 \int_0^1 \nabla^2 U_1(\mathbf{z}_1 + t(\mathbf{A}_1 \boldsymbol{\theta}^* - \mathbf{z}_1)) dt, \dots, \gamma_b \int_0^1 \nabla^2 U_b(\mathbf{z}_b + t(\mathbf{A}_b \boldsymbol{\theta}^* - \mathbf{z}_b)) dt \right) , \\ \tilde{\mathbf{D}}_U^* &= \text{diag} \left( \gamma_1 \int_0^1 \nabla^2 U_1(\mathbf{A}_1 \boldsymbol{\theta}^* + t(\mathbf{A}_1 \boldsymbol{\theta}_1^* - \mathbf{A}_1 \boldsymbol{\theta}^*)) dt, \dots, \gamma_b \int_0^1 \nabla^2 U_b(\mathbf{A}_b \boldsymbol{\theta}^* + t(\mathbf{A}_b \boldsymbol{\theta}_b^* - \mathbf{A}_b \boldsymbol{\theta}^*)) dt \right) . \end{aligned} \quad (\text{S131})$$

Since  $\mathbf{P}_0 \mathbf{D}_\rho^{-1/2} \mathbf{z}^* = \mathbf{D}_\rho^{-1/2} \mathbf{z}^*$ , it follows that

$$\mathbf{Z} - \mathbf{z}^* = \left[ \mathbf{I}_p - \mathbf{D}_U^* - \mathbf{D}_\gamma^{1/2} \mathbf{D}_{\gamma/\rho}^{1/2} (\mathbf{I}_p - \mathbf{P}_0) \mathbf{D}_\rho^{-1/2} \right] (\mathbf{z} - \mathbf{z}^*) - \tilde{\mathbf{D}}_U^* \mathbf{u}^* + \mathbf{D}_\gamma^{1/2} \mathbf{D}_{\gamma/\rho}^{1/2} \mathbf{B}_0 \bar{\mathbf{B}}_0^{-1/2} \xi + \mathbf{D}_{2\gamma}^{1/2} \eta.$$

With the notation  $\mathbf{H} = \mathbf{I}_p - \mathbf{D}_U^* - \mathbf{D}_\gamma^{1/2} \mathbf{D}_{\gamma/\rho}^{1/2} (\mathbf{I}_p - \mathbf{P}_0) \mathbf{D}_\rho^{-1/2}$ , (S14), and using the fact that for any  $\varepsilon > 0$ ,  $\mathbf{a}, \mathbf{b} \in \mathbb{R}^d$ ,  $|\langle \mathbf{a}, \mathbf{b} \rangle| \leq \varepsilon \|\mathbf{a}\|^2 + (4\varepsilon)^{-1} \|\mathbf{b}\|^2$ , it follows, for any  $\mathbf{z} \in \mathbb{R}^p$ , that

$$\begin{aligned} & \int_{\mathbb{R}^p} \|\tilde{\mathbf{z}} - \mathbf{z}^*\|_{\mathbf{D}_\gamma^{-1}}^2 P_{\rho, \gamma}^{\mathbf{z}}(\mathbf{z}, d\tilde{\mathbf{z}}) \\ &= \int_{\mathbb{R}^p} \int_{\mathbb{R}^d} \|\mathbf{H}(\mathbf{z} - \mathbf{z}^*) - \tilde{\mathbf{D}}_U^* \mathbf{u}^* + \mathbf{D}_\gamma^{1/2} \mathbf{D}_{\gamma/\rho}^{1/2} \mathbf{B}_0 \bar{\mathbf{B}}_0^{-1/2} \xi + \mathbf{D}_{2\gamma}^{1/2} \eta\|_{\mathbf{D}_\gamma^{-1}}^2 \phi_d(\xi) d\xi \phi_p(\eta) d\eta \\ &= \|\mathbf{H}(\mathbf{z} - \mathbf{z}^*) - \tilde{\mathbf{D}}_U^* \mathbf{u}^*\|_{\mathbf{D}_\gamma^{-1}}^2 + \text{Tr}(\mathbf{D}_{\gamma/\rho} \mathbf{P}_0) + 2 \sum_{i=1}^b d_i \\ &\leq \kappa_\gamma^2 \|\mathbf{z} - \mathbf{z}^*\|_{\mathbf{D}_\gamma^{-1}}^2 - 2 \langle \mathbf{H}(\mathbf{z} - \mathbf{z}^*), \tilde{\mathbf{D}}_U^* \mathbf{u}^* \rangle_{\mathbf{D}_\gamma^{-1}} + \|\tilde{\mathbf{D}}_U^* \mathbf{u}^*\|_{\mathbf{D}_\gamma^{-1}}^2 + \text{Tr}(\mathbf{D}_{\gamma/\rho} \mathbf{P}_0) + 2 \sum_{i=1}^b d_i \\ &\leq \kappa_\gamma^2 (1 + 2\varepsilon) \|\mathbf{z} - \mathbf{z}^*\|_{\mathbf{D}_\gamma^{-1}}^2 + \left(1 + \frac{1}{2\varepsilon}\right) \max_{i \in [b]} \{\gamma_i M_i^2\} \|\mathbf{u}^*\|^2 + \text{Tr}(\mathbf{D}_{\gamma/\rho} \mathbf{P}_0) + 2 \sum_{i=1}^b d_i. \end{aligned}$$

□

**Proposition S38.** Assume **H1-H2** and let  $\mathbf{N} \in (\mathbb{N}^*)^b, \gamma, \rho \in (\mathbb{R}_+^*)^b$  such that, for any  $i \in [b]$ ,  $\gamma_i \leq 2/(m_i + M_i + 1/\rho_i)$ . Then, we have

$$\begin{aligned} & \int_{\mathbb{R}^d} \|\mathbf{z}_1 - \mathbf{z}^*\|_{\mathbf{D}_{N\gamma}^{-1}}^2 \pi_{\rho, \gamma}^{\mathbf{z}}(d\mathbf{z}_1) \\ & \leq \min_{i \in [b]} \{N_i\}^{-1} \frac{2}{1 - \kappa_\gamma^2} \left( \frac{1 + \kappa_\gamma^2}{1 - \kappa_\gamma^2} \max_{i \in [b]} \{\gamma_i M_i^2\} \|\mathbf{u}^*\|^2 + \text{Tr}(\mathbf{D}_{\gamma/\rho} \mathbf{P}_0) + 2 \sum_{i=1}^b d_i \right), \end{aligned}$$

with  $\kappa_\gamma$  defined in (S12).

*Proof.* With the choice  $\varepsilon = (1 - \kappa_\gamma^2)/(4\kappa_\gamma^2)$  in Lemma S37 and using Lemma S36, we have

$$\begin{aligned} & \int_{\mathbb{R}^p} \|\tilde{\mathbf{z}} - \mathbf{z}^*\|_{\mathbf{D}_\gamma^{-1}}^2 \pi_{\rho, \gamma}^{\mathbf{z}}(d\tilde{\mathbf{z}}) \leq \frac{\kappa_\gamma^2 + 1}{2} \int_{\mathbb{R}^p} \|\mathbf{z} - \mathbf{z}^*\|_{\mathbf{D}_\gamma^{-1}}^2 \pi_{\rho, \gamma}^{\mathbf{z}}(d\mathbf{z}) + \frac{1 + \kappa_\gamma^2}{1 - \kappa_\gamma^2} \max_{i \in [b]} \{\gamma_i M_i^2\} \|\mathbf{u}^*\|^2 \\ & + \text{Tr}(\mathbf{D}_{\gamma/\rho} \mathbf{P}_0) + 2 \sum_{i=1}^b d_i. \end{aligned}$$

Rearranging terms concludes the proof. □

**Lemma S39.** Assume **H1-H2** and let  $\mathbf{N} \in (\mathbb{N}^*)^b, \gamma, \rho \in (\mathbb{R}_+^*)^b$  such that, for any  $i \in [b]$ ,  $N_i \gamma_i \leq 2/(m_i + M_i + 1/\rho_i)$ ,  $\gamma_i \tilde{M}_i < 1$  and denote  $\mathbf{z}^* = ([\mathbf{A}_1 \theta^*]^\top, \dots, [\mathbf{A}_b \theta^*]^\top)^\top$ . Then, we have

$$\int_{\mathbb{R}^p} \|\tilde{\mathbf{z}} - \mathbf{z}^*\|_{\mathbf{D}_{N\gamma}^{-1}}^2 P_{\rho, \gamma, N}^{\mathbf{z}}(\mathbf{z}^*, d\tilde{\mathbf{z}}) \leq 2 \sum_{i=1}^b \gamma_i N_i (1 + \text{Tr}(\mathbf{P}_0)/\rho_i) + 4 \sum_{i=1}^b d_i.$$

where the transition kernel  $P_{\rho, \gamma, N}^{\mathbf{z}}$  is defined in (S51).

*Proof.* Let  $\{(\eta_k^i)_{k \geq 1} : i \in [b]\}$  be independent random variables such that for any  $i \in [b]$ , the sequences  $\{(\eta_k^i)_{k \geq 1}\}$  are i.i.d.  $d_i$ -dimensional Brownian motions and let  $\xi$  a  $d$ -dimensional standard Gaussian random variable independent of

$\{(\eta_k^i)_{k \geq 1} : i \in [b]\}$ . Consider the stochastic process  $(Y_k)_{k \in \mathbb{N}}$  initialised for any  $i \in [b]$  at  $Y_0^i = \mathbf{A}_i \boldsymbol{\theta}^*$  and defined, for any  $i \in [b], k \in \mathbb{N}$ , by

$$Y_{k+1}^i = Y_k^i - \gamma_i \nabla V_i(Y_k^i) + (\gamma_i / \rho_i) \mathbf{A}_i \boldsymbol{\theta} + \sqrt{2\gamma_i} \eta_{k+1}^i, \quad (\text{S132})$$

where the potential  $V_i = \mathbf{y}^i \mapsto U_i(\mathbf{y}^i) + \|\mathbf{y}^i\|^2 / (2\rho_i)$  and

$$\boldsymbol{\theta} = \bar{\mathbf{B}}_0^{-1} \mathbf{B}_0^\top \tilde{\mathbf{D}}_0^{1/2} \mathbf{z}^* + \bar{\mathbf{B}}_0^{-1/2} \boldsymbol{\xi}. \quad (\text{S133})$$

In addition, we define the random variable  $Z = (Z^1, \dots, Z^b)$ , for any  $i \in [b]$ , as

$$Z^i = Y_{N_i}^i.$$

By definition, note that  $Z$  is distributed according to  $P_{\rho, \gamma, N}^{\mathbf{z}}(\mathbf{z}^*, \cdot)$ . Define the process  $(Y_k = \{Y_k^i\}_{i=1}^b)_{k \in \mathbb{N}}$  valued in  $\mathbb{R}^p \times \mathbb{R}^p$  defined for any  $i \in [b], k \geq 0$  by

$$Y_k^i = Y_{\min(k, N_i)}^i.$$

and consider the following matrices defined, for any  $k \in \mathbb{N}$ , by

$$\begin{aligned} \mathbf{H}_{U,k} &= \text{diag} \left( \gamma_1 \int_0^1 \nabla^2 U_1((1-s)Y_k^1 + s\mathbf{z}^*) ds, \right. \\ &\quad \left. \dots, \gamma_b \int_0^1 \nabla^2 U_b((1-s)Y_k^b + s\mathbf{z}^*) ds \right), \\ \mathbf{J}(k) &= \text{diag} \left( \mathbb{1}_{[N_1]}(k+1) \cdot \mathbf{I}_{d_1}, \dots, \mathbb{1}_{[N_b]}(k+1) \cdot \mathbf{I}_{d_b} \right), \end{aligned} \quad (\text{S134})$$

$$\mathbf{C}_k = \mathbf{J}(k)(\mathbf{D}_{\gamma/\rho} + \mathbf{H}_{U,k}), \quad (\text{S135})$$

$$\mathbf{M}_{k+1} = (\mathbf{I}_p - \mathbf{C}_0)^{-1} \dots (\mathbf{I}_p - \mathbf{C}_k)^{-1}, \quad \text{with } \mathbf{M}_0 = \mathbf{I}_p. \quad (\text{S136})$$

Using these notation and (S132), for any  $k \in \mathbb{N}$ , we get

$$Y_{k+1} - \mathbf{z}^* = (\mathbf{I}_p - \mathbf{C}_k)(Y_k - \mathbf{z}^*) + \mathbf{J}(k) \left( \mathbf{D}_{\gamma/\sqrt{\rho}} \mathbf{B}_0 \boldsymbol{\theta} - \mathbf{D}_{\gamma} \nabla V(\mathbf{z}^*) + \mathbf{D}_{2\gamma}^{1/2} \eta_{k+1} \right).$$

Multiplying the previous equality by  $\mathbf{M}_{k+1} \mathbf{D}_{N\gamma}^{-1/2}$ , we obtain, for  $k \geq 0$ ,

$$\begin{aligned} \mathbf{M}_{k+1} \mathbf{D}_{N\gamma}^{-1/2} (Y_{k+1} - \mathbf{z}^*) &= \mathbf{M}_k \mathbf{D}_{N\gamma}^{-1/2} (Y_k - \mathbf{z}^*) \\ &\quad + \mathbf{M}_{k+1} \mathbf{J}(k) \mathbf{D}_{N\gamma}^{-1/2} \left( \mathbf{D}_{\gamma/\sqrt{\rho}} \mathbf{B}_0 \boldsymbol{\theta} - \mathbf{D}_{\gamma} \nabla V(\mathbf{z}^*) + \mathbf{D}_{2\gamma}^{1/2} \eta_{k+1} \right). \end{aligned}$$

Summing the previous equality over  $k \in \mathbb{N}$  gives

$$\begin{aligned} \mathbf{M}_{\infty} \mathbf{D}_{N\gamma}^{-1/2} (Y_N - \mathbf{z}^*) &= \mathbf{M}_0 \mathbf{D}_{N\gamma}^{-1/2} (Y_0 - \mathbf{z}^*) \\ &\quad + \sum_{k=0}^{\infty} \mathbf{M}_{k+1} \mathbf{J}(k) \mathbf{D}_{N\gamma}^{-1/2} \left( \mathbf{D}_{\gamma/\sqrt{\rho}} \mathbf{B}_0 \boldsymbol{\theta} - \mathbf{D}_{\gamma} \nabla V(\mathbf{z}^*) + \mathbf{D}_{2\gamma}^{1/2} \eta_{k+1} \right). \end{aligned}$$

Multiplying the last equality by  $[\mathbf{M}_{\infty}]^{-1}$  and using the fact that  $Y_0 = \mathbf{z}^*$ , we get

$$\mathbf{D}_{N\gamma}^{-1/2} (Z - \mathbf{z}^*) = \sum_{k=0}^{\infty} [\mathbf{M}_{\infty}]^{-1} \mathbf{M}_{k+1} \mathbf{J}(k) \mathbf{D}_{N\gamma}^{-1/2} \left( \mathbf{D}_{\gamma/\sqrt{\rho}} \mathbf{B}_0 \boldsymbol{\theta} - \mathbf{D}_{\gamma} \nabla V(\mathbf{z}^*) + \mathbf{D}_{2\gamma}^{1/2} \eta_{k+1} \right). \quad (\text{S137})$$

Recall that  $\mathbf{P}_0 = \mathbf{B}_0 \bar{\mathbf{B}}_0^{-1} \mathbf{B}_0^\top$ . Hence, by (S133) and using  $\mathbf{P}_0 \mathbf{D}_{\rho}^{-1/2} \mathbf{z}^* = \mathbf{D}_{\rho}^{-1/2} \mathbf{z}^*$ , we get

$$\mathbf{D}_{\gamma/\sqrt{\rho}} \mathbf{B}_0 \boldsymbol{\theta} - \mathbf{D}_{\gamma} \nabla V(\mathbf{z}^*) = \mathbf{D}_{\gamma/\sqrt{\rho}} \mathbf{B}_0 \bar{\mathbf{B}}_0^{-1/2} \boldsymbol{\xi} - \mathbf{D}_{\gamma} \nabla U(\mathbf{z}^*).$$

Plugging this equality into (S137) yields

$$\begin{aligned}
 \mathbf{D}_{N\gamma}^{-1/2}(Z - \mathbf{z}^*) &= - \sum_{k=0}^{\infty} [\mathbf{M}_{\infty}]^{-1} \mathbf{M}_{k+1} \mathbf{J}(k) \mathbf{D}_{\gamma/N}^{1/2} \nabla U(\mathbf{z}^*) \\
 &\quad + \sum_{k=0}^{\infty} [\mathbf{M}_{\infty}]^{-1} \mathbf{M}_{k+1} \mathbf{J}(k) \mathbf{D}_{\gamma/(N\rho)}^{1/2} \mathbf{B}_0 \bar{\mathbf{B}}_0^{-1/2} \xi \\
 &\quad + \sqrt{2} \sum_{k=0}^{\infty} [\mathbf{M}_{\infty}]^{-1} \mathbf{M}_{k+1} \mathbf{J}(k) \mathbf{D}_N^{-1/2} \eta_{k+1} .
 \end{aligned} \tag{S138}$$

Recall that  $[\mathbf{M}_{\infty}]^{-1} \mathbf{M}_{k+1} = (([\mathbf{M}_{\infty}]^{-1} \mathbf{M}_{k+1})^1, \dots, ([\mathbf{M}_{\infty}]^{-1} \mathbf{M}_{k+1})^b)$  is a block-diagonal matrix where, for any  $i \in [b]$ ,  $([\mathbf{M}_{\infty}]^{-1} \mathbf{M}_{k+1})^i = \prod_{l=k+1}^{\infty} (\mathbf{I}_{d_i} - \mathbf{C}_l^i)$  where  $\mathbf{C}_l^i$  is defined in (S135). In addition, since we suppose for any  $i \in [b]$ , that  $\gamma_i \tilde{M}_i < 1$ , Lemma S24 implies

$$\left\| \prod_{l=k+1}^{N_i-1} (\mathbf{I}_{d_i} - \mathbf{C}_l^i) \right\|^2 \leq (1 - \gamma_i \tilde{m}_i)^{2(N_i-k-1)} .$$

We now upper bound separately each term on the right-hand side of (S138). First, using the Cauchy-Schwarz inequality, we have

$$\begin{aligned}
 \left\| \sum_{k=0}^{\infty} [\mathbf{M}_{\infty}]^{-1} \mathbf{M}_{k+1} \mathbf{J}(k) \mathbf{D}_{\gamma/N}^{1/2} \right\|^2 &\leq \sum_{i=1}^b (\gamma_i/N_i) \left\| \sum_{k=0}^{\infty} ([\mathbf{M}_{\infty}]^{-1} \mathbf{M}_{k+1})^i \mathbf{J}^i(k) \right\|^2 \\
 &\leq \sum_{i=1}^b (\gamma_i/N_i) \left\| \sum_{k=0}^{N_i-1} \prod_{l=k+1}^{N_i-1} (\mathbf{I}_{d_i} - \mathbf{C}_l^i) \right\|^2 \\
 &\leq \sum_{i=1}^b \gamma_i \sum_{k=0}^{N_i-1} \left\| \prod_{l=k+1}^{N_i-1} (\mathbf{I}_{d_i} - \mathbf{C}_l^i) \right\|^2 \\
 &\leq \sum_{i=1}^b \gamma_i \sum_{k=0}^{N_i-1} (1 - \gamma_i \tilde{m}_i)^{2(N_i-k-1)} \\
 &\leq \sum_{i=1}^b N_i \gamma_i .
 \end{aligned} \tag{S139}$$

Second, using the same techniques as for the above inequality, we obtain

$$\left\| \sum_{k=0}^{\infty} [\mathbf{M}_{\infty}]^{-1} \mathbf{M}_{k+1} \mathbf{J}(k) \mathbf{D}_{\gamma/(N\rho)}^{1/2} \mathbf{B}_0 \bar{\mathbf{B}}_0^{-1/2} \xi \right\|^2 \leq \sum_{i=1}^b \frac{N_i \gamma_i}{\rho_i} \left\| \mathbf{B}_0 \bar{\mathbf{B}}_0^{-1/2} \xi \right\|^2 \tag{S140}$$

Finally, the third term can be upper-bounded as

$$\mathbb{E} \left[ \left\| \sqrt{2} \sum_{k=0}^{\infty} [\mathbf{M}_{\infty}]^{-1} \mathbf{M}_{k+1} \mathbf{J}(k) \mathbf{D}_N^{-1/2} \eta_{k+1} \right\|^2 \right] \leq 2 \sum_{i=1}^b d_i . \tag{S141}$$

Combining (S138), (S139), (S140) and (S141), we get

$$\int_{\mathbb{R}^p} \|\tilde{\mathbf{z}} - \mathbf{z}^*\|_{\mathbf{D}_{N\gamma}^{-1}}^2 P_{\rho, \gamma, N}^{\mathbf{z}}(\mathbf{z}^*, d\tilde{\mathbf{z}}) \leq \sum_{i=1}^b \gamma_i N_i (1 + \text{Tr}(\mathbf{P}_0)/\rho_i) + 2 \sum_{i=1}^b d_i .$$

□

Given  $\varepsilon > 0$ , we are now ready to provide a condition on the number of iterations  $n_\varepsilon$  to achieve  $W_2(\mu_\rho^* P_{\rho, \gamma, N}^{n_\varepsilon}, \Pi_{\rho, \gamma}) \leq \varepsilon/3$  in the case where for any  $i \in [b]$ ,  $m_i = m$ ,  $M_i = M$ ,  $\rho_i = \rho$ ,  $\gamma_i = \gamma$  and  $N_i = N$ . Define

$$\begin{aligned} E_0^2 = 9(1 + \|\bar{\mathbf{B}}_0^{-1} \mathbf{B}_0^\top \tilde{\mathbf{D}}_0^{1/2}\|) 2N\gamma \left[ \frac{2}{N(1 - \kappa_\gamma^2)} \left( \frac{1 + \kappa_\gamma^2}{1 - \kappa_\gamma^2} \cdot \gamma M^2 \|\mathbf{u}^*\|^2 \right. \right. \\ \left. \left. + (\gamma/\rho) \text{Tr}(\mathbf{P}_0) + 2 \sum_{i=1}^b d_i \right) + 2b\gamma N (1 + \text{Tr}(\mathbf{P}_0)/\rho) + 4 \sum_{i=1}^b d_i \right]. \end{aligned}$$

**Theorem S40.** Assume **H1-H2** and assume that for any  $i \in [b]$ ,  $m_i = m$  and  $M_i = M$ . In addition, let  $\mathbf{N} = N\mathbf{1}_b$ ,  $\gamma = \gamma\mathbf{1}_b$ ,  $\rho = \rho\mathbf{1}_b$ ,  $\rho > 0$ ,  $\gamma > 0$ ,  $N \geq 1$ , such that  $\gamma < 1/M$ ,  $N\gamma < 2/(m + M)$ , and (S46) is satisfied. Then, for any  $\varepsilon > 0$ , any

$$n_\varepsilon \geq 2 \log(E_0/\varepsilon) / (N\gamma m),$$

we have,  $W_2(\mu_\rho^* P_{\rho, \gamma, N}^{n_\varepsilon}, \Pi_{\rho, \gamma}) \leq \varepsilon/3$ .

*Proof.* By some algebra and using  $1/\log(1/(1-x)) \leq 1/x$  for  $0 < x < 1$ , the proof directly follows from Proposition S14 combined with Proposition S38 and Lemma S39.  $\square$

## S5.2. Upper bound on the tolerance parameter $\rho_\varepsilon$

Define

$$\begin{aligned} R_0 &= 2\sigma_U^2 \left( d\sigma_U^2 + \sum_{i=1}^b M_i^2 \|\mathbf{A}_i(\boldsymbol{\theta}^* - \boldsymbol{\theta}_i^*)\|^2 \right) + 2\sigma_U^4, \\ R_1 &= d\sigma_U^2 + \sum_{i=1}^b M_i^2 \|\mathbf{A}_i(\boldsymbol{\theta}^* - \boldsymbol{\theta}_i^*)\|^2 + \sum_{i=1}^b d_i M_i/2 \\ R_2 &= 2d \max_{i \in [b]} \{M_i\} \sigma_U^2 + 2 \sum_{i=1}^b M_i^3 \|\mathbf{A}_i(\boldsymbol{\theta}^* - \boldsymbol{\theta}_i^*)\|^2 + 8\sigma_U^4 + 8\sigma_U^2 \left[ 2d\sigma_U^2 \right. \\ &\quad \left. + 2 \sum_{i=1}^b M_i^2 \|\mathbf{A}_i(\boldsymbol{\theta}^* - \boldsymbol{\theta}_i^*)\|^2 \right]. \end{aligned}$$

Recall that  $\bar{\rho} = \max_{i \in [b]} \{\rho_i\}$ . Then, the following result holds.

**Lemma S41.** Assume **H1-H2**. For any  $\varepsilon > 0$ , let  $\rho_\varepsilon \in (\mathbb{R}_+^*)^b$  such that

$$\begin{aligned} \bar{\rho}_\varepsilon &\leq \frac{-R_1 + \sqrt{R_1^2 + 4R_0\varepsilon m_U^{1/2}/(3\sqrt{2})}}{2R_0} \wedge \frac{\varepsilon\sqrt{m_U}}{3\sqrt{2}\sqrt{R_2 + [R_2/(12\sigma_U^2) + \sum_{i=1}^b d_i M_i]^2}} \\ &\wedge \frac{1}{12\sigma_U^2} \wedge \frac{-\sum_{i=1}^b d_i M_i + \sqrt{(\sum_{i=1}^b d_i M_i)^2 + 6R_2}}{2R_2}. \end{aligned}$$

Then,  $W_2(\pi_{\rho_\varepsilon}, \pi) \leq \varepsilon/3$ .

*Proof.* Let  $\varepsilon > 0$ . From (S73), for any  $\bar{\rho} \leq 1/(12\sigma_U^2)$ ,  $W_2(\pi_\rho, \pi) \leq \sqrt{\frac{2}{m_U}} \max(A_1, A_3^{1/2})$ , where  $A_1, A_3$  are defined in (S69) and (S72) respectively. This implies that  $W_2(\pi_\rho, \pi) \leq \varepsilon/3$  is verified if  $\max(A_1, A_3^{1/2}) \leq \varepsilon\sqrt{m_U}/(3\sqrt{2})$ . First,  $A_1 \leq \varepsilon\sqrt{m_U}/(3\sqrt{2})$  holds if

$$\bar{\rho} \leq \frac{-R_1 + \sqrt{R_1^2 + 4R_0\varepsilon m_U^{1/2}/(3\sqrt{2})}}{2R_0} \wedge \frac{1}{12\sigma_U^2}. \quad (\text{S142})$$

We now focus on  $A_3$ . Using the fact that for any  $x \in \mathbb{R}$ ,  $e^x \geq x + 1$ , we have  $2 \prod_{i=1}^b (1 + \rho_i M_i)^{d_i} \geq 2 + \sum_{i=1}^b d_i \log(1 + \rho_i M_i)$  and therefore

$$A_3 \leq \exp \left( \bar{\rho}^2 R_2 + \sum_{i=1}^b d_i \log(1 + \rho_i M_i) \right) - 1 - \sum_{i=1}^b d_i \log(1 + \rho_i M_i) .$$

Since  $\sum_{i=1}^b d_i \log(1 + \rho_i M_i) \leq \bar{\rho} \sum_{i=1}^b d_i M_i$ ,  $\bar{\rho}^2 R_2 + \sum_{i=1}^b d_i \log(1 + \rho_i M_i) \leq 3/2$  holds for

$$\bar{\rho} \leq \frac{-\sum_{i=1}^b d_i M_i + \sqrt{(\sum_{i=1}^b d_i M_i)^2 + 6R_2}}{2R_2} . \quad (\text{S143})$$

Since for any  $x \leq 3/2$ ,  $e^x \leq 1 + x + x^2$  and using the fact that  $\bar{\rho} \leq 1/(12\sigma_U^2)$ , it follows that

$$A_3 \leq \bar{\rho}^2 R_2 + \left( \bar{\rho}^2 R_2 + \bar{\rho} \sum_{i=1}^b d_i M_i \right)^2 \leq \bar{\rho}^2 \left[ B_1 + \left( \frac{R_2}{12\sigma_U^2} + \sum_{i=1}^b d_i M_i \right)^2 \right] .$$

Hence  $A_3^{1/2} \leq \varepsilon \sqrt{m_U} / (3\sqrt{2})$  holds under (S143) and

$$\bar{\rho} \leq \frac{\varepsilon \sqrt{m_U}}{3\sqrt{2} \sqrt{R_2 + \left( \frac{R_2}{12\sigma_U^2} + \sum_{i=1}^b d_i M_i \right)^2}} . \quad (\text{S144})$$

The proof is concluded by combining (S142), (S143) and (S144).  $\square$

### S5.3. Upper bound on the step-size $\gamma_\varepsilon$ and number of local iteration $N_\varepsilon$

Based on Proposition S29 or Proposition S33, we now determine an upper bound on  $\gamma_\varepsilon$  to ensure  $W_2(\Pi_\rho, \Pi_{\rho, \gamma_\varepsilon}) \leq \varepsilon/3$  in the case  $\mathbf{N} = N\mathbf{1}_b$ ,  $\gamma = \gamma\mathbf{1}_b$ ,  $\rho = \rho\mathbf{1}_b$  where  $\rho > 0$ ,  $\gamma > 0$ ,  $N \geq 1$ . The following results hold depending if **H3** is considered. Define

$$C_\rho = \frac{4\tilde{M}^2(1 + \|\tilde{\mathbf{B}}_0^{-1}\mathbf{B}_0^\top \tilde{\mathbf{D}}_0^{1/2}\|^2)}{5m} , \quad (\text{S145})$$

$$C_0 = (\tilde{M}^2/2) \left[ \tilde{M}/\tilde{m} + 1/6 \right] \sum_{i=1}^b d_i , \quad C_1 = \sum_{i=1}^b d_i , \quad C_2 = \varepsilon^2/(9C_\rho) .$$

**Lemma S42.** Assume **H1-H2** and assume for any  $i \in [b]$ ,  $m_i = m$  and  $M_i = M$ . In addition, let  $\rho, \gamma_\varepsilon > 0$  and  $N_\varepsilon \geq 1$  such that  $\rho = \rho\mathbf{1}_b$ ,  $\gamma_\varepsilon = \gamma_\varepsilon\mathbf{1}_b$ ,  $\mathbf{N}_\varepsilon = N_\varepsilon\mathbf{1}_b$  and  $\varepsilon > 0$  satisfying

$$\gamma_\varepsilon \leq \frac{-C_1 + \sqrt{C_1^2 + 4C_0C_2}}{2C_0} \wedge \frac{m}{40\tilde{M}^2} . \quad (\text{S146})$$

Then  $W_2(\Pi_\rho, \Pi_{\rho, \gamma_\varepsilon}) \leq \varepsilon/3$ .

*Proof.* Let  $\varepsilon > 0$ . By Proposition S29, note that  $W_2^2(\Pi_\rho, \Pi_{\rho, \gamma_\varepsilon}) \leq \varepsilon^2/9$  is satisfied if

$$C_0\gamma_\varepsilon^2 + C_1\gamma_\varepsilon \leq C_2 .$$

This inequality is satisfied under the choice (S147).  $\square$

We now provide a condition on  $N$  and  $\gamma$  when **H3** is considered.



**Lemma S43.** Assume **H1-H2** and assume for any  $i \in [b]$ ,  $m_i = m$ ,  $M_i = M$  and  $L_i = L$ . In addition, let  $\rho, \gamma_\varepsilon > 0$  and  $N_\varepsilon \geq 1$  such that  $\rho = \rho \mathbf{1}_b$ ,  $\gamma_\varepsilon = \gamma_\varepsilon \mathbf{1}_b$ ,  $N_\varepsilon = N_\varepsilon \mathbf{1}_b$  and  $\varepsilon > 0$  satisfying

$$\gamma_\varepsilon \leq \frac{\varepsilon}{6b\sqrt{5 \max_{i \in [b]} \{d_i\} C_\rho \tilde{M}^2 [4 + (\max_{i \in [b]} \{d_i\} L^2 m) / (20 \tilde{M}^4)]}} \wedge \frac{m}{40 \tilde{M}^2} \quad (\text{S147})$$

$$\wedge \frac{\varepsilon}{6b(5C_\rho \max_{i \in [b]} \{d_i\} m^3 / \tilde{M}^2)}, \quad (\text{S148})$$

where  $C_\rho$  is defined in (S145). Then  $W_2(\Pi_\rho, \Pi_{\rho, \gamma_\varepsilon}) \leq \varepsilon/3$ .

*Proof.* In Proposition S33, we dissociate  $R^*(\gamma)$  into two contributions and the conditions we impose on  $\gamma_\varepsilon$  ensure  $W_2(\Pi_\rho, \Pi_{\rho, \gamma_\varepsilon}) \leq \varepsilon/3$ . More precisely, we have  $\sum_{i=1}^b d_i \gamma_i^2 \tilde{M}_i^2 + \frac{d_i \gamma_i^2 \mathfrak{f}_i}{M_i} (d_i L_i^2 + \frac{\tilde{M}_i^4}{m_i}) \leq 2\varepsilon^2/9$  and  $\sum_{i=1}^b d_i \gamma_i \tilde{M}_i \mathfrak{f}_i^3 (1 + \mathfrak{f}_i + \mathfrak{f}_i^2) \leq 2\varepsilon^2/9$  where  $\mathfrak{f}_i < 1$  for any  $i \in [b]$ .  $\square$

#### S5.4. Discussion

Let  $\rho_\varepsilon = \rho_\varepsilon \mathbf{1}_b$  such that  $W_2(\pi_{\rho_\varepsilon}, \pi) \leq \varepsilon/3$ . From Lemma S41,  $\rho_\varepsilon = \mathcal{O}(\varepsilon/d)$  when  $\varepsilon \rightarrow 0$  and  $d \rightarrow \infty$ . Similarly, let  $\gamma_\varepsilon = \gamma_\varepsilon \mathbf{1}_b$  such that  $W_2(\Pi_{\rho_\varepsilon}, \Pi_{\rho_\varepsilon, \gamma_\varepsilon}) < \varepsilon/3$ . Under **H1-H2**, we obtain by Lemma S42  $\gamma_\varepsilon = \mathcal{O}(\varepsilon^4/d^3)$ . On the other hand, when **H3** is additionally assumed, we get by Lemma S43  $\gamma_\varepsilon = \mathcal{O}(\varepsilon^2/d^2)$ . Finally, to apply Theorem S40 for the previous choices  $\gamma_\varepsilon$  and  $\rho_\varepsilon$ , we obtain for  $N_\varepsilon = N_\varepsilon \mathbf{1}_b$  the conditions  $N_\varepsilon = \mathcal{O}(d/\varepsilon^2)$  and  $N_\varepsilon = \mathcal{O}(1)$  under **H1-H2** and **H1-H2-H3**, respectively. In both scenarios, Theorem S40 implies  $n_\varepsilon = \mathcal{O}(d^2 \log(d)/(\varepsilon^2 |\log(\varepsilon)|))$ . This concludes the results depicted in Table 1 in the main paper.

#### References

- Bakry, D., Gentil, I., and Ledoux, M. *Analysis and geometry of Markov diffusion operators*, volume 348. Springer Science & Business Media, 2013.
- Douc, R., Moulines, E., Priouret, P., and Soulier, P. *Markov chains*. Springer, 2018.
- Durmus, A. and Moulines, E. High-dimensional Bayesian inference via the unadjusted Langevin algorithm. *Bernoulli*, 25 (4A):2854–2882, 2019. doi: 10.3150/18-BEJ1073.
- Kent, J. Time-reversible diffusions. *Advances in Applied Probability*, 10:819–835, 12 1978. ISSN 1475-6064. doi: 10.1017/S0001867800031396.
- Ledoux, M. *The Concentration of Measure Phenomenon*, volume 89 of *Mathematical Surveys and Monographs*. American Mathematical Society, Providence, RI, 2001.
- Otto, F. and Villani, C. Generalization of an Inequality by Talagrand and Links with the Logarithmic Sobolev Inequality. *Journal of Functional Analysis*, 173(2):361 – 400, 2000. ISSN 0022-1236.
- Revuz, D. and Yor, M. *Continuous martingales and Brownian motion*, volume 293. Springer Science & Business Media, 2013.
- Roberts, G. O. and Tweedie, R. L. Exponential convergence of Langevin distributions and their discrete approximations. *Bernoulli*, 2(4):341–363, 12 1996.
- Villani, C. *Optimal Transport: Old and New*. Springer Berlin Heidelberg, 2008.
- Vono, M., Paulin, D., and Doucet, A. Efficient MCMC sampling with dimension-free convergence rate using ADMM-type splitting. *arXiv preprint arXiv:1905.11937*, 2019.
