# Supplementary material
Source: ML conference proceedings conference paper supplement (https://proceedings.mlr.press/v139/plassier21a.html)

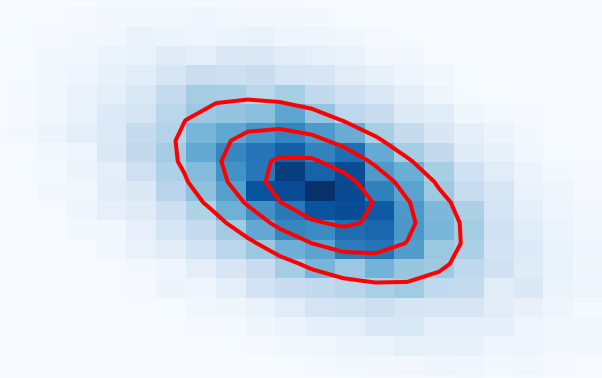

Supplement: Supplementary file 1 [file plassier21a-supp.zip]

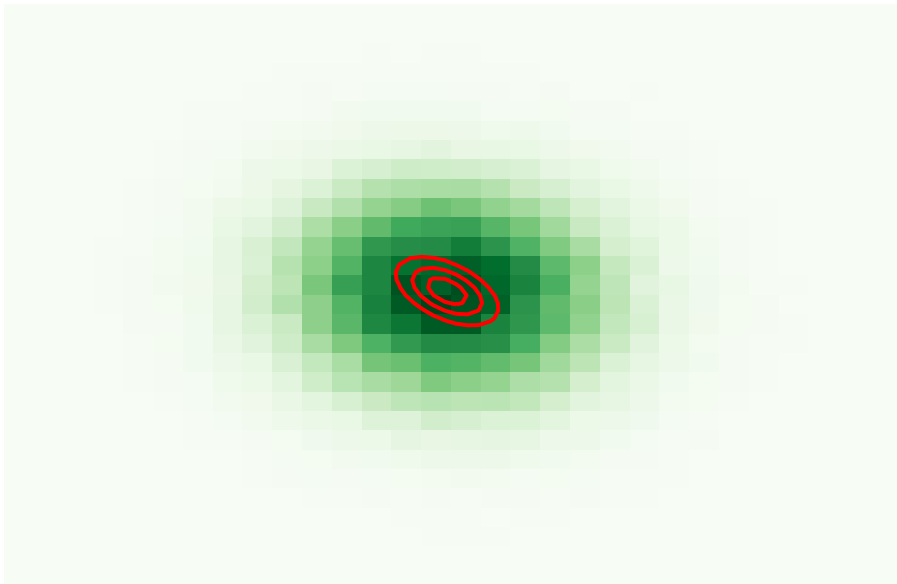

Supplement: Supplementary file 2 [file plassier21a-supp.zip]

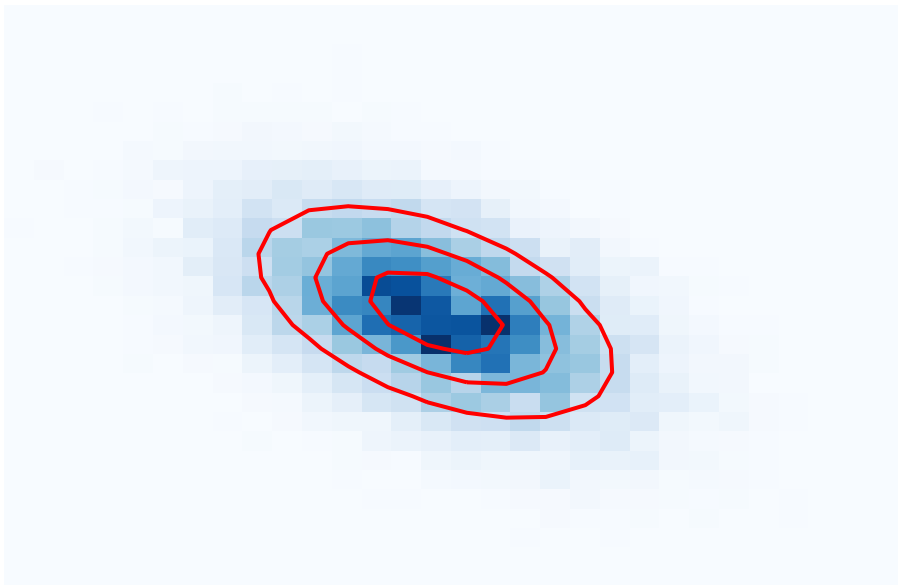

Supplement: Supplementary file 3 [file plassier21a-supp.zip]

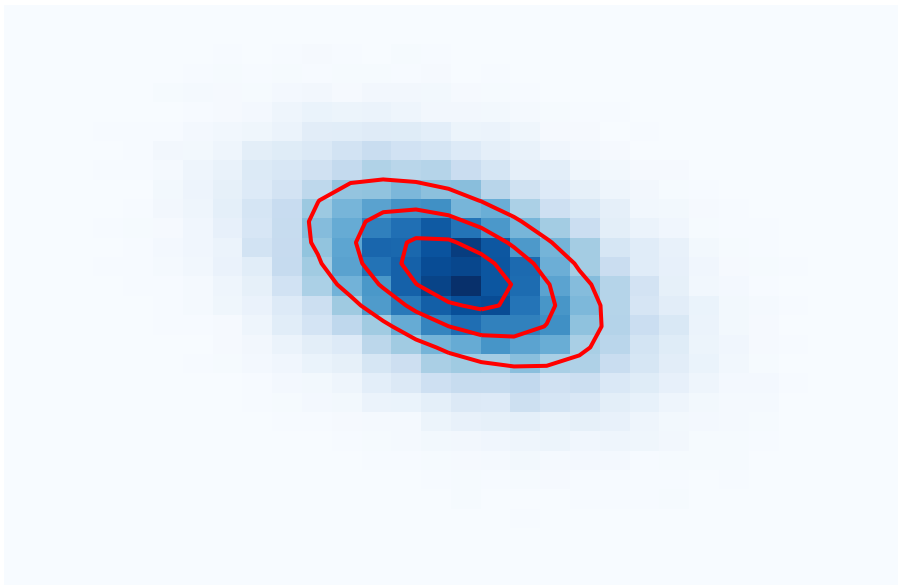

Supplement: Supplementary file 4 [file plassier21a-supp.zip]

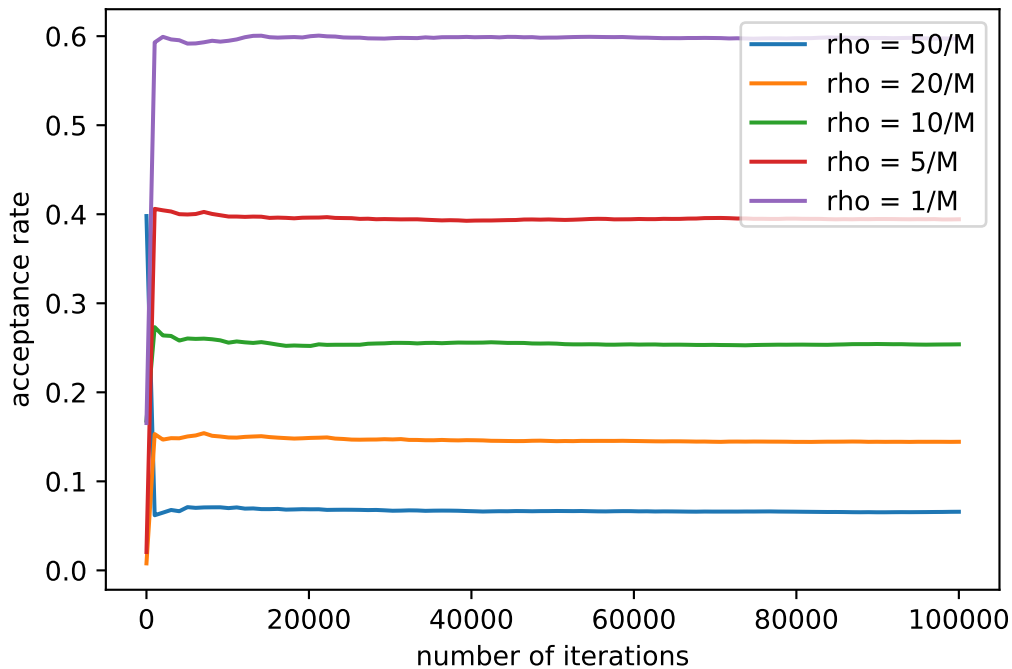

Supplement: Supplementary file 5 [file plassier21a-supp.zip]

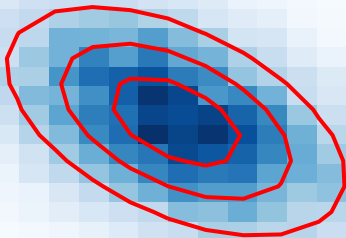

Supplement: Supplementary file 6 [file plassier21a-supp.zip]

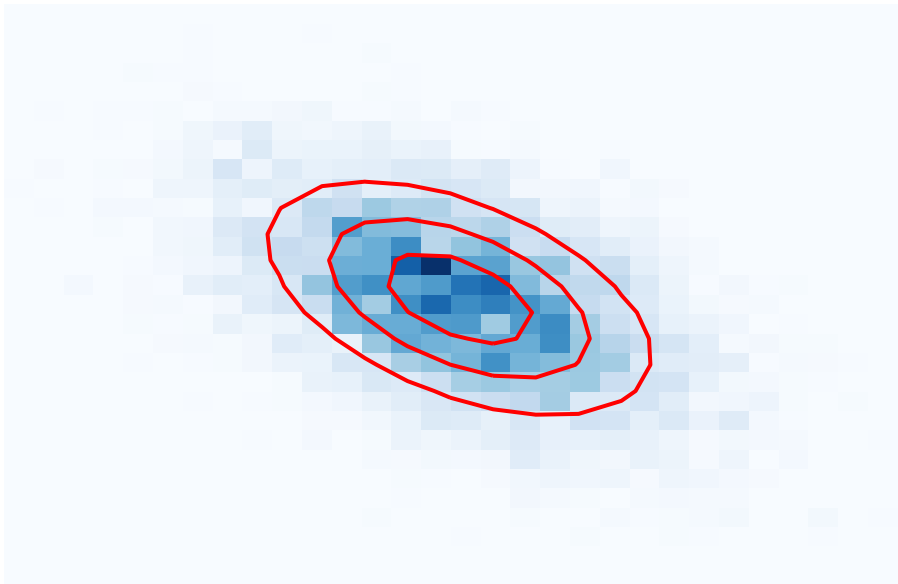

Supplement: Supplementary file 7 [file plassier21a-supp.zip]

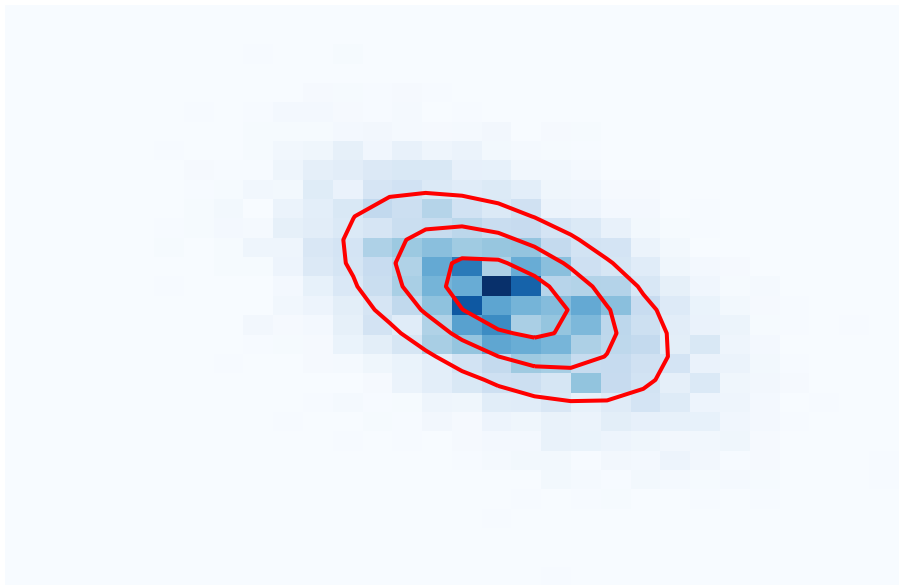

Supplement: Supplementary file 8 [file plassier21a-supp.zip]

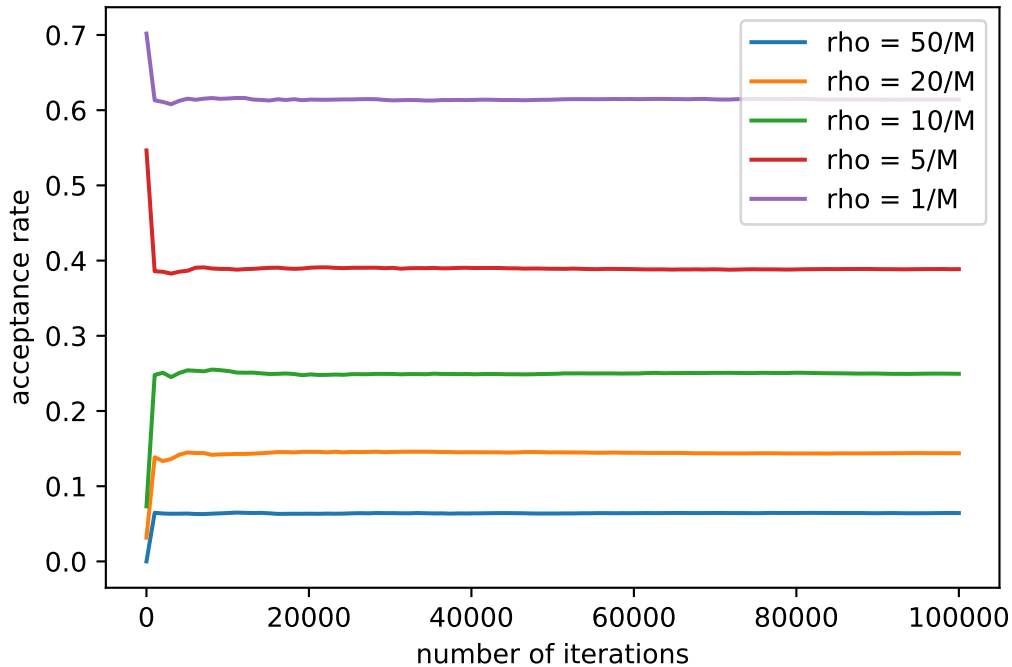

Supplement: Supplementary file 10 [file plassier21a-supp.zip]

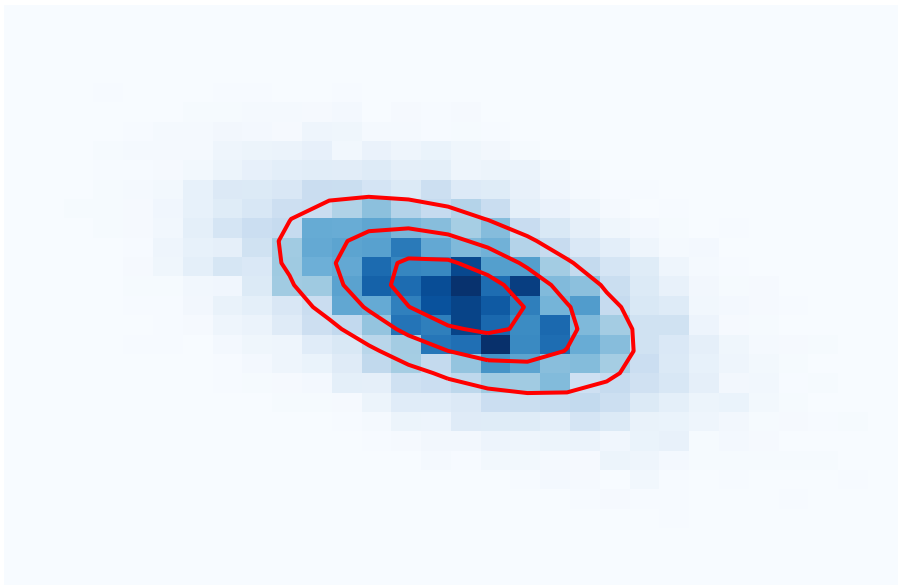

Supplement: Supplementary file 11 [file plassier21a-supp.zip]

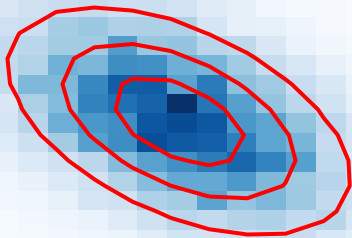

Supplement: Supplementary file 12 [file plassier21a-supp.zip]

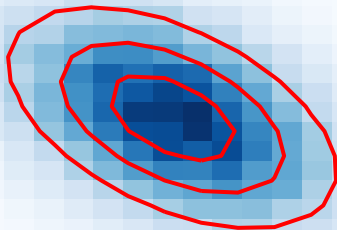

Supplement: Supplementary file 13 [file plassier21a-supp.zip]

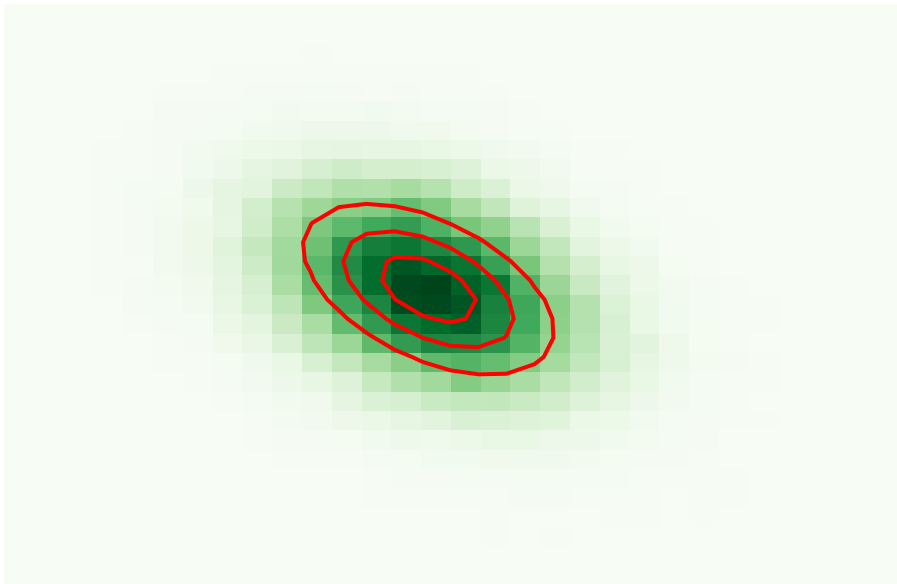

Supplement: Supplementary file 14 [file plassier21a-supp.zip]

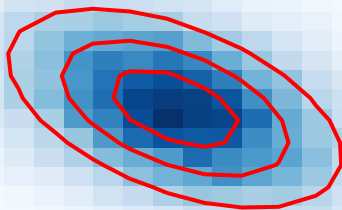

Supplement: Supplementary file 15 [file plassier21a-supp.zip]

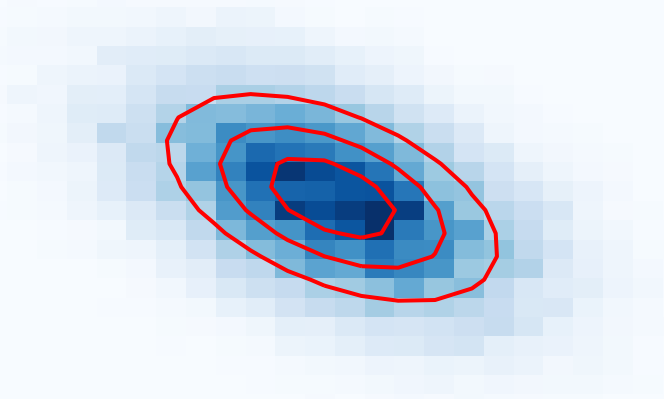

Supplement: Supplementary file 16 [file plassier21a-supp.zip]

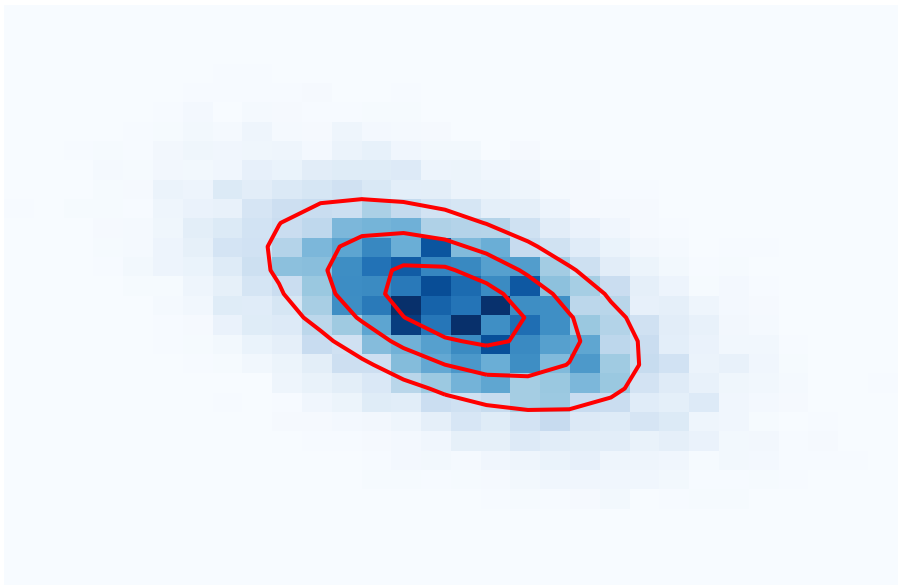

Supplement: Supplementary file 17 [file plassier21a-supp.zip]

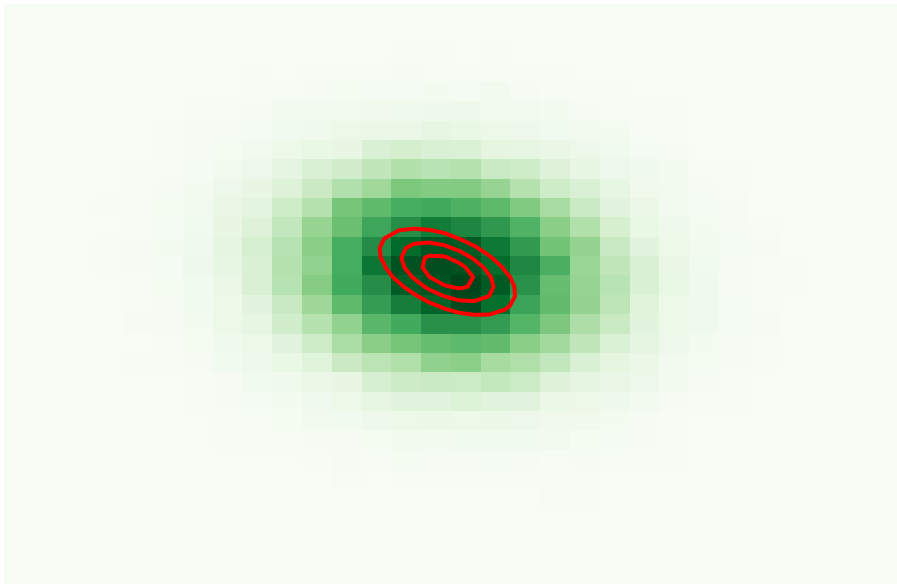

Supplement: Supplementary file 18 [file plassier21a-supp.zip]

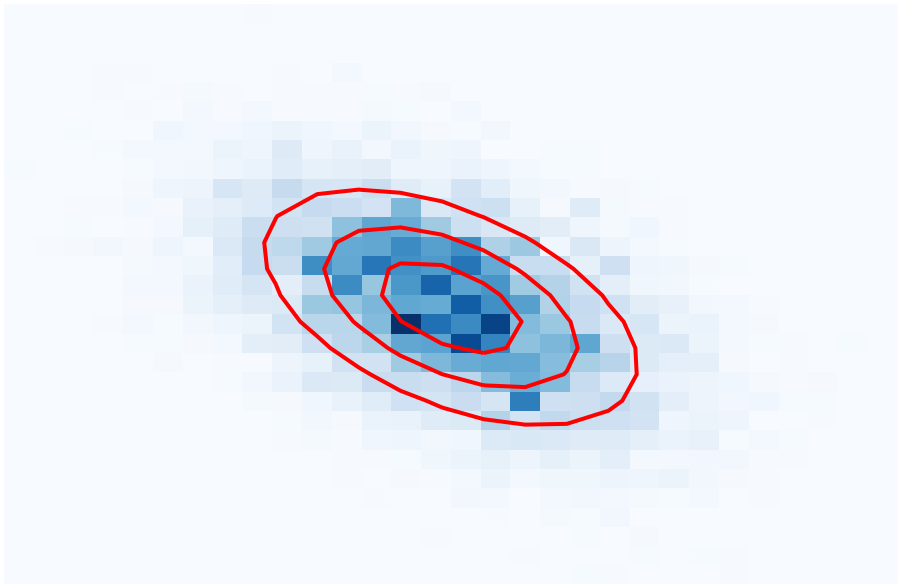

Supplement: Supplementary file 19 [file plassier21a-supp.zip]

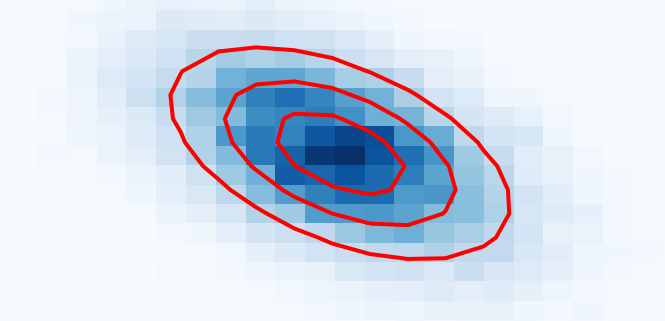

Supplement: Supplementary file 20 [file plassier21a-supp.zip]

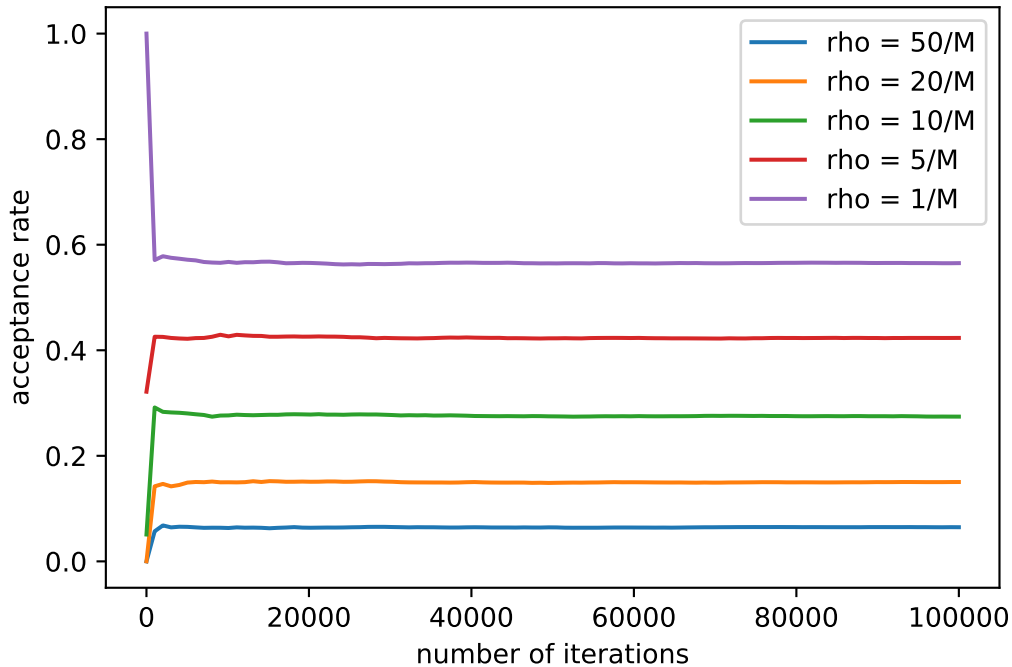

Supplement: Supplementary file 21 [file plassier21a-supp.zip]

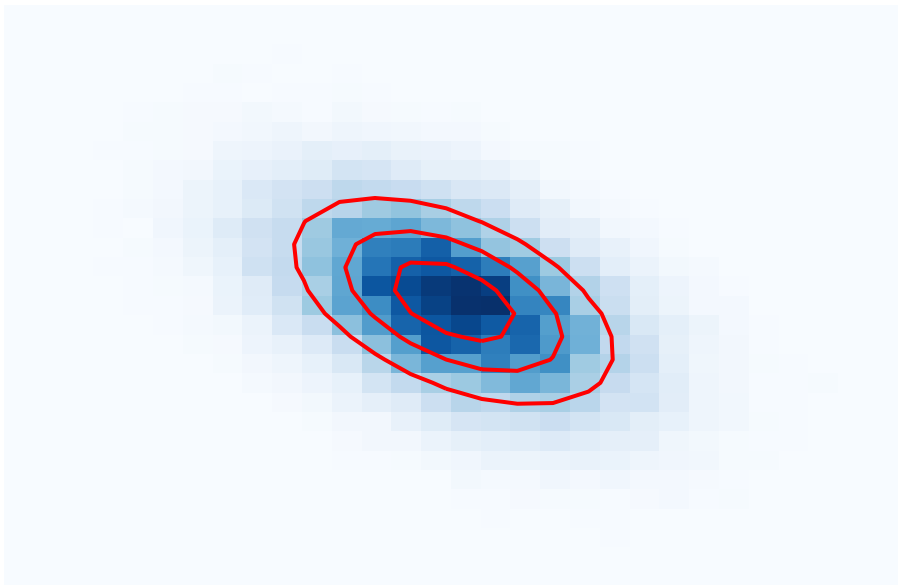

Supplement: Supplementary file 22 [file plassier21a-supp.zip]

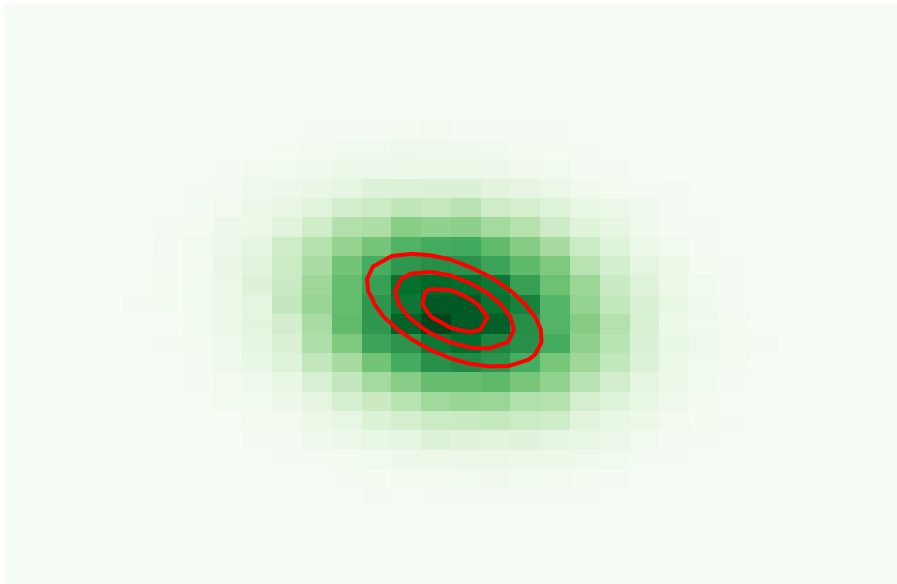

Supplement: Supplementary file 23 [file plassier21a-supp.zip]

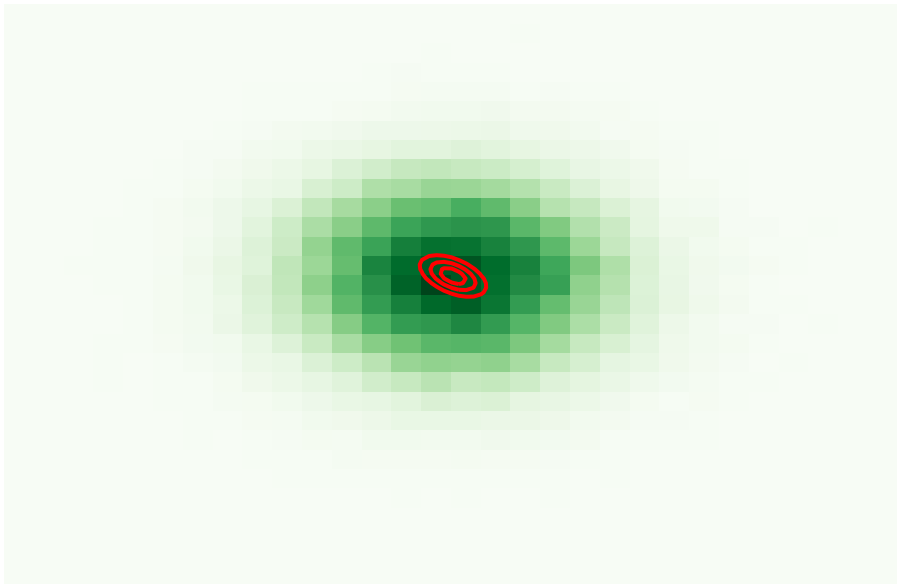

Supplement: Supplementary file 24 [file plassier21a-supp.zip]
